# Supplementary material for: Cannabinoids Reduce Extracellular Vesicle Release from HIV-1 Infected Myeloid Cells and Inhibit Viral Transcription
Source: Cells. 2022 Feb 18;11(4):723. doi: 10.3390/cells11040723 (PMC8869966; doi:10.3390/cells11040723)
Supplement: Supplementary file 1 [file cells-11-00723-s001.zip › CBD Pull Down Mass Spec Data.xlsx]

## Sheet: U1_PMA_CBD_TNE300
Accession	Description	Coverage	# Peptides	# PSMs	# Unique Peptides	# AAs	MW [kDa]	calc. pI	Score A Sequest HT	# Peptides A Sequest HT		Protein Accession
4501881	actin, alpha skeletal muscle [Homo sapiens]	33.1565	14	24	1	377	42	5.39	75.75	14		NP_001091.1
4501883	actin, aortic smooth muscle [Homo sapiens]	30.2387	13	23	1	377	42	5.39	71.24	13		NP_001604.1
4501885	actin, cytoplasmic 1 [Homo sapiens]	47.7333	17	27	4	375	41.7	5.48	89.28	17		NP_001092.1
4501889	actin, gamma-enteric smooth muscle isoform 1 precursor [Homo sapiens]	30.3191	13	23	1	376	41.9	5.48	71.24	13		NP_001606.1
4502027	serum albumin preproprotein [Homo sapiens]	6.73235	4	4	4	609	69.3	6.28	10.84	4		NP_000468.1
4502285	sarcoplasmic/endoplasmic reticulum calcium ATPase 2 isoform a [Homo sapiens]	2.80843	2	2	2	997	109.6	5.36	6.9	2		NP_001672.1
4502303	ATP synthase subunit O, mitochondrial precursor [Homo sapiens]	30.0469	5	5	5	213	23.3	9.96	13.88	5		NP_001688.1
4502981	cytochrome c oxidase subunit 4 isoform 1, mitochondrial precursor [Homo sapiens]	21.8935	3	3	3	169	19.6	9.51	8.47	3		NP_001852.1
4503023	carnitine O-palmitoyltransferase 2, mitochondrial precursor [Homo sapiens]	3.79939	2	2	2	658	73.7	8.18	6.2	2		NP_000089.1
4503117	cystatin-B [Homo sapiens]	24.4898	2	2	2	98	11.1	7.56	7.44	2		NP_000091.1
4503143	cathepsin D preproprotein [Homo sapiens]	4.61165	2	2	2	412	44.5	6.54	5.97	2		NP_001900.1
4503475	elongation factor 1-alpha 2 [Homo sapiens]	10.3672	4	6	4	463	50.4	9.03	22.02	4		NP_001949.1
4503481	elongation factor 1-gamma [Homo sapiens]	12.357	4	4	4	437	50.1	6.67	16.02	4		NP_001395.1
4503571	alpha-enolase isoform 1 [Homo sapiens]	8.75576	3	3	3	434	47.1	7.39	11.21	3		NP_001419.1
4503607	electron transfer flavoprotein subunit alpha, mitochondrial isoform a [Homo sapiens]	13.8138	2	2	2	333	35.1	8.38	9.25	2		NP_000117.1
4504151	granulins precursor [Homo sapiens]	8.76897	4	4	4	593	63.5	6.83	15.8	4		NP_002078.1
4504165	gelsolin isoform a precursor [Homo sapiens]	13.4271	6	6	6	782	85.6	6.28	26.98	6		NP_000168.1
4504237	semaphorin-7A isoform 1 preproprotein [Homo sapiens]	3.9039	2	2	2	666	74.8	7.64	7.59	2		NP_003603.1
4504259	histone H2B type 1-L [Homo sapiens]	20.6349	2	2	2	126	13.9	10.32	7.78	2		NP_003510.1
4504261	histone H2B type 1-N [Homo sapiens]	20.6349	2	2	2	126	13.9	10.32	7.78	2		NP_003511.1
4504263	histone H2B type 1-M [Homo sapiens]	20.6349	2	2	2	126	14	10.32	7.78	2		NP_003512.1
4504269	histone H2B type 1-H [Homo sapiens]	20.6349	2	2	2	126	13.9	10.32	7.78	2		NP_003515.1
4504277	histone H2B type 2-E [Homo sapiens]	20.6349	2	2	2	126	13.9	10.32	7.78	2		NP_003519.1
4504323	histone H4 [Homo sapiens]	29.1262	3	4	3	103	11.4	11.36	10.11	3		NP_003539.1
4504347	hemoglobin subunit alpha [Homo sapiens]	16.9014	2	2	2	142	15.2	8.68	8.19	2		NP_000549.1
4504447	heterogeneous nuclear ribonucleoproteins A2/B1 isoform A2 [Homo sapiens]	12.0235	3	3	3	341	36	8.65	7.61	3		NP_002128.1
4504517	heat shock protein beta-1 [Homo sapiens]	9.7561	2	2	2	205	22.8	6.4	5.24	2		NP_001531.1
4504981	galectin-1 [Homo sapiens]	82.2222	10	14	10	135	14.7	5.5	47.76	10		NP_002296.1
4505257	moesin [Homo sapiens]	6.41248	3	3	3	577	67.8	6.4	10.29	3		NP_002435.1
4505571	sequestosome-1 isoform 1 [Homo sapiens]	8.63636	2	2	2	440	47.7	5.22	8.79	2		NP_003891.1
4505763	phosphoglycerate kinase 1 [Homo sapiens]	16.0671	4	4	4	417	44.6	8.1	14.07	4		NP_000282.1
4505775	phosphate carrier protein, mitochondrial isoform b precursor [Homo sapiens]	7.20222	2	2	2	361	39.9	9.36	8.38	2		NP_002626.1
4505881	plasminogen isoform 1 precursor [Homo sapiens]	4.44444	4	6	4	810	90.5	7.24	24.35	4		NP_000292.1
4506381	ras-related C3 botulinum toxin substrate 2 [Homo sapiens]	27.6042	5	5	5	192	21.4	7.61	10.6	5		NP_002863.1
4506467	radixin isoform 2 [Homo sapiens]	3.60206	2	2	2	583	68.5	6.37	6.18	2		NP_002897.1
4506605	60S ribosomal protein L23 [Homo sapiens]	19.2857	2	2	2	140	14.9	10.51	6.83	2		NP_000969.1
4506607	60S ribosomal protein L18 isoform 1 [Homo sapiens]	18.0851	3	3	3	188	21.6	11.72	11.34	3		NP_000970.1
4506661	60S ribosomal protein L7a [Homo sapiens]	10.1504	3	3	3	266	30	10.61	9.93	3		NP_000963.1
4506663	60S ribosomal protein L8 [Homo sapiens]	8.94942	2	2	2	257	28	11.03	6.52	2		NP_000964.1
4506671	60S acidic ribosomal protein P2 [Homo sapiens]	46.087	3	5	3	115	11.7	4.54	24.2	3		NP_000995.1
4506675	dolichyl-diphosphooligosaccharide--protein glycosyltransferase subunit 1 precursor [Homo sapiens]	6.42504	3	3	3	607	68.5	6.38	5.83	3		NP_002941.1
4506681	40S ribosomal protein S11 [Homo sapiens]	23.4177	3	3	3	158	18.4	10.3	10.62	3		NP_001006.1
4506691	40S ribosomal protein S16 [Homo sapiens]	25.3425	3	3	3	146	16.4	10.21	8.76	3		NP_001011.1
4506693	40S ribosomal protein S17 [Homo sapiens]	16.2963	2	3	2	135	15.5	9.85	9.97	2		NP_001012.1
4506723	40S ribosomal protein S3a isoform 1 [Homo sapiens]	17.4242	4	4	4	264	29.9	9.73	5.13	4		NP_000997.1
4506725	40S ribosomal protein S4, X isoform X isoform [Homo sapiens]	11.4068	3	3	3	263	29.6	10.15	10.59	3		NP_000998.1
4506765	protein S100-A4 [Homo sapiens]	19.802	2	3	2	101	11.7	6.11	5.26	2		NP_002952.1
4507677	endoplasmin precursor [Homo sapiens]	11.208	6	6	6	803	92.4	4.84	21.35	6		NP_003290.1
4507729	tubulin beta-2A chain [Homo sapiens]	14.6067	7	8	5	445	49.9	4.89	34.09	7		NP_001060.1
4507949	14-3-3 protein beta/alpha [Homo sapiens]	9.7561	2	2	1	246	28.1	4.83	6.71	2		NP_003395.1
4557305	fructose-bisphosphate aldolase A isoform 1 [Homo sapiens]	9.61538	3	3	3	364	39.4	8.09	9.9	3		NP_000025.1
4557361	BH3-interacting domain death agonist isoform 2 [Homo sapiens]	11.2821	2	2	2	195	22	5.44	6	2		NP_001187.1
4757826	beta-2-microglobulin precursor [Homo sapiens]	15.1261	2	2	2	119	13.7	6.52	2.95	2		NP_004039.1
4758670	leupaxin isoform 2 [Homo sapiens]	9.84456	2	2	2	386	43.3	6.01	7.86	2		NP_004802.1
4758984	ras-related protein Rab-11A isoform 1 [Homo sapiens]	9.72222	2	2	2	216	24.4	6.57	5.48	2		NP_004654.1
4826898	profilin-1 [Homo sapiens]	60.7143	7	7	7	140	15	8.27	27.46	7		NP_005013.1
4885049	actin, alpha cardiac muscle 1 proprotein [Homo sapiens]	33.1565	14	24	1	377	42	5.39	75.75	14		NP_005150.1
5031741	dnaJ homolog subfamily A member 2 [Homo sapiens]	6.79612	2	2	2	412	45.7	6.48	8.64	2		NP_005871.1
5031839	keratin, type II cytoskeletal 6A [Homo sapiens]	6.73759	3	3	1	564	60	8	8.28	3		NP_005545.1
5031857	L-lactate dehydrogenase A chain isoform 1 [Homo sapiens]	34.3373	9	11	8	332	36.7	8.27	43.38	9		NP_005557.1
5031973	protein disulfide-isomerase A6 isoform d precursor [Homo sapiens]	6.59091	2	2	2	440	48.1	5.08	8.9	2		NP_005733.1
5174735	tubulin beta-4B chain [Homo sapiens]	32.5843	12	13	10	445	49.8	4.89	55.65	12		NP_006079.1
5453990	proteasome activator complex subunit 1 isoform 1 [Homo sapiens]	13.253	3	3	3	249	28.7	6.02	10.67	3		NP_006254.1
5729770	tripeptidyl-peptidase 1 preproprotein [Homo sapiens]	6.2167	3	3	3	563	61.2	6.48	6.91	3		NP_000382.3
5803227	14-3-3 protein theta [Homo sapiens]	9.79592	2	2	1	245	27.7	4.78	6.38	2		NP_006817.1
6031192	phosphate carrier protein, mitochondrial isoform a precursor [Homo sapiens]	7.18232	2	2	2	362	40.1	9.38	8.38	2		NP_005879.1
6806890	galectin-9 isoform long [Homo sapiens]	8.4507	2	2	2	355	39.5	9.17	7.78	2		NP_033665.1
6912238	peroxiredoxin-5, mitochondrial isoform a precursor [Homo sapiens]	15.8879	2	2	2	214	22	8.57	8.93	2		NP_036226.1
7305503	stomatin-like protein 2, mitochondrial isoform a [Homo sapiens]	24.1573	4	4	4	356	38.5	7.39	17.25	4		NP_038470.1
7669492	glyceraldehyde-3-phosphate dehydrogenase isoform 1 [Homo sapiens]	17.9104	4	4	4	335	36	8.46	15.59	4		NP_002037.2
8923390	MICOS complex subunit MIC19 [Homo sapiens]	45.815	10	12	10	227	26.1	8.28	38.96	10		NP_060282.1
9507215	tubulin alpha-8 chain isoform 1 [Homo sapiens]	14.2539	5	5	5	449	50.1	5.06	12.88	5		NP_061816.1
9845509	ras-related C3 botulinum toxin substrate 1 isoform Rac1b [Homo sapiens]	10.4265	2	2	2	211	23.5	8.63	4.7	2		NP_061485.1
9845511	ras-related C3 botulinum toxin substrate 1 isoform Rac1 [Homo sapiens]	11.4583	2	2	2	192	21.4	8.5	4.7	2		NP_008839.2
9910382	mitochondrial import receptor subunit TOM22 homolog [Homo sapiens]	26.0563	2	3	2	142	15.5	4.34	14.21	2		NP_064628.1
10800140	histone H2B type 1-B [Homo sapiens]	20.6349	2	2	2	126	13.9	10.32	7.78	2		NP_066406.1
10835049	transforming protein RhoA precursor [Homo sapiens]	20.7254	4	4	4	193	21.8	6.1	13.08	4		NP_001655.1
10835147	interleukin-1 receptor antagonist protein isoform 3 [Homo sapiens]	13.8365	2	2	2	159	17.9	5.35	6.47	2		NP_000568.1
10863927	peptidyl-prolyl cis-trans isomerase A isoform 1 [Homo sapiens]	47.2727	5	6	5	165	18	7.81	19.36	5		NP_066953.1
10864011	sulfide:quinone oxidoreductase, mitochondrial [Homo sapiens]	31.7778	10	13	10	450	49.9	9.11	53.46	10		NP_067022.1
11386147	prosaposin isoform a preproprotein [Homo sapiens]	6.87023	2	2	2	524	58.1	5.17	9.67	2		NP_002769.1
11415026	60S ribosomal protein L18a [Homo sapiens]	13.6364	3	4	3	176	20.7	10.71	9.19	3		NP_000971.1
11968182	40S ribosomal protein S18 [Homo sapiens]	24.3421	4	5	4	152	17.7	10.99	14.59	4		NP_072045.1
13124875	myosin-11 isoform SM2A [Homo sapiens]	1.23839	2	3	2	1938	223.4	5.53	13.64	2		NP_074035.1
13124879	myosin-11 isoform SM1A [Homo sapiens]	1.21704	2	3	2	1972	227.2	5.5	13.64	2		NP_002465.1
13376181	tubulin alpha chain-like 3 isoform 1 [Homo sapiens]	2.46637	2	2	2	446	49.9	6.05	4.56	2		NP_079079.1
13562114	tubulin beta-1 chain [Homo sapiens]	4.65632	3	4	3	451	50.3	5.17	14.75	3		NP_110400.1
13676857	heat shock-related 70 kDa protein 2 [Homo sapiens]	5.00782	3	3	2	639	70	5.74	8.67	3		NP_068814.2
13904866	60S ribosomal protein L28 isoform 2 [Homo sapiens]	22.6277	2	2	2	137	15.7	12.02	7.5	2		NP_000982.2
14141152	heterogeneous nuclear ribonucleoprotein M isoform a [Homo sapiens]	4.65753	3	3	3	730	77.5	8.7	8.72	3		NP_005959.2
14389309	tubulin alpha-1C chain isoform c [Homo sapiens]	23.3853	8	8	8	449	49.9	5.1	24.61	8		NP_116093.1
15055539	40S ribosomal protein S2 [Homo sapiens]	7.50853	2	2	2	293	31.3	10.24	5.77	2		NP_002943.2
15431290	60S ribosomal protein L11 isoform 1 [Homo sapiens]	12.3596	2	2	2	178	20.2	9.6	6.85	2		NP_000966.2
15431310	keratin, type I cytoskeletal 14 [Homo sapiens]	3.81356	2	2	2	472	51.6	5.16	6.23	2		NP_000517.2
16306566	histone H2B type 1-O [Homo sapiens]	20.6349	2	2	2	126	13.9	10.32	7.78	2		NP_003518.2
16507237	78 kDa glucose-regulated protein precursor [Homo sapiens]	31.9572	19	23	18	654	72.3	5.16	94.6	19		NP_005338.1
16579885	60S ribosomal protein L4 [Homo sapiens]	11.007	5	6	5	427	47.7	11.06	16.76	5		NP_000959.2
17017988	cytochrome c oxidase subunit 5B, mitochondrial precursor [Homo sapiens]	24.031	3	5	3	129	13.7	8.81	17.53	3		NP_001853.2
17921989	tubulin alpha-4A chain isoform 1 [Homo sapiens]	23.2143	7	7	7	448	49.9	5.06	20.77	7		NP_005991.1
17921993	tubulin alpha-3C/D chain [Homo sapiens]	25.3333	8	8	8	450	49.9	5.1	24.49	8		NP_005992.1
17986001	major histocompatibility complex, class I, B precursor [Homo sapiens]	8.01105	2	2	2	362	40.4	5.85	7.01	2		NP_005505.2
17986258	myosin light polypeptide 6 isoform 1 [Homo sapiens]	28.4768	3	4	3	151	16.9	4.65	15.92	3		NP_066299.2
18105048	histone H2B type 1-K [Homo sapiens]	20.6349	2	2	2	126	13.9	10.32	7.78	2		NP_542160.1
20070125	protein disulfide-isomerase precursor [Homo sapiens]	17.3228	6	6	6	508	57.1	4.87	16.83	6		NP_000909.2
20070197	dolichyl-diphosphooligosaccharide--protein glycosyltransferase 48 kDa subunit precursor [Homo sapiens]	3.94737	2	2	2	456	50.7	6.4	6.15	2		NP_005207.2
20336752	histone H2B type 1-D [Homo sapiens]	20.6349	2	2	2	126	13.9	10.32	7.78	2		NP_619790.1
20336754	histone H2B type 1-J [Homo sapiens]	20.6349	2	2	2	126	13.9	10.32	7.78	2		NP_066402.2
21166389	histone H2B type 1-C/E/F/G/I [Homo sapiens]	20.6349	2	2	2	126	13.9	10.32	7.78	2		NP_003517.2
21361322	tubulin beta-4A chain isoform 3 [Homo sapiens]	26.3514	10	11	8	444	49.6	4.88	46.23	10		NP_006078.2
21361565	ATP synthase F(0) complex subunit B1, mitochondrial precursor [Homo sapiens]	6.64062	2	3	2	256	28.9	9.36	12.6	2		NP_001679.2
21361657	protein disulfide-isomerase A3 precursor [Homo sapiens]	26.1386	12	13	12	505	56.7	6.35	43.37	12		NP_005304.3
21464101	14-3-3 protein gamma [Homo sapiens]	9.7166	2	2	1	247	28.3	4.89	6.71	2		NP_036611.2
21536301	signal transducer and activator of transcription 1-alpha/beta isoform beta [Homo sapiens]	10.5337	6	6	6	712	83	6.42	23.23	6		NP_644671.1
21735621	malate dehydrogenase, mitochondrial isoform 1 precursor [Homo sapiens]	7.39645	2	2	2	338	35.5	8.68	7.28	2		NP_005909.2
22538437	cathepsin B preproprotein [Homo sapiens]	9.14454	2	2	2	339	37.8	6.3	7.74	2		NP_680093.1
23308577	D-3-phosphoglycerate dehydrogenase [Homo sapiens]	3.75235	2	2	2	533	56.6	6.71	6.43	2		NP_006614.2
23618867	sideroflexin-1 [Homo sapiens]	8.69565	2	2	2	322	35.6	9.07	8.24	2		NP_073591.2
24234686	heat shock cognate 71 kDa protein isoform 2 [Homo sapiens]	18.4584	7	8	6	493	53.5	5.86	26.75	7		NP_694881.1
24234688	stress-70 protein, mitochondrial precursor [Homo sapiens]	16.053	7	7	7	679	73.6	6.16	25.08	7		NP_004125.3
24308201	adipocyte plasma membrane-associated protein [Homo sapiens]	18.0288	7	7	7	416	46.5	6.16	22.16	7		NP_065392.1
24430192	keratin, type I cytoskeletal 16 [Homo sapiens]	3.8055	2	2	2	473	51.2	5.05	6.23	2		NP_005548.2
24475816	very-long-chain enoyl-CoA reductase [Homo sapiens]	6.81818	2	2	2	308	36	9.45	7.75	2		NP_612510.1
24638454	sarcoplasmic/endoplasmic reticulum calcium ATPase 2 isoform b [Homo sapiens]	2.68714	2	2	2	1042	114.7	5.34	6.9	2		NP_733765.1
24797067	HLA class I histocompatibility antigen, A-1 alpha chain precursor [Homo sapiens]	13.9726	3	3	3	365	40.8	6	11.91	3		NP_002107.3
27894317	interleukin-1 receptor antagonist protein isoform 2 [Homo sapiens]	12.2222	2	2	2	180	19.9	4.81	6.47	2		NP_776213.1
27894319	interleukin-1 receptor antagonist protein isoform 1 precursor [Homo sapiens]	12.4294	2	2	2	177	20	6.19	6.47	2		NP_776214.1
28173554	histone H2B type 3-B [Homo sapiens]	20.6349	2	2	2	126	13.9	10.32	7.78	2		NP_778225.1
28178832	isocitrate dehydrogenase [NADP], mitochondrial isoform 1 precursor [Homo sapiens]	4.86726	2	2	2	452	50.9	8.69	7.58	2		NP_002159.2
29788768	tubulin beta-2B chain [Homo sapiens]	14.6067	7	8	5	445	49.9	4.89	34.09	7		NP_821080.1
29788785	tubulin beta chain isoform b [Homo sapiens]	33.3333	12	13	0	444	49.6	4.89	54.25	12		NP_821133.1
30410792	proteasome activator complex subunit 2 [Homo sapiens]	11.7155	2	2	2	239	27.4	5.73	8.89	2		NP_002809.2
30581141	proteasome activator complex subunit 1 isoform 2 [Homo sapiens]	8.4	2	2	2	250	28.6	6.71	6.56	2		NP_788955.1
32189394	ATP synthase subunit beta, mitochondrial precursor [Homo sapiens]	10.0189	3	4	3	529	56.5	5.4	18.51	3		NP_001677.2
32455260	peroxiredoxin-5, mitochondrial isoform b precursor [Homo sapiens]	20	2	2	2	170	17.4	8.76	8.93	2		NP_857634.1
32455262	peroxiredoxin-5, mitochondrial isoform c precursor [Homo sapiens]	27.2	2	2	2	125	12.8	9.14	8.93	2		NP_857635.1
32567786	keratin, type II cytoskeletal 79 [Homo sapiens]	3.92523	2	2	0	535	57.8	7.2	4.01	2		NP_787028.1
32996709	transmembrane emp24 domain-containing protein 7 precursor [Homo sapiens]	30.8036	4	4	4	224	25.2	6.89	17.65	4		NP_861974.1
33286418	pyruvate kinase PKM isoform a [Homo sapiens]	5.64972	2	2	2	531	57.9	7.84	8.59	2		NP_002645.3
33286422	pyruvate kinase PKM isoform b [Homo sapiens]	5.64972	2	2	2	531	58	7.71	8.59	2		NP_872271.1
33457308	transmembrane emp24 domain-containing protein 4 isoform 1 precursor [Homo sapiens]	31.2775	5	5	4	227	25.9	8.28	14.28	5		NP_872353.2
34147513	ras-related protein Rab-7a [Homo sapiens]	12.0773	2	3	2	207	23.5	6.7	12.33	2		NP_004628.4
34147630	elongation factor Tu, mitochondrial precursor [Homo sapiens]	4.83516	2	2	2	455	49.8	7.61	6.48	2		NP_003312.3
37574726	BH3-interacting domain death agonist isoform 1 [Homo sapiens]	9.12863	2	2	2	241	26.8	7.08	6	2		NP_932070.1
38016911	erythrocyte band 7 integral membrane protein isoform a [Homo sapiens]	6.94444	2	2	2	288	31.7	7.88	7.17	2		NP_004090.4
38176151	protein lunapark isoform 4 [Homo sapiens]	11.4486	2	2	2	428	47.7	5.11	7.54	2		NP_085153.1
38372919	basigin isoform 1 precursor [Homo sapiens]	6.49351	2	2	2	385	42.2	5.66	6.74	2		NP_001719.2
38372921	basigin isoform 3 [Homo sapiens]	14.2045	2	2	2	176	19.4	6.68	6.74	2		NP_940992.1
38372923	basigin isoform 4 [Homo sapiens]	12.1951	2	2	2	205	22.8	5.47	6.74	2		NP_940993.1
38372925	basigin isoform 2 [Homo sapiens]	9.29368	2	2	2	269	29.2	5.64	6.74	2		NP_940991.1
39725636	transmembrane emp24 domain-containing protein 9 precursor [Homo sapiens]	14.8936	3	3	2	235	27.3	8.02	10.08	3		NP_059980.2
41399285	60 kDa heat shock protein, mitochondrial [Homo sapiens]	20.7679	9	9	9	573	61	5.87	30.04	9		NP_955472.1
42544185	galectin-8 isoform a [Homo sapiens]	13.3705	3	3	3	359	40.4	9.01	11.63	3		NP_006490.3
42544191	galectin-8 isoform b [Homo sapiens]	15.142	3	3	3	317	35.8	8.25	11.63	3		NP_963838.1
42558279	tubulin beta-8 chain [Homo sapiens]	17.3423	6	7	6	444	49.7	4.89	28.45	6		NP_817124.1
45007007	2'-5'-oligoadenylate synthase 3 [Homo sapiens]	2.20791	2	2	2	1087	121.1	8.4	6.28	2		NP_006178.2
46409270	tubulin alpha-3E chain [Homo sapiens]	24.4444	7	7	7	450	49.9	5.1	22.28	7		NP_997195.1
47132620	keratin, type II cytoskeletal 2 epidermal [Homo sapiens]	15.9624	7	7	4	639	65.4	8	27.68	7		NP_000414.2
50345982	ATP synthase subunit alpha, mitochondrial isoform c [Homo sapiens]	36.1829	16	16	16	503	54.5	8.24	51.47	16		NP_001001935.1
50345984	ATP synthase subunit alpha, mitochondrial isoform a precursor [Homo sapiens]	35.2622	17	17	17	553	59.7	9.13	54.89	17		NP_001001937.1
50592988	cytochrome b-c1 complex subunit 2, mitochondrial precursor [Homo sapiens]	7.72627	3	3	3	453	48.4	8.63	11.72	3		NP_003357.2
50592996	tubulin beta-3 chain isoform 1 [Homo sapiens]	13.5556	7	8	5	450	50.4	4.93	32.33	7		NP_006077.2
50845388	annexin A2 isoform 1 [Homo sapiens]	8.96359	3	3	3	357	40.4	8.37	8.56	3		NP_001002858.1
52630342	HLA class I histocompatibility antigen, Cw-1 alpha chain precursor [Homo sapiens]	9.01639	2	2	0	366	40.6	6.04	6.14	2		NP_002108.4
54607043	glucosylceramidase isoform 1 precursor [Homo sapiens]	7.27612	4	4	4	536	59.7	7.61	9.25	4		NP_000148.2
55749577	ADP/ATP translocase 1 [Homo sapiens]	6.71141	2	2	0	298	33	9.76	5.18	2		NP_001142.2
55956899	keratin, type I cytoskeletal 9 [Homo sapiens]	20.3852	7	8	7	623	62	5.24	40.02	7		NP_000217.2
56549119	dynamin-2 isoform 3 [Homo sapiens]	1.84758	2	2	2	866	97.6	7.64	5.16	2		NP_004936.2
56549121	dynamin-2 isoform 1 [Homo sapiens]	1.83908	2	2	2	870	98	7.44	5.16	2		NP_001005360.1
56549123	dynamin-2 isoform 2 [Homo sapiens]	1.83908	2	2	2	870	97.9	7.46	5.16	2		NP_001005361.1
56549125	dynamin-2 isoform 4 [Homo sapiens]	1.84758	2	2	2	866	97.5	7.65	5.16	2		NP_001005362.1
57013276	tubulin alpha-1B chain [Homo sapiens]	28.6031	9	9	9	451	50.1	5.06	29.36	9		NP_006073.2
63055057	beta-actin-like protein 2 [Homo sapiens]	13.5638	5	10	0	376	42	5.59	28.96	5		NP_001017992.1
63252886	prolyl 4-hydroxylase subunit alpha-1 isoform 1 precursor [Homo sapiens]	6.92884	3	3	3	534	60.9	6.01	8.44	3		NP_000908.2
66912162	histone H2B type 2-F isoform a [Homo sapiens]	20.6349	2	2	2	126	13.9	10.32	7.78	2		NP_001019770.1
68160937	E3 ubiquitin/ISG15 ligase TRIM25 [Homo sapiens]	6.19048	3	3	3	630	70.9	8.09	13.78	3		NP_005073.2
68508957	liver carboxylesterase 1 isoform c precursor [Homo sapiens]	36.7491	13	13	13	566	62.4	6.6	43.6	13		NP_001257.4
68508965	liver carboxylesterase 1 isoform b precursor [Homo sapiens]	36.6843	13	13	13	567	62.5	6.6	43.6	13		NP_001020365.1
68508967	liver carboxylesterase 1 isoform a precursor [Homo sapiens]	36.6197	13	13	13	568	62.6	6.6	43.6	13		NP_001020366.1
71773329	annexin A6 isoform 1 [Homo sapiens]	3.71471	2	2	2	673	75.8	5.6	5.9	2		NP_001146.2
78000183	60S ribosomal protein L14 [Homo sapiens]	11.1628	2	2	2	215	23.4	10.93	4.65	2		NP_001030168.1
88501734	integrin alpha-M isoform 2 precursor [Homo sapiens]	10.7639	10	12	10	1152	127.1	7.23	47.89	10		NP_000623.2
88999583	myosin light polypeptide 6 isoform 2 [Homo sapiens]	46.3576	4	5	4	151	17	4.55	19.5	4		NP_524147.2
92091583	myosin-11 isoform SM2B [Homo sapiens]	1.23393	2	3	2	1945	224.2	5.53	13.64	2		NP_001035202.1
92091586	myosin-11 isoform SM1B [Homo sapiens]	1.21273	2	3	2	1979	227.9	5.5	13.64	2		NP_001035203.1
94721250	vesicle-associated membrane protein-associated protein A isoform 1 [Homo sapiens]	11.5646	3	5	3	294	32.6	8.91	18.82	3		NP_003565.4
94721252	vesicle-associated membrane protein-associated protein A isoform 2 [Homo sapiens]	13.6546	3	5	3	249	27.9	8.62	18.82	3		NP_919415.2
102469694	galectin-9 isoform short [Homo sapiens]	9.28793	2	2	2	323	35.9	8.13	7.78	2		NP_002299.2
110224476	prosaposin isoform b preproprotein [Homo sapiens]	6.83112	2	2	2	527	58.4	5.14	9.67	2		NP_001035930.1
110224479	prosaposin isoform c preproprotein [Homo sapiens]	6.84411	2	2	2	526	58.3	5.14	9.67	2		NP_001035931.1
111494237	galectin-9B [Homo sapiens]	8.4507	2	2	2	355	39.5	9.52	7.78	2		NP_001036150.1
111494239	galectin-9C [Homo sapiens]	8.42697	2	2	2	356	39.6	9.19	7.78	2		NP_001035167.2
111494251	rho-related GTP-binding protein RhoC precursor [Homo sapiens]	14.5078	3	3	3	193	22	6.58	9.36	3		NP_001036144.1
115430223	galectin-3 isoform 1 [Homo sapiens]	32.4	7	7	7	250	26.1	8.56	10.05	7		NP_002297.2
116284394	myosin-14 isoform 2 [Homo sapiens]	1.40351	3	3	0	1995	227.7	5.6	7.16	3		NP_079005.3
117190174	heterogeneous nuclear ribonucleoproteins C1/C2 isoform b [Homo sapiens]	9.21502	2	2	2	293	32.3	5.08	7.48	2		NP_004491.2
119395750	keratin, type II cytoskeletal 1 [Homo sapiens]	27.9503	10	11	9	644	66	8.12	55.95	10		NP_006112.3
119395754	keratin, type II cytoskeletal 5 [Homo sapiens]	3.55932	2	2	0	590	62.3	7.74	4.01	2		NP_000415.2
119703753	keratin, type II cytoskeletal 6B [Homo sapiens]	5.49645	3	3	0	564	60	8	8.05	3		NP_005546.2
134133226	POTE ankyrin domain family member E [Homo sapiens]	5.67442	5	7	1	1075	121.3	6.2	25.24	5		NP_001077007.1
148536853	coatomer subunit alpha isoform 2 [Homo sapiens]	6.86275	5	5	5	1224	138.3	7.66	21.81	5		NP_004362.2
148536855	coatomer subunit alpha isoform 1 [Homo sapiens]	6.81265	5	5	5	1233	139.2	7.59	21.81	5		NP_001091868.1
153791158	keratin, type II cytoskeletal 75 [Homo sapiens]	3.81125	2	2	0	551	59.5	7.74	4.01	2		NP_004684.2
153791352	POTE ankyrin domain family member F [Homo sapiens]	5.67442	5	7	1	1075	121.4	6.2	25.24	5		NP_001093241.1
153792590	heat shock protein HSP 90-alpha isoform 1 [Homo sapiens]	5.26932	4	5	1	854	98.1	5.16	14.21	4		NP_001017963.2
154146191	heat shock protein HSP 90-alpha isoform 2 [Homo sapiens]	6.14754	4	5	1	732	84.6	5.02	14.21	4		NP_005339.3
154354962	MICOS complex subunit MIC60 isoform 2 [Homo sapiens]	26.6843	15	15	15	757	83.5	6.57	43.37	15		NP_001093639.1
154354964	MICOS complex subunit MIC60 isoform 1 [Homo sapiens]	26.6491	15	15	15	758	83.6	6.48	43.37	15		NP_006830.2
154354966	MICOS complex subunit MIC60 isoform 3 [Homo sapiens]	27.0415	15	15	15	747	82.6	6.57	43.37	15		NP_001093640.1
155969697	keratin, type II cytoskeletal 6C [Homo sapiens]	6.73759	3	3	1	564	60	8	8.28	3		NP_775109.2
156071459	ADP/ATP translocase 2 [Homo sapiens]	10.0671	3	3	1	298	32.8	9.69	5.18	3		NP_001143.2
156071462	ADP/ATP translocase 3 [Homo sapiens]	11.0738	3	3	1	298	32.8	9.74	10.05	3		NP_001627.2
157412270	heterogeneous nuclear ribonucleoprotein M isoform b [Homo sapiens]	4.92041	3	3	3	691	73.6	8.82	8.72	3		NP_112480.2
161702986	ezrin [Homo sapiens]	3.58362	2	2	2	586	69.4	6.27	6.18	2		NP_001104547.1
167466198	intercellular adhesion molecule 1 precursor [Homo sapiens]	10.7143	4	4	4	532	57.8	7.99	14.14	4		NP_000192.2
167614506	plastin-2 [Homo sapiens]	31.26	12	15	12	627	70.2	5.43	59.82	12		NP_002289.2
170932494	syntaxin-7 [Homo sapiens]	9.57854	2	2	2	261	29.8	5.55	9.07	2		NP_003560.2
189011546	acid ceramidase isoform b [Homo sapiens]	16.0584	4	4	4	411	46.5	7.85	12.35	4		NP_004306.3
189011548	acid ceramidase isoform a preproprotein [Homo sapiens]	16.7089	4	4	4	395	44.6	7.62	12.35	4		NP_808592.2
189011550	acid ceramidase isoform c [Homo sapiens]	16.9666	4	4	4	389	44	7.62	12.35	4		NP_001120977.1
189083776	gelsolin isoform b [Homo sapiens]	14.3639	6	6	6	731	80.6	5.85	26.98	6		NP_001121136.1
189181759	electron transfer flavoprotein subunit alpha, mitochondrial isoform b [Homo sapiens]	16.1972	2	2	2	284	30	8.57	9.25	2		NP_001121188.1
190358517	ras-related protein Rab-11B [Homo sapiens]	9.63303	2	2	2	218	24.5	5.94	5.48	2		NP_004209.2
190885499	cytochrome c oxidase subunit 5A, mitochondrial precursor [Homo sapiens]	32.6667	6	8	6	150	16.8	6.79	26.91	6		NP_004246.2
194018511	keratin, type II cytoskeletal 1b [Homo sapiens]	3.63322	2	2	0	578	61.9	5.99	4.9	2		NP_778253.2
195972866	keratin, type I cytoskeletal 10 [Homo sapiens]	31.5068	12	12	12	584	58.8	5.21	48.11	12		NP_000412.3
197927201	mitochondrial import receptor subunit TOM6 homolog [Homo sapiens]	32.4324	2	2	2	74	8	4.89	6.32	2		NP_001127965.1
207028494	L-lactate dehydrogenase A chain isoform 2 [Homo sapiens]	27.0073	5	6	4	274	30.2	7.15	23.49	5		NP_001128711.1
209862831	annexin A2 isoform 2 [Homo sapiens]	9.43953	3	3	3	339	38.6	7.75	8.56	3		NP_001129487.1
209915581	60S ribosomal protein L28 isoform 1 [Homo sapiens]	19.0184	2	2	2	163	18.4	10.78	7.5	2		NP_001129606.1
209915584	60S ribosomal protein L28 isoform 3 [Homo sapiens]	18.3432	2	2	2	169	19.1	10.83	7.5	2		NP_001129607.1
209915586	60S ribosomal protein L28 isoform 4 [Homo sapiens]	35.6322	2	2	2	87	10.1	10.67	7.5	2		NP_001129608.1
209915588	60S ribosomal protein L28 isoform 5 [Homo sapiens]	44.9275	2	2	2	69	7.9	10.7	7.5	2		NP_001129609.1
214830451	sequestosome-1 isoform 2 [Homo sapiens]	10.6742	2	2	2	356	38.6	5.47	8.79	2		NP_001135771.1
217272849	prolyl 4-hydroxylase subunit alpha-1 isoform 2 precursor [Homo sapiens]	6.92884	3	3	3	534	61	6.01	8.44	3		NP_001136067.1
217272851	prolyl 4-hydroxylase subunit alpha-1 isoform 3 precursor [Homo sapiens]	7.17054	3	3	3	516	58.9	6.02	8.44	3		NP_001136068.1
221316659	leupaxin isoform 1 [Homo sapiens]	9.71867	2	2	2	391	43.7	6.18	7.86	2		NP_001137467.1
224831239	integrin alpha-M isoform 1 precursor [Homo sapiens]	10.7546	10	12	10	1153	127.2	7.23	47.89	10		NP_001139280.1
224831241	myosin-14 isoform 3 [Homo sapiens]	1.37525	3	3	0	2036	231.9	5.6	7.16	3		NP_001139281.1
225637520	semaphorin-7A isoform 2 preproprotein [Homo sapiens]	3.98773	2	2	2	652	73.3	7.42	7.59	2		NP_001139501.1
238624110	histone H2B type 2-F isoform b [Homo sapiens]	19.403	2	2	2	134	14.8	10.35	7.78	2		NP_001154806.1
255958282	perilipin-3 isoform 1 [Homo sapiens]	5.99078	2	2	2	434	47	5.44	8.52	2		NP_005808.3
255958289	perilipin-3 isoform 2 [Homo sapiens]	6.00462	2	2	2	433	46.9	5.44	8.52	2		NP_001157661.1
255958306	perilipin-3 isoform 3 [Homo sapiens]	6.16114	2	2	2	422	45.8	5.43	8.52	2		NP_001157666.1
256985100	TRAM adaptor with GOLD domain isoform 1 precursor [Homo sapiens]	17.0792	4	4	4	404	46.1	5.12	17.65	4		NP_001157940.1
256985102	TRAM adaptor with GOLD domain isoform 2 precursor [Homo sapiens]	36.7021	4	4	4	188	21.2	6.2	17.65	4		NP_001157941.1
260099723	L-lactate dehydrogenase A chain isoform 3 [Homo sapiens]	31.5789	9	11	8	361	39.8	8.43	43.38	9		NP_001158886.1
260099725	L-lactate dehydrogenase A chain isoform 4 [Homo sapiens]	18.9781	5	7	4	274	30	8	27.57	5		NP_001158887.1
260099727	L-lactate dehydrogenase A chain isoform 5 [Homo sapiens]	21.5768	5	7	4	241	26.7	8.15	27.57	5		NP_001158888.1
284807150	glucosylceramidase isoform 2 [Homo sapiens]	8.68597	4	4	4	449	50.3	7.15	9.25	4		NP_001165282.1
284807152	glucosylceramidase isoform 3 precursor [Homo sapiens]	5.13347	3	3	3	487	54.4	7.61	4.38	3		NP_001165283.1
285395246	tubulin alpha chain-like 3 isoform 2 [Homo sapiens]	2.70936	2	2	2	406	45.5	6.32	4.56	2		NP_001165335.1
291575128	L-lactate dehydrogenase B chain [Homo sapiens]	16.4671	5	6	4	334	36.6	6.05	20.65	5		NP_001167568.1
294345475	galectin-3 isoform 2 [Homo sapiens]	16.5	3	3	3	200	20.5	8.57	2.32	3		NP_001170859.1
299758394	dynamin-2 isoform 5 [Homo sapiens]	1.8412	2	2	2	869	97.9	7.44	5.16	2		NP_001177645.1
301171345	tubulin alpha-8 chain isoform 2 [Homo sapiens]	16.7102	5	5	5	383	42.9	5.08	12.88	5		NP_001180343.1
302129652	annexin A6 isoform 2 [Homo sapiens]	3.90016	2	2	2	641	72.4	5.6	5.9	2		NP_001180473.1
308235963	tubulin beta-3 chain isoform 2 [Homo sapiens]	11.1111	5	6	5	378	42.4	4.96	21.47	5		NP_001184110.1
315221152	60S ribosomal protein L11 isoform 2 [Homo sapiens]	12.4294	2	2	2	177	20.1	9.6	6.85	2		NP_001186731.1
315570273	actin, gamma-enteric smooth muscle isoform 2 precursor [Homo sapiens]	22.5225	8	11	0	333	37.1	5.54	29.33	8		NP_001186822.1
316659409	actin, cytoplasmic 2 [Homo sapiens]	47.7333	17	27	4	375	41.8	5.48	89.28	17		NP_001186883.1
319996655	c-myc promoter-binding protein-1 isoform MBP-1 [Homo sapiens]	7.33138	2	2	2	341	36.9	6.28	7.71	2		NP_001188412.1
332164775	pyruvate kinase PKM isoform c [Homo sapiens]	4.95868	2	2	2	605	65.9	7.87	8.59	2		NP_001193725.1
332164777	pyruvate kinase PKM isoform d [Homo sapiens]	6.56455	2	2	2	457	49.9	7.83	8.59	2		NP_001193726.1
332164781	pyruvate kinase PKM isoform f [Homo sapiens]	5.59701	2	2	2	536	58.5	7.71	8.59	2		NP_001193728.1
332205939	ras-related protein Rab-11A isoform 2 [Homo sapiens]	13.5484	2	2	2	155	17.6	8.85	5.48	2		NP_001193765.1
337752170	HLA class I histocompatibility antigen, A-1 alpha chain precursor [Homo sapiens]	13.9726	3	3	3	365	40.8	6.54	11.91	3		NP_001229687.1
339882741	HLA class I histocompatibility antigen, Cw-1 alpha chain precursor [Homo sapiens]	9.01639	2	2	0	366	40.7	5.87	6.14	2		NP_001229971.1
342187211	fructose-bisphosphate aldolase A isoform 2 [Homo sapiens]	8.37321	3	3	3	418	45.2	8.25	9.9	3		NP_001230106.1
347300416	BH3-interacting domain death agonist isoform 3 [Homo sapiens]	22.2222	2	2	2	99	11.3	9.69	6	2		NP_001231498.1
367460087	myosin-10 isoform 2 [Homo sapiens]	2.53036	5	5	5	1976	228.9	5.54	10.26	5		NP_005955.3
367460090	myosin-10 isoform 3 [Homo sapiens]	2.51889	5	5	5	1985	229.9	5.57	10.26	5		NP_001243024.1
371502127	macrophage-capping protein isoform 2 [Homo sapiens]	7.50751	2	2	2	333	36.8	7.2	8.23	2		NP_001243069.1
378404908	glyceraldehyde-3-phosphate dehydrogenase isoform 2 [Homo sapiens]	20.4778	4	4	4	293	31.5	7.61	15.59	4		NP_001243728.1
378548190	40S ribosomal protein S3 isoform 1 [Homo sapiens]	16.0494	3	3	3	243	26.7	9.66	12.36	3		NP_001243731.1
380837121	vesicle-trafficking protein SEC22b precursor [Homo sapiens]	20	2	2	2	215	24.7	8.51	7.16	2		NP_004883.3
382546007	ATP synthase subunit alpha, mitochondrial isoform b precursor [Homo sapiens]	31.2618	14	14	14	531	57.5	9.29	43.93	14		NP_001244263.1
384475528	gelsolin isoform d [Homo sapiens]	14.0374	6	6	6	748	82.5	5.63	26.98	6		NP_001244958.1
386781571	radixin isoform 1 [Homo sapiens]	3.47682	2	2	2	604	71	6.71	6.18	2		NP_001247422.1
386781587	radixin isoform 3 [Homo sapiens]	4.69799	2	2	2	447	52.6	6.16	6.18	2		NP_001247423.1
386869503	40S ribosomal protein S3 isoform 2 [Homo sapiens]	15.0579	3	3	3	259	28.5	9.73	12.36	3		NP_001247435.1
386869506	40S ribosomal protein S3 isoform 3 [Homo sapiens]	22.2222	2	2	2	117	12.6	9.28	7.95	2		NP_001247436.1
390517030	gelsolin isoform f [Homo sapiens]	13.6897	6	6	6	767	84.7	5.83	26.98	6		NP_001121135.2
392494079	lipoamide acyltransferase component of branched-chain alpha-keto acid dehydrogenase complex, mitochondrial precursor [Homo sapiens]	10.7884	4	4	4	482	53.5	8.51	13.3	4		NP_001909.3
393715091	tubulin alpha-1A chain isoform 1 [Homo sapiens]	28.6031	9	9	9	451	50.1	5.06	29.36	9		NP_001257328.1
393715095	tubulin alpha-1A chain isoform 2 [Homo sapiens]	31.0096	9	9	9	416	46.3	5.08	29.36	9		NP_001257329.1
395132436	60S ribosomal protein L18 isoform 2 [Homo sapiens]	21.3836	3	3	3	159	18.1	11.84	11.34	3		NP_001257419.1
409971425	brain acid soluble protein 1 [Homo sapiens]	18.9427	2	2	2	227	22.7	4.63	8.75	2		NP_001258535.1
427918083	gelsolin isoform e [Homo sapiens]	14.2084	6	6	6	739	81.4	5.85	26.98	6		NP_001244959.1
431822401	heat shock protein HSP 90-beta isoform a [Homo sapiens]	13.3978	8	9	5	724	83.2	5.03	23.33	8		NP_001258898.1
431822406	heat shock protein HSP 90-beta isoform b [Homo sapiens]	10.9467	6	6	4	676	78.2	5.05	13.76	6		NP_001258900.1
431822408	heat shock protein HSP 90-beta isoform c [Homo sapiens]	13.5854	8	9	5	714	82.3	5.06	23.33	8		NP_001258901.1
459352730	POTE ankyrin domain family member J [Homo sapiens]	3.27553	3	4	1	1038	117.3	5.97	13.74	3		NP_001264012.1
475808427	POTE ankyrin domain family member I [Homo sapiens]	4.18605	4	6	1	1075	121.2	6.21	19.96	4		NP_001264335.1
528078353	proteasome activator complex subunit 1 isoform 3 [Homo sapiens]	9.01288	2	2	2	233	26.9	5.78	6.56	2		NP_001268457.1
528078355	proteasome activator complex subunit 1 isoform 4 [Homo sapiens]	8.05085	2	2	2	236	27.2	5.83	6.2	2		NP_001268458.1
528281411	trifunctional enzyme subunit beta, mitochondrial isoform 2 precursor [Homo sapiens]	7.84314	2	2	2	459	49.6	9.42	6.23	2		NP_001268441.1
530361961	PREDICTED: lipoamide acyltransferase component of branched-chain alpha-keto acid dehydrogenase complex, mitochondrial isoform X1 [Homo sapiens]	14.6179	3	3	3	301	33	8.84	10.59	3		XP_005270602.1
530367168	PREDICTED: MICOS complex subunit MIC60 isoform X1 [Homo sapiens]	27.0777	15	15	15	746	82.4	6.65	43.37	15		XP_005264167.1
530367174	PREDICTED: MICOS complex subunit MIC60 isoform X2 [Homo sapiens]	24.9311	13	13	13	726	80	6.74	37.89	13		XP_005264170.1
530367176	PREDICTED: MICOS complex subunit MIC60 isoform X3 [Homo sapiens]	25.3147	13	13	13	715	78.9	6.86	37.89	13		XP_005264171.1
530370916	PREDICTED: tubulin alpha-4A chain isoform X1 [Homo sapiens]	24.0185	7	7	7	433	48.3	5.01	20.77	7		XP_005246889.1
530371010	PREDICTED: protein lunapark isoform X2 [Homo sapiens]	12.8609	2	2	2	381	42.6	9.26	7.54	2		XP_005246935.1
530371014	PREDICTED: protein lunapark isoform X4 [Homo sapiens]	15.8065	2	2	2	310	33.6	4.75	7.54	2		XP_005246937.1
530380520	PREDICTED: annexin A6 isoform X1 [Homo sapiens]	3.74813	2	2	2	667	75.2	5.67	5.9	2		XP_005268489.1
530381854	PREDICTED: histone H2B type 1-D isoform X1 [Homo sapiens]	17.3333	2	2	2	150	16.3	10.32	7.78	2		XP_005249096.1
530384720	PREDICTED: heterogeneous nuclear ribonucleoproteins A2/B1 isoform X1 [Homo sapiens]	11.6147	3	3	3	353	37.4	8.95	7.61	3		XP_005249786.1
530387776	PREDICTED: acid ceramidase isoform X1 [Homo sapiens]	17.6944	4	4	4	373	42.6	6.9	12.35	4		XP_005273561.1
530391018	PREDICTED: gelsolin isoform X6 [Homo sapiens]	13.9628	6	6	6	752	82.8	5.85	26.98	6		XP_005251997.1
530401316	PREDICTED: 2'-5'-oligoadenylate synthase 3 isoform X1 [Homo sapiens]	2.20386	2	2	2	1089	121.4	8.44	6.28	2		XP_005253946.1
530405975	PREDICTED: pyruvate kinase PKM isoform X3 [Homo sapiens]	5.07614	2	2	2	591	64.5	8.02	8.59	2		XP_005254500.1
530410341	PREDICTED: myosin-10 isoform X1 [Homo sapiens]	2.49128	5	5	5	2007	232.4	5.55	10.26	5		XP_005256708.1
530410584	PREDICTED: galectin-9C isoform X1 [Homo sapiens]	8.4507	2	2	2	355	39.5	9.19	7.78	2		XP_005256826.1
530410586	PREDICTED: galectin-9C isoform X3 [Homo sapiens]	9.28793	2	2	2	323	35.9	8.38	7.78	2		XP_005256827.1
530412176	PREDICTED: keratin, type I cytoskeletal 10 isoform X1 [Homo sapiens]	29.4872	12	12	12	624	63.3	5.26	48.11	12		XP_005257400.1
530416988	PREDICTED: 60S ribosomal protein L28 isoform X1 [Homo sapiens]	18.2353	2	2	2	170	19.1	11.46	7.5	2		XP_005259189.1
530421753	PREDICTED: moesin isoform X2 [Homo sapiens]	6.40138	3	3	3	578	67.9	6.28	10.29	3		XP_005262326.1
530423536	PREDICTED: liver carboxylesterase 1 isoform X1 [Homo sapiens]	36.6843	13	13	13	567	62.4	6.6	43.6	13		XP_005255831.1
530425819	PREDICTED: adipocyte plasma membrane-associated protein isoform X1 [Homo sapiens]	20.0692	5	5	5	289	32.1	5.85	16.97	5		XP_005260820.1
530427501	PREDICTED: heterogeneous nuclear ribonucleoprotein M isoform X1 [Homo sapiens]	4.75524	3	3	3	715	76	8.7	8.72	3		XP_005272535.1
530427503	PREDICTED: heterogeneous nuclear ribonucleoprotein M isoform X2 [Homo sapiens]	2.66854	2	2	2	712	75.6	8.57	4.73	2		XP_005272536.1
530427505	PREDICTED: heterogeneous nuclear ribonucleoprotein M isoform X3 [Homo sapiens]	5.02959	3	3	3	676	72.1	8.82	8.72	3		XP_005272537.1
530427507	PREDICTED: heterogeneous nuclear ribonucleoprotein M isoform X4 [Homo sapiens]	5.57377	3	3	3	610	64.4	8.76	8.72	3		XP_005272538.1
530427511	PREDICTED: heterogeneous nuclear ribonucleoprotein M isoform X5 [Homo sapiens]	5.95447	3	3	3	571	60.5	8.92	8.72	3		XP_005272540.1
530429121	PREDICTED: HLA class I histocompatibility antigen, A-1 alpha chain isoform X2 [Homo sapiens]	9.71867	2	2	2	391	44	6.64	7.59	2		XP_005275388.1
530430976	PREDICTED: liver carboxylesterase 1 isoform X1 [Homo sapiens]	36.6843	13	13	13	567	62.3	6.48	43.6	13		XP_005276924.1
538919948	malate dehydrogenase, mitochondrial isoform 3 [Homo sapiens]	10.8225	2	2	2	231	24.6	7.99	7.28	2		NP_001269333.1
543173169	guanine nucleotide-binding protein G(I)/G(S)/G(T) subunit beta-1 isoform 1 [Homo sapiens]	7.05882	2	2	2	340	37.4	6	2.43	2		NP_001269468.1
544186032	protein disulfide-isomerase A6 isoform a [Homo sapiens]	5.89431	2	2	2	492	53.9	5.33	8.9	2		NP_001269633.1
544186036	protein disulfide-isomerase A6 isoform c [Homo sapiens]	6.51685	2	2	2	445	48.6	5.08	8.9	2		NP_001269635.1
544186040	protein disulfide-isomerase A6 isoform e precursor [Homo sapiens]	6.63616	2	2	2	437	47.8	5.08	8.9	2		NP_001269636.1
544186046	protein disulfide-isomerase A6 isoform b [Homo sapiens]	5.94262	2	2	2	488	53.2	5.53	8.9	2		NP_001269634.1
559098406	stomatin-like protein 2, mitochondrial isoform b [Homo sapiens]	23.4727	3	3	3	311	33.3	8.25	13.37	3		NP_001273960.1
559098408	stomatin-like protein 2, mitochondrial isoform c [Homo sapiens]	28.1967	4	4	4	305	33.1	5.47	17.25	4		NP_001273961.1
559098453	stomatin-like protein 2, mitochondrial isoform d [Homo sapiens]	27.7419	4	4	4	310	33.4	5.63	17.25	4		NP_001273962.1
574584803	tubulin beta-4A chain isoform 1 [Homo sapiens]	23.2323	9	10	8	495	54.4	5.02	41.09	9		NP_001276052.1
574584811	tubulin beta-4A chain isoform 2 [Homo sapiens]	23.5174	9	10	8	489	53.8	4.98	41.09	9		NP_001276056.1
574584818	tubulin beta-4A chain isoform 4 [Homo sapiens]	22.3118	7	8	7	372	41.6	4.94	32.03	7		NP_001276059.1
578798587	PREDICTED: alpha-enolase isoform X1 [Homo sapiens]	8.75576	3	3	3	434	47.3	6.99	11.21	3		XP_006710496.1
578800966	PREDICTED: histone H2B type 2-F isoform X1 [Homo sapiens]	17.6871	2	2	2	147	16.1	9.96	7.78	2		XP_006711398.1
578800968	PREDICTED: histone H2B type 2-F isoform X2 [Homo sapiens]	20.3125	2	2	2	128	14.2	10.29	7.78	2		XP_006711399.1
578804259	PREDICTED: interleukin-1 receptor antagonist protein isoform X1 [Homo sapiens]	15.3846	2	2	2	143	16.1	4.88	6.47	2		XP_006712560.1
578804821	PREDICTED: signal transducer and activator of transcription 1-alpha/beta isoform X1 [Homo sapiens]	10	6	6	6	750	87.3	6.05	23.23	6		XP_006712781.1
578813467	PREDICTED: heterogeneous nuclear ribonucleoproteins A2/B1 isoform X2 [Homo sapiens]	13.099	3	3	3	313	33.9	9.03	7.61	3		XP_006715777.1
578813594	PREDICTED: actin, cytoplasmic 1 isoform X1 [Homo sapiens]	30.4348	8	9	2	253	28.2	5.34	22.83	8		XP_006715827.1
578818565	PREDICTED: vimentin isoform X1 [Homo sapiens]	5.5794	2	2	2	466	53.6	5.12	6.83	2		XP_006717563.1
578821890	PREDICTED: leupaxin isoform X2 [Homo sapiens]	13.1034	2	2	2	290	32.6	7.33	7.86	2		XP_006718813.1
578822859	PREDICTED: L-lactate dehydrogenase B chain isoform X1 [Homo sapiens]	9.91501	3	4	2	353	39.4	8.9	13.65	3		XP_006719137.1
578824099	PREDICTED: 60S ribosomal protein L6 isoform X1 [Homo sapiens]	10.7639	4	4	4	288	32.7	10.58	9.86	4		XP_006719611.1
578825850	PREDICTED: phosphoenolpyruvate carboxykinase [GTP], mitochondrial isoform X2 [Homo sapiens]	5.4326	2	2	2	497	53.6	8.18	6.37	2		XP_006720221.1
578825987	PREDICTED: proteasome activator complex subunit 2 isoform X1 [Homo sapiens]	17.284	2	2	2	162	18.5	6.7	8.89	2		XP_006720276.1
578827087	PREDICTED: pyruvate kinase PKM isoform X2 [Homo sapiens]	4.95868	2	2	2	605	65.8	7.99	8.59	2		XP_006720633.1
578830909	PREDICTED: galectin-9 isoform X1 [Homo sapiens]	9.6463	2	2	2	311	34.7	8.13	7.78	2		XP_006721955.1
578830911	PREDICTED: galectin-9 isoform X2 [Homo sapiens]	10.7914	2	2	2	278	30.4	9.55	7.78	2		XP_006721956.1
578830913	PREDICTED: galectin-9 isoform X3 [Homo sapiens]	12.1951	2	2	2	246	26.8	8.6	7.78	2		XP_006721957.1
578830915	PREDICTED: galectin-9 isoform X4 [Homo sapiens]	12.8205	2	2	2	234	25.6	8.6	7.78	2		XP_006721958.1
578836330	PREDICTED: histone H2B type F-S-like [Homo sapiens]	20.6349	2	2	2	126	13.9	10.37	7.78	2		XP_006723981.1
578836536	PREDICTED: integrin beta-2 isoform X1 [Homo sapiens]	4.57143	2	2	2	700	77.3	6.89	10.05	2		XP_006724064.1
578837316	PREDICTED: ras-related C3 botulinum toxin substrate 2 isoform X1 [Homo sapiens]	21.118	3	3	3	161	18	6.32	5.34	3		XP_006724349.1
578839332	PREDICTED: glucosylceramidase isoform X1 [Homo sapiens]	7.27612	4	4	4	536	59.6	7.42	9.25	4		XP_006726274.1
578841853	PREDICTED: major histocompatibility complex, class I, B isoform X5 [Homo sapiens]	10.6173	3	3	0	405	44.5	6.16	11.7	3		XP_006725968.1
578846900	PREDICTED: histone H2B type F-S-like [Homo sapiens]	20.6349	2	2	2	126	13.9	10.32	7.78	2		XP_006726868.1
614458221	phosphoenolpyruvate carboxykinase [GTP], mitochondrial isoform 1 precursor [Homo sapiens]	4.21875	2	2	2	640	70.7	7.62	6.37	2		NP_004554.3
614458223	phosphoenolpyruvate carboxykinase [GTP], mitochondrial isoform 2 precursor [Homo sapiens]	6.12245	2	2	2	441	47.5	8.13	6.37	2		NP_001018083.2
645912968	tubulin beta chain isoform a [Homo sapiens]	27.8017	10	11	0	464	52	4.96	43.39	10		NP_001280141.1
645912972	tubulin beta chain isoform c [Homo sapiens]	25.6198	5	5	3	242	27.3	4.5	20.29	5		NP_001280142.1
645912975	tubulin beta chain isoform d [Homo sapiens]	29.25	9	10	0	400	44.8	4.98	40	9		NP_001280143.1
645912980	tubulin beta chain isoform e [Homo sapiens]	31.4516	9	10	0	372	41.7	4.91	40	9		NP_001280144.1
661902998	heterogeneous nuclear ribonucleoprotein M isoform c [Homo sapiens]	5.71429	3	3	3	595	63	8.78	8.72	3		NP_001284347.1
665821274	peptidyl-prolyl cis-trans isomerase A isoform 2 [Homo sapiens]	62.8571	4	4	4	105	11.4	7.9	13.68	4		NP_001287910.1
733214499	transmembrane emp24 domain-containing protein 4 isoform 4 [Homo sapiens]	42.5197	4	4	4	127	14.4	7.12	9.68	4		NP_001289989.1
733215034	transmembrane emp24 domain-containing protein 4 isoform 5 [Homo sapiens]	32.1429	4	4	4	168	19.6	9	9.68	4		NP_001289991.1
733215142	transmembrane emp24 domain-containing protein 4 isoform 2 precursor [Homo sapiens]	38.172	5	5	4	186	20.8	6.87	14.28	5		NP_001289987.1
733215447	transmembrane emp24 domain-containing protein 4 isoform 3 precursor [Homo sapiens]	14.0449	2	2	1	178	20.1	8.91	6.58	2		NP_001289988.1
733605064	tubulin alpha-1C chain isoform b [Homo sapiens]	25.3623	8	8	8	414	46	5.12	24.61	8		NP_001290045.1
733605926	tubulin alpha-1C chain isoform a [Homo sapiens]	20.2312	8	8	8	519	57.7	5.07	24.61	8		NP_001290043.1
735367803	integrin beta-2 isoform 1 precursor [Homo sapiens]	5.46164	3	3	3	769	84.7	6.98	12.94	3		NP_001120963.2
746815975	tubulin beta-6 chain isoform 1 [Homo sapiens]	6.72646	4	5	4	446	49.8	4.88	17.68	4		NP_001290453.1
746815977	tubulin beta-6 chain isoform 5 [Homo sapiens]	7.87402	4	5	4	381	42.5	4.83	17.68	4		NP_001290457.1
746815999	tubulin beta-6 chain isoform 6 [Homo sapiens]	10	4	5	4	300	34.1	4.84	17.68	4		NP_001290459.1
746816060	tubulin beta-6 chain isoform 3 [Homo sapiens]	7.33496	4	5	4	409	45.7	4.84	17.68	4		NP_001290455.1
746816073	tubulin beta-6 chain isoform 4 [Homo sapiens]	8.02139	4	5	4	374	41.9	4.91	17.68	4		NP_001290456.1
756761757	protein lunapark isoform 5 [Homo sapiens]	16.0656	2	2	2	305	33	4.82	7.54	2		NP_001291940.1
756761773	protein lunapark isoform 1 precursor [Homo sapiens]	9.91903	2	2	2	494	54.8	5.07	7.54	2		NP_001291937.1
756761793	protein lunapark isoform 2 [Homo sapiens]	10.6754	2	2	2	459	50.8	5.08	7.54	2		NP_001291938.1
756992484	protein lunapark isoform 3 precursor [Homo sapiens]	11.3953	2	2	2	430	47.2	5.05	7.54	2		NP_001291939.1
767903710	PREDICTED: D-3-phosphoglycerate dehydrogenase isoform X1 [Homo sapiens]	3.29489	2	2	2	607	64.7	6.87	6.43	2		XP_011539528.1
767903712	PREDICTED: D-3-phosphoglycerate dehydrogenase isoform X2 [Homo sapiens]	3.44234	2	2	2	581	61.5	7.03	6.43	2		XP_011539529.1
767903714	PREDICTED: D-3-phosphoglycerate dehydrogenase isoform X3 [Homo sapiens]	3.50877	2	2	2	570	60.5	7.03	6.43	2		XP_011539530.1
767912428	PREDICTED: galectin-8 isoform X1 [Homo sapiens]	14.5897	3	3	3	329	36.8	9.44	11.63	3		XP_011542490.1
767913123	PREDICTED: protein disulfide-isomerase A6 isoform X1 [Homo sapiens]	7.21393	2	2	2	402	44.2	6.15	8.9	2		XP_011508610.1
767913703	PREDICTED: MICOS complex subunit MIC60 isoform X4 [Homo sapiens]	25.431	9	9	9	464	52.8	5.87	23.76	9		XP_011530799.1
767914416	PREDICTED: trifunctional enzyme subunit beta, mitochondrial isoform X1 [Homo sapiens]	7.59494	2	2	2	474	51.3	9.41	6.23	2		XP_011531105.1
767914418	PREDICTED: trifunctional enzyme subunit beta, mitochondrial isoform X2 [Homo sapiens]	7.9646	2	2	2	452	48.8	9.17	6.23	2		XP_011531106.1
767915282	PREDICTED: macrophage-capping protein isoform X1 [Homo sapiens]	7.18391	2	2	2	348	38.5	6.19	8.23	2		XP_011531424.1
767918223	PREDICTED: POTE ankyrin domain family member E isoform X1 [Homo sapiens]	6.37409	5	7	1	957	107.7	6.68	25.24	5		XP_011509518.1
767918225	PREDICTED: POTE ankyrin domain family member E isoform X2 [Homo sapiens]	6.53805	5	7	1	933	105	6.39	25.24	5		XP_011509519.1
767919342	PREDICTED: POTE ankyrin domain family member I isoform X1 [Homo sapiens]	4.14747	4	6	1	1085	122.4	6.2	19.96	4		XP_011509972.1
767919377	PREDICTED: POTE ankyrin domain family member J isoform X1 [Homo sapiens]	3.24427	3	4	1	1048	118.5	5.96	13.74	3		XP_011509985.1
767919570	PREDICTED: POTE ankyrin domain family member F isoform X2 [Homo sapiens]	5.804	5	7	1	1051	118.7	5.95	25.24	5		XP_011510064.1
767920009	PREDICTED: protein lunapark isoform X3 [Homo sapiens]	13.881	2	2	2	353	38.8	4.98	7.54	2		XP_011510247.1
767934332	PREDICTED: NAD(P) transhydrogenase, mitochondrial isoform X1 [Homo sapiens]	2.11786	2	2	2	1086	113.8	8.09	7.26	2		XP_011512303.1
767939897	PREDICTED: major histocompatibility complex, class I, B isoform X1 [Homo sapiens]	7.7748	2	2	2	373	41.2	5.73	7.01	2		XP_011512858.1
767939899	PREDICTED: major histocompatibility complex, class I, B isoform X7 [Homo sapiens]	8.97833	2	2	2	323	36.6	5.58	7.01	2		XP_011512859.1
767939943	PREDICTED: tubulin beta-2B chain isoform X1 [Homo sapiens]	12.3324	5	6	5	373	41.9	4.91	23.24	5		XP_011512873.1
767942082	PREDICTED: elongation factor 1-alpha 1 isoform X1 [Homo sapiens]	10.3896	4	6	4	462	50.1	9.01	22.02	4		XP_011533816.1
767943537	PREDICTED: ezrin isoform X1 [Homo sapiens]	4.66667	2	2	2	450	53.7	6.09	6.18	2		XP_011534412.1
767943698	PREDICTED: syntaxin-7 isoform X1 [Homo sapiens]	10.4603	2	2	2	239	27.4	5.12	9.07	2		XP_011534480.1
767948171	PREDICTED: MICOS complex subunit MIC19 isoform X1 [Homo sapiens]	44.8276	10	12	10	232	26.7	7.75	38.96	10		XP_011514665.1
767948173	PREDICTED: MICOS complex subunit MIC19 isoform X2 [Homo sapiens]	28.9855	3	3	3	138	15.5	8.63	12.69	3		XP_011514666.1
767948175	PREDICTED: MICOS complex subunit MIC19 isoform X3 [Homo sapiens]	25	2	2	2	124	14	5.06	9.21	2		XP_011514667.1
767957185	PREDICTED: gelsolin isoform X3 [Homo sapiens]	13.2075	6	6	6	795	87	6.28	26.98	6		XP_006717138.2
767957187	PREDICTED: gelsolin isoform X4 [Homo sapiens]	13.4615	6	6	6	780	86.1	5.83	26.98	6		XP_011516886.1
767957189	PREDICTED: gelsolin isoform X5 [Homo sapiens]	13.7976	6	6	6	761	83.8	5.63	26.98	6		XP_011516887.1
767957196	PREDICTED: gelsolin isoform X2 [Homo sapiens]	14.1509	6	6	6	742	81.9	5.85	26.98	6		XP_011516890.1
767957209	PREDICTED: gelsolin isoform X7 [Homo sapiens]	9.07504	3	3	3	573	62.8	5.82	14.84	3		XP_011516896.1
767960019	PREDICTED: tubulin beta-8 chain isoform X1 [Homo sapiens]	16.6667	5	6	5	372	41.8	4.87	25.11	5		XP_011517761.1
767960021	PREDICTED: tubulin beta-8 chain isoform X2 [Homo sapiens]	10.3093	4	5	4	291	33	4.84	17.68	4		XP_011517762.1
767967841	PREDICTED: peroxiredoxin-5, mitochondrial isoform X1 [Homo sapiens]	20.1183	2	2	2	169	17.5	8.97	8.93	2		XP_005273939.2
767969108	PREDICTED: leupaxin isoform X1 [Homo sapiens]	10.3825	2	2	2	366	41.6	7.84	7.86	2		XP_011543694.1
767970091	PREDICTED: heat shock cognate 71 kDa protein isoform X1 [Homo sapiens]	17.0279	9	11	8	646	70.9	5.52	35.66	9		XP_011541100.1
767974103	PREDICTED: keratin, type II cytoskeletal 1b isoform X2 [Homo sapiens]	6.52174	2	2	0	322	34.5	6.37	4.9	2		XP_011536591.1
767974397	PREDICTED: sarcoplasmic/endoplasmic reticulum calcium ATPase 2 isoform X1 [Homo sapiens]	2.8028	2	2	2	999	109.8	5.36	6.9	2		XP_011536704.1
767974399	PREDICTED: sarcoplasmic/endoplasmic reticulum calcium ATPase 2 isoform X2 [Homo sapiens]	3.30189	2	2	2	848	92.8	5.73	6.9	2		XP_011536705.1
767975060	PREDICTED: 60S ribosomal protein L6 isoform X2 [Homo sapiens]	17.5141	4	4	4	177	20.4	10.52	9.86	4		XP_011536949.1
767980428	PREDICTED: heterogeneous nuclear ribonucleoproteins C1/C2 isoform X1 [Homo sapiens]	8.82353	2	2	2	306	33.7	5.08	7.48	2		XP_011535013.1
767980445	PREDICTED: heat shock protein HSP 90-alpha isoform X1 [Homo sapiens]	5.2755	4	5	1	853	98	5.16	14.21	4		XP_011535020.1
767983911	PREDICTED: aminopeptidase N isoform X1 [Homo sapiens]	2.58532	2	2	2	967	109.5	5.48	7.41	2		XP_011519775.1
767983913	PREDICTED: aminopeptidase N isoform X2 [Homo sapiens]	3.72024	2	2	2	672	75.4	5.5	7.41	2		XP_011519776.1
767984412	PREDICTED: pyruvate kinase PKM isoform X4 [Homo sapiens]	5.30035	2	2	2	566	61.4	7.81	8.59	2		XP_011519972.1
767984414	PREDICTED: pyruvate kinase PKM isoform X5 [Homo sapiens]	5.30035	2	2	2	566	61.6	7.68	8.59	2		XP_011519973.1
767984416	PREDICTED: pyruvate kinase PKM isoform X6 [Homo sapiens]	5.43478	2	2	2	552	60.2	7.84	8.59	2		XP_011519974.1
767984418	PREDICTED: pyruvate kinase PKM isoform X7 [Homo sapiens]	5.43478	2	2	2	552	60.3	7.69	8.59	2		XP_011519975.1
767987246	PREDICTED: myosin-11 isoform X1 [Homo sapiens]	1.24417	2	3	2	1929	222.5	5.54	13.64	2		XP_011520804.1
767988216	PREDICTED: coronin-1A isoform X1 [Homo sapiens]	8.89371	4	4	4	461	51	6.68	12.5	4		XP_011544016.1
767988554	PREDICTED: integrin alpha-M isoform X1 [Homo sapiens]	10.1742	9	11	9	1091	120.4	7.47	44.23	9		XP_011544152.1
767989283	PREDICTED: liver carboxylesterase 1 isoform X2 [Homo sapiens]	34.0541	7	7	7	370	40.1	6.8	30	7		XP_011521118.1
767989403	PREDICTED: cytochrome c oxidase subunit 4 isoform 1, mitochondrial isoform X2 [Homo sapiens]	21.1429	3	3	3	175	20.1	9.6	8.47	3		XP_011521173.1
767991998	PREDICTED: galectin-9B isoform X1 [Homo sapiens]	8.42697	2	2	2	356	39.6	9.52	7.78	2		XP_006721568.2
767992000	PREDICTED: galectin-9B isoform X2 [Homo sapiens]	8.62069	2	2	2	348	39	9.76	7.78	2		XP_011522101.1
767992002	PREDICTED: galectin-9B isoform X3 [Homo sapiens]	9.25926	2	2	2	324	36	8.78	7.78	2		XP_011522102.1
767992004	PREDICTED: galectin-9B isoform X4 [Homo sapiens]	9.28793	2	2	2	323	35.9	8.78	7.78	2		XP_011522103.1
767992006	PREDICTED: galectin-9B isoform X5 [Homo sapiens]	9.61538	2	2	2	312	34.8	8.57	7.78	2		XP_011522104.1
767992008	PREDICTED: galectin-9B isoform X6 [Homo sapiens]	9.6463	2	2	2	311	34.7	8.57	7.78	2		XP_011522105.1
767992010	PREDICTED: galectin-9B isoform X7 [Homo sapiens]	9.86842	2	2	2	304	33.2	9.63	7.78	2		XP_011522106.1
767992012	PREDICTED: galectin-9B isoform X8 [Homo sapiens]	10.7527	2	2	2	279	30.6	9.77	7.78	2		XP_011522107.1
767992014	PREDICTED: galectin-9B isoform X9 [Homo sapiens]	10.7914	2	2	2	278	30.5	9.77	7.78	2		XP_011522108.1
767992016	PREDICTED: galectin-9B isoform X10 [Homo sapiens]	11.0294	2	2	2	272	29.9	10.23	7.78	2		XP_011522109.1
767992018	PREDICTED: galectin-9B isoform X11 [Homo sapiens]	11.194	2	2	2	268	30.2	9.77	7.78	2		XP_011522110.1
767992184	PREDICTED: myosin-10 isoform X2 [Homo sapiens]	2.45459	5	5	5	2037	235.7	5.6	10.26	5		XP_011522177.1
767992186	PREDICTED: myosin-10 isoform X3 [Homo sapiens]	2.4558	5	5	5	2036	235.6	5.6	10.26	5		XP_011522178.1
767992188	PREDICTED: myosin-10 isoform X4 [Homo sapiens]	2.4667	5	5	5	2027	234.5	5.57	10.26	5		XP_011522179.1
767992190	PREDICTED: myosin-10 isoform X5 [Homo sapiens]	2.48016	5	5	5	2016	233.3	5.62	10.26	5		XP_011522180.1
767992192	PREDICTED: myosin-10 isoform X6 [Homo sapiens]	2.48139	5	5	5	2015	233.2	5.62	10.26	5		XP_011522181.1
767992194	PREDICTED: myosin-10 isoform X7 [Homo sapiens]	2.49252	5	5	5	2006	232.2	5.58	10.26	5		XP_011522182.1
767992494	PREDICTED: galectin-9C isoform X2 [Homo sapiens]	9.25926	2	2	2	324	36	8.38	7.78	2		XP_011522295.1
767992496	PREDICTED: galectin-9C isoform X4 [Homo sapiens]	9.61538	2	2	2	312	34.8	8.21	7.78	2		XP_011522296.1
767992498	PREDICTED: galectin-9C isoform X5 [Homo sapiens]	9.86842	2	2	2	304	33.1	9.29	7.78	2		XP_011522297.1
767992500	PREDICTED: galectin-9C isoform X6 [Homo sapiens]	11.194	2	2	2	268	30.2	9.77	7.78	2		XP_011522298.1
768000519	PREDICTED: ATP-dependent RNA helicase DDX39A isoform X1 [Homo sapiens]	7.72834	2	2	2	427	49.1	5.68	6.49	2		XP_011525922.1
768000524	PREDICTED: ATP-dependent RNA helicase DDX39A isoform X2 [Homo sapiens]	14.8649	2	2	2	222	26.1	5.97	6.49	2		XP_011525923.1
768011134	PREDICTED: myosin-14 isoform X2 [Homo sapiens]	1.37053	3	3	0	2043	232.9	5.68	7.16	3		XP_011525622.1
768011138	PREDICTED: myosin-14 isoform X3 [Homo sapiens]	1.37592	3	3	0	2035	232.2	5.68	7.16	3		XP_011525623.1
768011142	PREDICTED: myosin-14 isoform X4 [Homo sapiens]	1.39234	3	3	0	2011	229.4	5.66	7.16	3		XP_011525624.1
768011147	PREDICTED: myosin-14 isoform X1 [Homo sapiens]	1.3979	3	3	0	2003	228.5	5.6	7.16	3		XP_011525625.1
768024950	PREDICTED: myosin-9 isoform X1 [Homo sapiens]	16.8878	28	29	28	1960	226.4	5.6	93.33	28		XP_011528499.1
768037765	PREDICTED: moesin isoform X1 [Homo sapiens]	6.06557	3	3	3	610	71.3	6.06	10.29	3		XP_011529261.1
768037772	PREDICTED: moesin isoform X3 [Homo sapiens]	6.5371	3	3	3	566	66.6	6.16	10.29	3		XP_011529262.1
768045146	PREDICTED: liver carboxylesterase 1 isoform X2 [Homo sapiens]	34.0541	7	7	7	370	40	6.61	30	7		XP_011545297.1
768047362	PREDICTED: major histocompatibility complex, class I, B isoform X1 [Homo sapiens]	7.7748	2	2	2	373	41.1	5.6	7.01	2		XP_011545539.1
768047364	PREDICTED: major histocompatibility complex, class I, B isoform X2 [Homo sapiens]	8.01105	2	2	2	362	40.3	5.71	7.01	2		XP_011545540.1
768047366	PREDICTED: major histocompatibility complex, class I, B isoform X7 [Homo sapiens]	8.97833	2	2	2	323	36.5	5.47	7.01	2		XP_011545541.1
768052080	PREDICTED: major histocompatibility complex, class I, B isoform X7 [Homo sapiens]	13.3127	3	3	0	323	36.5	5.99	11.7	3		XP_011546344.1
768052562	PREDICTED: HLA class I histocompatibility antigen, A-1 alpha chain isoform X1 [Homo sapiens]	10.4972	2	2	2	362	40.6	6.99	7.59	2		XP_011546426.1
768053214	PREDICTED: major histocompatibility complex, class I, B isoform X7 [Homo sapiens]	12.3839	3	3	3	323	36.4	6.47	10.42	3		XP_011546532.1

## Sheet: U1_PMA_CBD_TNE50
Accession	Description	Coverage	# Peptides	# PSMs	# Unique Peptides	# AAs	MW [kDa]	calc. pI	Score A Sequest HT	# Peptides A Sequest HT		Protein Accession
4501881	actin, alpha skeletal muscle [Homo sapiens]	33.9523	13	24	2	377	42	5.39	65.59	13		NP_001091.1
4501883	actin, aortic smooth muscle [Homo sapiens]	31.0345	12	23	2	377	42	5.39	61.75	12		NP_001604.1
4501885	actin, cytoplasmic 1 [Homo sapiens]	59.2	19	29	8	375	41.7	5.48	90.94	19		NP_001092.1
4501889	actin, gamma-enteric smooth muscle isoform 1 precursor [Homo sapiens]	31.117	12	23	2	376	41.9	5.48	61.75	12		NP_001606.1
4502027	serum albumin preproprotein [Homo sapiens]	3.61248	2	3	2	609	69.3	6.28	8.92	2		NP_000468.1
4502107	annexin A5 [Homo sapiens]	10.9375	3	3	3	320	35.9	5.05	5.19	3		NP_001145.1
4502285	sarcoplasmic/endoplasmic reticulum calcium ATPase 2 isoform a [Homo sapiens]	2.00602	2	2	2	997	109.6	5.36	9.32	2		NP_001672.1
4502303	ATP synthase subunit O, mitochondrial precursor [Homo sapiens]	46.4789	8	10	8	213	23.3	9.96	35.01	8		NP_001688.1
4502673	leukocyte surface antigen CD47 isoform 1 precursor [Homo sapiens]	8.66873	3	3	3	323	35.2	7.21	7.16	3		NP_001768.1
4502981	cytochrome c oxidase subunit 4 isoform 1, mitochondrial precursor [Homo sapiens]	38.4615	5	5	5	169	19.6	9.51	16.19	5		NP_001852.1
4503023	carnitine O-palmitoyltransferase 2, mitochondrial precursor [Homo sapiens]	3.79939	2	2	2	658	73.7	8.18	4.57	2		NP_000089.1
4503117	cystatin-B [Homo sapiens]	24.4898	2	2	2	98	11.1	7.56	7.93	2		NP_000091.1
4503143	cathepsin D preproprotein [Homo sapiens]	15.534	4	4	4	412	44.5	6.54	14.21	4		NP_001900.1
4503475	elongation factor 1-alpha 2 [Homo sapiens]	12.311	5	7	5	463	50.4	9.03	24.14	5		NP_001949.1
4503481	elongation factor 1-gamma [Homo sapiens]	10.7551	4	4	4	437	50.1	6.67	14.17	4		NP_001395.1
4503571	alpha-enolase isoform 1 [Homo sapiens]	11.7512	3	3	3	434	47.1	7.39	12.08	3		NP_001419.1
4503607	electron transfer flavoprotein subunit alpha, mitochondrial isoform a [Homo sapiens]	18.9189	3	3	3	333	35.1	8.38	10.37	3		NP_000117.1
4504041	guanine nucleotide-binding protein G(i) subunit alpha-2 isoform 1 [Homo sapiens]	11.5493	3	3	3	355	40.4	5.54	11.25	3		NP_002061.1
4504151	granulins precursor [Homo sapiens]	5.39629	3	3	3	593	63.5	6.83	8.85	3		NP_002078.1
4504165	gelsolin isoform a precursor [Homo sapiens]	13.0435	6	6	6	782	85.6	6.28	28.34	6		NP_000168.1
4504183	glutathione S-transferase P [Homo sapiens]	21.9048	2	2	2	210	23.3	5.64	8.77	2		NP_000843.1
4504237	semaphorin-7A isoform 1 preproprotein [Homo sapiens]	5.25526	3	3	3	666	74.8	7.64	8.86	3		NP_003603.1
4504245	histone H2A type 1-C [Homo sapiens]	21.5385	2	2	2	130	14.1	11.05	7.05	2		NP_003503.1
4504249	histone H2A type 1 [Homo sapiens]	21.5385	2	2	2	130	14.1	10.9	7.05	2		NP_003505.1
4504259	histone H2B type 1-L [Homo sapiens]	20.6349	2	3	2	126	13.9	10.32	9.85	2		NP_003510.1
4504261	histone H2B type 1-N [Homo sapiens]	20.6349	2	3	2	126	13.9	10.32	9.85	2		NP_003511.1
4504263	histone H2B type 1-M [Homo sapiens]	20.6349	2	3	2	126	14	10.32	9.85	2		NP_003512.1
4504269	histone H2B type 1-H [Homo sapiens]	20.6349	2	3	2	126	13.9	10.32	9.85	2		NP_003515.1
4504277	histone H2B type 2-E [Homo sapiens]	20.6349	2	3	2	126	13.9	10.32	9.85	2		NP_003519.1
4504323	histone H4 [Homo sapiens]	38.835	4	4	4	103	11.4	11.36	11.75	4		NP_003539.1
4504447	heterogeneous nuclear ribonucleoproteins A2/B1 isoform A2 [Homo sapiens]	8.21114	2	2	2	341	36	8.65	6.65	2		NP_002128.1
4504517	heat shock protein beta-1 [Homo sapiens]	13.1707	2	2	2	205	22.8	6.4	6.17	2		NP_001531.1
4504523	10 kDa heat shock protein, mitochondrial [Homo sapiens]	25.4902	2	2	2	102	10.9	8.92	8.94	2		NP_002148.1
4504981	galectin-1 [Homo sapiens]	46.6667	5	7	5	135	14.7	5.5	25.22	5		NP_002296.1
4505061	cation-dependent mannose-6-phosphate receptor isoform 1 precursor [Homo sapiens]	11.5523	2	2	2	277	31	5.83	9.59	2		NP_002346.1
4505303	myosin light chain 6B [Homo sapiens]	11.5385	2	3	2	208	22.8	5.73	11.13	2		NP_002466.1
4505405	transmembrane glycoprotein NMB isoform b precursor [Homo sapiens]	6.07143	2	2	2	560	62.6	6.64	5.44	2		NP_002501.1
4505571	sequestosome-1 isoform 1 [Homo sapiens]	11.1364	3	3	3	440	47.7	5.22	10.15	3		NP_003891.1
4505763	phosphoglycerate kinase 1 [Homo sapiens]	17.2662	5	5	5	417	44.6	8.1	22.42	5		NP_000282.1
4505881	plasminogen isoform 1 precursor [Homo sapiens]	2.46914	3	7	3	810	90.5	7.24	23.07	3		NP_000292.1
4506055	cAMP-dependent protein kinase catalytic subunit alpha isoform Calpha1 [Homo sapiens]	8.83191	2	2	2	351	40.6	8.79	5.87	2		NP_002721.1
4506381	ras-related C3 botulinum toxin substrate 2 [Homo sapiens]	29.1667	6	6	6	192	21.4	7.61	14.5	6		NP_002863.1
4506605	60S ribosomal protein L23 [Homo sapiens]	19.2857	2	2	2	140	14.9	10.51	6.19	2		NP_000969.1
4506607	60S ribosomal protein L18 isoform 1 [Homo sapiens]	18.0851	3	3	3	188	21.6	11.72	11.53	3		NP_000970.1
4506631	60S ribosomal protein L30 [Homo sapiens]	24.3478	2	2	2	115	12.8	9.63	9.01	2		NP_000980.1
4506663	60S ribosomal protein L8 [Homo sapiens]	10.5058	2	2	2	257	28	11.03	5.53	2		NP_000964.1
4506671	60S acidic ribosomal protein P2 [Homo sapiens]	61.7391	7	8	7	115	11.7	4.54	33.02	7		NP_000995.1
4506675	dolichyl-diphosphooligosaccharide--protein glycosyltransferase subunit 1 precursor [Homo sapiens]	21.4168	9	11	9	607	68.5	6.38	33.19	9		NP_002941.1
4506681	40S ribosomal protein S11 [Homo sapiens]	13.9241	2	2	2	158	18.4	10.3	4.97	2		NP_001006.1
4506691	40S ribosomal protein S16 [Homo sapiens]	21.2329	3	3	3	146	16.4	10.21	8.96	3		NP_001011.1
4506695	40S ribosomal protein S19 [Homo sapiens]	19.3103	3	3	3	145	16.1	10.32	9.72	3		NP_001013.1
4506697	40S ribosomal protein S20 isoform 2 [Homo sapiens]	28.5714	4	4	4	119	13.4	9.94	7.81	4		NP_001014.1
4506723	40S ribosomal protein S3a isoform 1 [Homo sapiens]	33.3333	8	8	8	264	29.9	9.73	16.06	8		NP_000997.1
4506725	40S ribosomal protein S4, X isoform X isoform [Homo sapiens]	31.1787	9	10	9	263	29.6	10.15	31.42	9		NP_000998.1
4506727	40S ribosomal protein S4, Y isoform 1 [Homo sapiens]	13.6882	5	5	5	263	29.4	10.24	12.9	5		NP_000999.1
4506741	40S ribosomal protein S7 [Homo sapiens]	10.3093	2	2	2	194	22.1	10.1	5.99	2		NP_001002.1
4506761	protein S100-A10 [Homo sapiens]	14.433	2	3	2	97	11.2	7.37	5.83	2		NP_002957.1
4506765	protein S100-A4 [Homo sapiens]	28.7129	3	5	3	101	11.7	6.11	11.21	3		NP_002952.1
4506787	ras GTPase-activating-like protein IQGAP1 [Homo sapiens]	1.3277	2	2	2	1657	189.1	6.48	7.36	2		NP_003861.1
4507677	endoplasmin precursor [Homo sapiens]	8.96638	5	5	4	803	92.4	4.84	17.06	5		NP_003290.1
4507729	tubulin beta-2A chain [Homo sapiens]	23.5955	9	11	0	445	49.9	4.89	43.63	9		NP_001060.1
4507879	voltage-dependent anion-selective channel protein 1 [Homo sapiens]	61.4841	13	13	13	283	30.8	8.54	55.37	13		NP_003365.1
4507949	14-3-3 protein beta/alpha [Homo sapiens]	9.7561	2	2	1	246	28.1	4.83	6.57	2		NP_003395.1
4557361	BH3-interacting domain death agonist isoform 2 [Homo sapiens]	21.0256	3	3	3	195	22	5.44	11.89	3		NP_001187.1
4757812	ATP synthase subunit f, mitochondrial isoform 2a [Homo sapiens]	25.5319	2	2	2	94	10.9	9.67	7.08	2		NP_004880.1
4757826	beta-2-microglobulin precursor [Homo sapiens]	35.2941	3	6	3	119	13.7	6.52	18.44	3		NP_004039.1
4758040	cytochrome c oxidase subunit 6C proprotein [Homo sapiens]	28	3	3	3	75	8.8	10.39	5.87	3		NP_004365.1
4758774	NADH dehydrogenase [ubiquinone] 1 beta subcomplex subunit 10 [Homo sapiens]	23.2558	3	3	3	172	20.8	8.48	11.5	3		NP_004539.1
4758984	ras-related protein Rab-11A isoform 1 [Homo sapiens]	18.5185	2	2	2	216	24.4	6.57	10.07	2		NP_004654.1
4759098	transformer-2 protein homolog beta isoform 1 [Homo sapiens]	8.68056	2	2	2	288	33.6	11.25	7.74	2		NP_004584.1
4759302	vesicle-associated membrane protein-associated protein B/C isoform 1 [Homo sapiens]	10.6996	2	2	1	243	27.2	7.3	6.55	2		NP_004729.1
4826898	profilin-1 [Homo sapiens]	52.1429	8	9	8	140	15	8.27	29.32	8		NP_005013.1
4885049	actin, alpha cardiac muscle 1 proprotein [Homo sapiens]	33.9523	13	24	2	377	42	5.39	65.59	13		NP_005150.1
4885373	histone H1.1 [Homo sapiens]	6.97674	2	2	2	215	21.8	10.99	3.45	2		NP_005316.1
4885375	histone H1.2 [Homo sapiens]	11.7371	3	3	3	213	21.4	10.93	5.98	3		NP_005310.1
4885377	histone H1.3 [Homo sapiens]	11.3122	3	3	3	221	22.3	11.02	5.98	3		NP_005311.1
4885379	histone H1.4 [Homo sapiens]	11.4155	3	3	3	219	21.9	11.03	5.98	3		NP_005312.1
5031741	dnaJ homolog subfamily A member 2 [Homo sapiens]	5.09709	2	2	2	412	45.7	6.48	4.32	2		NP_005871.1
5031857	L-lactate dehydrogenase A chain isoform 1 [Homo sapiens]	32.8313	10	10	9	332	36.7	8.27	37.19	10		NP_005557.1
5032051	40S ribosomal protein S14 [Homo sapiens]	17.8808	3	3	3	151	16.3	10.05	5.66	3		NP_005608.1
5032057	protein S100-A11 [Homo sapiens]	20	2	2	2	105	11.7	7.12	7.95	2		NP_005611.1
5032137	vesicle-associated membrane protein 7 isoform 1 [Homo sapiens]	15.9091	2	2	2	220	24.9	8.6	7.87	2		NP_005629.1
5174735	tubulin beta-4B chain [Homo sapiens]	35.5056	12	14	10	445	49.8	4.89	56.35	12		NP_006079.1
5453559	ATP synthase subunit d, mitochondrial isoform a [Homo sapiens]	22.3602	3	3	3	161	18.5	5.3	6.79	3		NP_006347.1
5453678	epididymal secretory protein E1 precursor [Homo sapiens]	31.7881	3	3	3	151	16.6	7.65	11.33	3		NP_006423.1
5453704	PRA1 family protein 3 [Homo sapiens]	13.8298	2	2	2	188	21.6	9.77	5.12	2		NP_006398.1
5453990	proteasome activator complex subunit 1 isoform 1 [Homo sapiens]	14.0562	3	3	3	249	28.7	6.02	9.85	3		NP_006254.1
5454152	cytochrome b-c1 complex subunit 7 isoform 1 [Homo sapiens]	15.3153	2	2	2	111	13.5	8.78	5.19	2		NP_006285.1
5729770	tripeptidyl-peptidase 1 preproprotein [Homo sapiens]	6.2167	3	3	3	563	61.2	6.48	6.72	3		NP_000382.3
5729875	membrane-associated progesterone receptor component 1 isoform 1 [Homo sapiens]	27.6923	4	4	4	195	21.7	4.7	14.76	4		NP_006658.1
5803023	vesicular integral-membrane protein VIP36 precursor [Homo sapiens]	10.3933	2	2	2	356	40.2	6.95	10.23	2		NP_006807.1
5803227	14-3-3 protein theta [Homo sapiens]	19.5918	3	3	2	245	27.7	4.78	13.37	3		NP_006817.1
6806890	galectin-9 isoform long [Homo sapiens]	25.3521	6	6	6	355	39.5	9.17	22.71	6		NP_033665.1
6912634	60S ribosomal protein L13a isoform 1 [Homo sapiens]	8.867	2	2	2	203	23.6	10.93	5.37	2		NP_036555.1
7305503	stomatin-like protein 2, mitochondrial isoform a [Homo sapiens]	8.42697	2	2	2	356	38.5	7.39	8.09	2		NP_038470.1
7661948	malectin isoform1 precursor [Homo sapiens]	13.0137	3	3	3	292	32.2	5.41	11.44	3		NP_055545.1
7669492	glyceraldehyde-3-phosphate dehydrogenase isoform 1 [Homo sapiens]	17.0149	4	4	4	335	36	8.46	12.38	4		NP_002037.2
8923390	MICOS complex subunit MIC19 [Homo sapiens]	33.9207	7	10	7	227	26.1	8.28	32.14	7		NP_060282.1
9507215	tubulin alpha-8 chain isoform 1 [Homo sapiens]	16.9265	6	6	1	449	50.1	5.06	21.83	6		NP_061816.1
9624998	heterogeneous nuclear ribonucleoprotein H2 [Homo sapiens]	5.79065	2	2	2	449	49.2	6.3	6.77	2		NP_062543.1
9910382	mitochondrial import receptor subunit TOM22 homolog [Homo sapiens]	26.0563	2	3	2	142	15.5	4.34	14.89	2		NP_064628.1
10800130	histone H2A type 1-D [Homo sapiens]	21.5385	2	2	2	130	14.1	10.9	7.05	2		NP_066409.1
10800140	histone H2B type 1-B [Homo sapiens]	20.6349	2	3	2	126	13.9	10.32	9.85	2		NP_066406.1
10800144	histone cluster 1, H2aj [Homo sapiens]	21.875	2	2	2	128	13.9	10.89	7.05	2		NP_066544.1
10835049	transforming protein RhoA precursor [Homo sapiens]	17.0984	3	3	3	193	21.8	6.1	8.92	3		NP_001655.1
10835220	sarcoplasmic/endoplasmic reticulum calcium ATPase 1 isoform a [Homo sapiens]	2.01207	2	2	2	994	109.2	5.17	9.32	2		NP_004311.1
10863927	peptidyl-prolyl cis-trans isomerase A isoform 1 [Homo sapiens]	39.3939	5	8	5	165	18	7.81	22.77	5		NP_066953.1
10864011	sulfide:quinone oxidoreductase, mitochondrial [Homo sapiens]	29.1111	10	11	10	450	49.9	9.11	44.59	10		NP_067022.1
11055998	guanine nucleotide-binding protein subunit beta-4 [Homo sapiens]	10	3	3	1	340	37.5	6	5.67	3		NP_067642.1
11321601	ATP-dependent 6-phosphofructokinase, platelet type isoform 1 [Homo sapiens]	4.59184	3	3	3	784	85.5	7.55	8.97	3		NP_002618.1
11386147	prosaposin isoform a preproprotein [Homo sapiens]	7.25191	4	5	4	524	58.1	5.17	16	4		NP_002769.1
11415026	60S ribosomal protein L18a [Homo sapiens]	14.7727	3	4	3	176	20.7	10.71	10.2	3		NP_000971.1
11641247	Golgi-associated plant pathogenesis-related protein 1 isoform a [Homo sapiens]	14.9351	2	2	2	154	17.2	9.41	6.97	2		NP_071738.1
11968182	40S ribosomal protein S18 [Homo sapiens]	48.6842	9	9	9	152	17.7	10.99	22.01	9		NP_072045.1
13124875	myosin-11 isoform SM2A [Homo sapiens]	2.06398	4	6	4	1938	223.4	5.53	19.01	4		NP_074035.1
13124879	myosin-11 isoform SM1A [Homo sapiens]	2.0284	4	6	4	1972	227.2	5.5	19.01	4		NP_002465.1
13376181	tubulin alpha chain-like 3 isoform 1 [Homo sapiens]	2.46637	2	2	0	446	49.9	6.05	5.55	2		NP_079079.1
13562114	tubulin beta-1 chain [Homo sapiens]	4.65632	3	3	3	451	50.3	5.17	10.11	3		NP_110400.1
13654237	DNA-dependent protein kinase catalytic subunit isoform 1 [Homo sapiens]	0.678295	2	2	2	4128	468.8	7.12	8.83	2		NP_008835.5
13676857	heat shock-related 70 kDa protein 2 [Homo sapiens]	4.69484	3	3	1	639	70	5.74	7.78	3		NP_068814.2
13775208	ADP/ATP translocase 4 [Homo sapiens]	5.07937	2	2	0	315	35	9.89	4.7	2		NP_112581.1
13904866	60S ribosomal protein L28 isoform 2 [Homo sapiens]	22.6277	2	3	2	137	15.7	12.02	11.65	2		NP_000982.2
13904870	40S ribosomal protein S5 [Homo sapiens]	11.2745	2	2	2	204	22.9	9.72	5.34	2		NP_001000.2
14141152	heterogeneous nuclear ribonucleoprotein M isoform a [Homo sapiens]	7.53425	4	4	4	730	77.5	8.7	10.7	4		NP_005959.2
14389309	tubulin alpha-1C chain isoform c [Homo sapiens]	34.0757	11	13	5	449	49.9	5.1	46.44	11		NP_116093.1
15055539	40S ribosomal protein S2 [Homo sapiens]	6.14334	2	2	2	293	31.3	10.24	1.96	2		NP_002943.2
15431290	60S ribosomal protein L11 isoform 1 [Homo sapiens]	12.3596	2	2	2	178	20.2	9.6	6.98	2		NP_000966.2
15431301	60S ribosomal protein L7 [Homo sapiens]	13.3065	4	4	4	248	29.2	10.65	11.33	4		NP_000962.2
15617199	histone H2A type 3 [Homo sapiens]	21.5385	2	2	2	130	14.1	11.05	7.05	2		NP_254280.1
16306566	histone H2B type 1-O [Homo sapiens]	20.6349	2	3	2	126	13.9	10.32	9.85	2		NP_003518.2
16507237	78 kDa glucose-regulated protein precursor [Homo sapiens]	31.0398	17	18	16	654	72.3	5.16	66.67	17		NP_005338.1
16579885	60S ribosomal protein L4 [Homo sapiens]	18.267	8	8	8	427	47.7	11.06	23.66	8		NP_000959.2
17017988	cytochrome c oxidase subunit 5B, mitochondrial precursor [Homo sapiens]	30.2326	3	4	3	129	13.7	8.81	11.78	3		NP_001853.2
17402900	far upstream element-binding protein 1 isoform 2 [Homo sapiens]	4.81366	2	2	2	644	67.5	7.61	6.7	2		NP_003893.2
17921989	tubulin alpha-4A chain isoform 1 [Homo sapiens]	29.2411	9	10	3	448	49.9	5.06	36.77	9		NP_005991.1
17921993	tubulin alpha-3C/D chain [Homo sapiens]	29.3333	9	11	0	450	49.9	5.1	40.95	9		NP_005992.1
17986001	major histocompatibility complex, class I, B precursor [Homo sapiens]	20.442	5	6	1	362	40.4	5.85	24.91	5		NP_005505.2
17986258	myosin light polypeptide 6 isoform 1 [Homo sapiens]	48.3444	6	9	6	151	16.9	4.65	33.13	6		NP_066299.2
18105045	histone H2A type 1-H [Homo sapiens]	21.875	2	2	2	128	13.9	10.89	7.05	2		NP_542163.1
18105048	histone H2B type 1-K [Homo sapiens]	20.6349	2	3	2	126	13.9	10.32	9.85	2		NP_542160.1
18152783	60S ribosomal protein L10-like [Homo sapiens]	13.0841	3	3	3	214	24.5	10.01	5.33	3		NP_542784.1
18379349	synaptic vesicle membrane protein VAT-1 homolog [Homo sapiens]	8.6514	2	2	2	393	41.9	6.29	9.38	2		NP_006364.2
19557656	histone H2A type 1-B/E [Homo sapiens]	21.5385	2	2	2	130	14.1	11.05	7.05	2		NP_003504.2
19923748	dihydrolipoyllysine-residue succinyltransferase component of 2-oxoglutarate dehydrogenase complex, mitochondrial isoform 1 precursor [Homo sapiens]	8.60927	2	2	2	453	48.7	8.95	6.58	2		NP_001924.2
20070125	protein disulfide-isomerase precursor [Homo sapiens]	15.1575	4	4	4	508	57.1	4.87	13.05	4		NP_000909.2
20070197	dolichyl-diphosphooligosaccharide--protein glycosyltransferase 48 kDa subunit precursor [Homo sapiens]	9.42982	4	4	4	456	50.7	6.4	10.29	4		NP_005207.2
20149498	ferritin light chain [Homo sapiens]	14.2857	2	2	2	175	20	5.78	4.28	2		NP_000137.2
20336752	histone H2B type 1-D [Homo sapiens]	20.6349	2	3	2	126	13.9	10.32	9.85	2		NP_619790.1
20336754	histone H2B type 1-J [Homo sapiens]	20.6349	2	3	2	126	13.9	10.32	9.85	2		NP_066402.2
20357529	guanine nucleotide-binding protein G(I)/G(S)/G(T) subunit beta-2 [Homo sapiens]	10	3	3	1	340	37.3	6	5.67	3		NP_005264.2
20544168	histone H1t [Homo sapiens]	7.24638	2	2	2	207	22	11.71	3.45	2		NP_005314.2
21166389	histone H2B type 1-C/E/F/G/I [Homo sapiens]	20.6349	2	3	2	126	13.9	10.32	9.85	2		NP_003517.2
21361322	tubulin beta-4A chain isoform 3 [Homo sapiens]	29.2793	10	11	8	444	49.6	4.88	44.01	10		NP_006078.2
21361565	ATP synthase F(0) complex subunit B1, mitochondrial precursor [Homo sapiens]	10.9375	3	3	3	256	28.9	9.36	9.93	3		NP_001679.2
21361657	protein disulfide-isomerase A3 precursor [Homo sapiens]	18.4158	8	8	8	505	56.7	6.35	22.91	8		NP_005304.3
21464101	14-3-3 protein gamma [Homo sapiens]	9.7166	2	2	1	247	28.3	4.89	6.57	2		NP_036611.2
21536301	signal transducer and activator of transcription 1-alpha/beta isoform beta [Homo sapiens]	15.5899	9	9	9	712	83	6.42	36.86	9		NP_644671.1
21735621	malate dehydrogenase, mitochondrial isoform 1 precursor [Homo sapiens]	10.355	2	2	2	338	35.5	8.68	9.37	2		NP_005909.2
23308577	D-3-phosphoglycerate dehydrogenase [Homo sapiens]	6.19137	3	3	3	533	56.6	6.71	10.88	3		NP_006614.2
24234686	heat shock cognate 71 kDa protein isoform 2 [Homo sapiens]	27.789	12	14	11	493	53.5	5.86	47.2	12		NP_694881.1
24234688	stress-70 protein, mitochondrial precursor [Homo sapiens]	16.4948	8	8	8	679	73.6	6.16	26.76	8		NP_004125.3
24308201	adipocyte plasma membrane-associated protein [Homo sapiens]	13.7019	3	3	3	416	46.5	6.16	12.68	3		NP_065392.1
24475816	very-long-chain enoyl-CoA reductase [Homo sapiens]	6.81818	2	2	2	308	36	9.45	7.43	2		NP_612510.1
24638446	histone H2A type 2-C [Homo sapiens]	21.7054	2	2	2	129	14	10.9	7.05	2		NP_003508.1
24638454	sarcoplasmic/endoplasmic reticulum calcium ATPase 2 isoform b [Homo sapiens]	1.91939	2	2	2	1042	114.7	5.34	9.32	2		NP_733765.1
24797067	HLA class I histocompatibility antigen, A-1 alpha chain precursor [Homo sapiens]	22.1918	5	6	4	365	40.8	6	25.81	5		NP_002107.3
27436893	tapasin isoform 1 precursor [Homo sapiens]	4.24107	2	2	2	448	47.5	6.99	2.84	2		NP_003181.3
27886529	sarcoplasmic/endoplasmic reticulum calcium ATPase 1 isoform b [Homo sapiens]	1.998	2	2	2	1001	110.2	5.16	9.32	2		NP_775293.1
28173554	histone H2B type 3-B [Homo sapiens]	20.6349	2	3	2	126	13.9	10.32	9.85	2		NP_778225.1
28178832	isocitrate dehydrogenase [NADP], mitochondrial isoform 1 precursor [Homo sapiens]	11.9469	5	6	5	452	50.9	8.69	17.43	5		NP_002159.2
28626504	fermitin family homolog 3 short form [Homo sapiens]	5.58069	3	3	3	663	75.4	6.77	10.38	3		NP_113659.3
28933465	syntaxin-12 [Homo sapiens]	9.42029	2	2	2	276	31.6	5.59	0	2		NP_803173.1
29553970	histone H2A.J [Homo sapiens]	21.7054	2	2	2	129	14	10.9	7.05	2		NP_808760.1
29788768	tubulin beta-2B chain [Homo sapiens]	23.5955	9	11	0	445	49.9	4.89	43.63	9		NP_821080.1
29788785	tubulin beta chain isoform b [Homo sapiens]	39.6396	14	16	0	444	49.6	4.89	63.29	14		NP_821133.1
29789409	mimitin, mitochondrial [Homo sapiens]	30.7692	3	3	3	169	19.8	8.97	8.22	3		NP_777549.1
30410792	proteasome activator complex subunit 2 [Homo sapiens]	10.4603	2	2	2	239	27.4	5.73	5.82	2		NP_002809.2
30581141	proteasome activator complex subunit 1 isoform 2 [Homo sapiens]	9.2	2	2	2	250	28.6	6.71	5.34	2		NP_788955.1
31542319	coatomer subunit epsilon isoform a [Homo sapiens]	11.6883	2	2	2	308	34.5	5.12	6.17	2		NP_009194.2
32171186	B-cell receptor-associated protein 31 isoform b [Homo sapiens]	8.13008	3	3	3	246	28	8.44	9.64	3		NP_005736.3
32189394	ATP synthase subunit beta, mitochondrial precursor [Homo sapiens]	17.3913	5	5	5	529	56.5	5.4	21.88	5		NP_001677.2
32996709	transmembrane emp24 domain-containing protein 7 precursor [Homo sapiens]	28.5714	4	5	4	224	25.2	6.89	16.4	4		NP_861974.1
33286418	pyruvate kinase PKM isoform a [Homo sapiens]	7.72128	3	3	3	531	57.9	7.84	11.17	3		NP_002645.3
33286422	pyruvate kinase PKM isoform b [Homo sapiens]	5.64972	2	2	2	531	58	7.71	8.28	2		NP_872271.1
33350932	cytoplasmic dynein 1 heavy chain 1 [Homo sapiens]	0.516573	2	2	2	4646	532.1	6.4	4.57	2		NP_001367.2
33457308	transmembrane emp24 domain-containing protein 4 isoform 1 precursor [Homo sapiens]	20.2643	3	3	3	227	25.9	8.28	9.12	3		NP_872353.2
34147513	ras-related protein Rab-7a [Homo sapiens]	12.0773	2	3	2	207	23.5	6.7	12.95	2		NP_004628.4
34147630	elongation factor Tu, mitochondrial precursor [Homo sapiens]	10.1099	3	3	3	455	49.8	7.61	10.36	3		NP_003312.3
34419635	heat shock 70 kDa protein 6 [Homo sapiens]	3.11042	2	2	0	643	71	6.14	5.53	2		NP_002146.2
34740329	heterogeneous nuclear ribonucleoprotein A3 [Homo sapiens]	8.46561	2	2	2	378	39.6	9.01	2.38	2		NP_919223.1
37574726	BH3-interacting domain death agonist isoform 1 [Homo sapiens]	17.0124	3	3	3	241	26.8	7.08	11.89	3		NP_932070.1
38016911	erythrocyte band 7 integral membrane protein isoform a [Homo sapiens]	13.5417	3	3	3	288	31.7	7.88	12.56	3		NP_004090.4
38176151	protein lunapark isoform 4 [Homo sapiens]	16.1215	3	3	3	428	47.7	5.11	6.23	3		NP_085153.1
38372919	basigin isoform 1 precursor [Homo sapiens]	7.01299	2	2	2	385	42.2	5.66	8.91	2		NP_001719.2
38372921	basigin isoform 3 [Homo sapiens]	15.3409	2	2	2	176	19.4	6.68	8.91	2		NP_940992.1
38372923	basigin isoform 4 [Homo sapiens]	13.1707	2	2	2	205	22.8	5.47	8.91	2		NP_940993.1
38372925	basigin isoform 2 [Homo sapiens]	10.0372	2	2	2	269	29.2	5.64	8.91	2		NP_940991.1
38683836	leukocyte surface antigen CD47 isoform 2 precursor [Homo sapiens]	9.18033	3	3	3	305	33.2	7.91	7.16	3		NP_942088.1
39725636	transmembrane emp24 domain-containing protein 9 precursor [Homo sapiens]	15.3191	3	4	3	235	27.3	8.02	13.1	3		NP_059980.2
40805827	coatomer subunit epsilon isoform c [Homo sapiens]	14.0625	2	2	2	256	28.8	5.29	6.17	2		NP_955476.1
41399285	60 kDa heat shock protein, mitochondrial [Homo sapiens]	19.1972	9	9	9	573	61	5.87	26.31	9		NP_955472.1
42544185	galectin-8 isoform a [Homo sapiens]	8.6351	3	3	3	359	40.4	9.01	6.69	3		NP_006490.3
42544191	galectin-8 isoform b [Homo sapiens]	9.77918	3	3	3	317	35.8	8.25	6.69	3		NP_963838.1
42558279	tubulin beta-8 chain [Homo sapiens]	17.3423	6	7	6	444	49.7	4.89	26.84	6		NP_817124.1
45007007	2'-5'-oligoadenylate synthase 3 [Homo sapiens]	2.85189	3	3	3	1087	121.1	8.4	8.87	3		NP_006178.2
45439306	aspartate--tRNA ligase, cytoplasmic isoform 1 [Homo sapiens]	8.58283	3	3	3	501	57.1	6.55	8.71	3		NP_001340.2
45827806	atlastin-3 isoform 1 [Homo sapiens]	5.54529	2	2	2	541	60.5	5.66	5.89	2		NP_056274.3
46409270	tubulin alpha-3E chain [Homo sapiens]	24	7	9	0	450	49.9	5.1	33.48	7		NP_997195.1
48255935	CD44 antigen isoform 1 precursor [Homo sapiens]	3.90836	3	3	3	742	81.5	5.33	4.93	3		NP_000601.3
48255937	CD44 antigen isoform 2 precursor [Homo sapiens]	4.14878	3	3	3	699	76.6	5.27	4.93	3		NP_001001389.1
48255939	CD44 antigen isoform 3 precursor [Homo sapiens]	5.88235	3	3	3	493	53.4	5.4	4.93	3		NP_001001390.1
48255941	CD44 antigen isoform 4 precursor [Homo sapiens]	8.03324	3	3	3	361	39.4	5.41	4.93	3		NP_001001391.1
50345982	ATP synthase subunit alpha, mitochondrial isoform c [Homo sapiens]	32.8032	13	13	13	503	54.5	8.24	49.16	13		NP_001001935.1
50345984	ATP synthase subunit alpha, mitochondrial isoform a precursor [Homo sapiens]	29.8373	13	13	13	553	59.7	9.13	49.16	13		NP_001001937.1
50345988	ATP synthase subunit gamma, mitochondrial isoform L (liver) precursor [Homo sapiens]	7.71812	2	2	2	298	33	9.22	6.65	2		NP_001001973.1
50592988	cytochrome b-c1 complex subunit 2, mitochondrial precursor [Homo sapiens]	11.2583	3	3	3	453	48.4	8.63	11.75	3		NP_003357.2
50592996	tubulin beta-3 chain isoform 1 [Homo sapiens]	14.2222	7	8	0	450	50.4	4.93	31.49	7		NP_006077.2
50845388	annexin A2 isoform 1 [Homo sapiens]	17.9272	5	5	5	357	40.4	8.37	15.1	5		NP_001002858.1
51479129	ATP synthase subunit f, mitochondrial isoform 2b [Homo sapiens]	27.2727	2	2	2	88	10.4	9.86	7.08	2		NP_001003713.1
51479132	ATP synthase subunit f, mitochondrial isoform 2c [Homo sapiens]	43.6364	2	2	2	55	6.3	8.88	7.08	2		NP_001003714.1
51479152	ATP synthase subunit d, mitochondrial isoform b [Homo sapiens]	26.2774	3	3	3	137	15.8	7.18	6.79	3		NP_001003785.1
52630342	HLA class I histocompatibility antigen, Cw-1 alpha chain precursor [Homo sapiens]	17.4863	5	6	0	366	40.6	6.04	24.1	5		NP_002108.4
52694752	transmembrane glycoprotein NMB isoform a precursor [Homo sapiens]	5.94406	2	2	2	572	63.9	6.64	5.44	2		NP_001005340.1
54607043	glucosylceramidase isoform 1 precursor [Homo sapiens]	11.5672	4	4	4	536	59.7	7.61	14.54	4		NP_000148.2
55749577	ADP/ATP translocase 1 [Homo sapiens]	5.36913	2	2	0	298	33	9.76	4.7	2		NP_001142.2
55956899	keratin, type I cytoskeletal 9 [Homo sapiens]	14.7673	4	6	4	623	62	5.24	32.65	4		NP_000217.2
56237029	integrin alpha-5 precursor [Homo sapiens]	2.09724	2	2	2	1049	114.5	5.77	7.47	2		NP_002196.2
56549119	dynamin-2 isoform 3 [Homo sapiens]	5.1963	4	4	4	866	97.6	7.64	11.92	4		NP_004936.2
56549121	dynamin-2 isoform 1 [Homo sapiens]	5.17241	4	4	4	870	98	7.44	11.92	4		NP_001005360.1
56549123	dynamin-2 isoform 2 [Homo sapiens]	5.17241	4	4	4	870	97.9	7.46	11.92	4		NP_001005361.1
56549125	dynamin-2 isoform 4 [Homo sapiens]	5.1963	4	4	4	866	97.5	7.65	11.92	4		NP_001005362.1
57013276	tubulin alpha-1B chain [Homo sapiens]	37.694	12	14	0	451	50.1	5.06	53.71	12		NP_006073.2
58761484	T-complex protein 1 subunit gamma isoform c [Homo sapiens]	4.33925	2	2	2	507	56.4	6.49	7.87	2		NP_001008800.1
59853099	dynamin-1 isoform 1 [Homo sapiens]	1.73611	2	2	2	864	97.3	7.17	4.48	2		NP_004399.2
62241042	bifunctional glutamate/proline--tRNA ligase [Homo sapiens]	2.24868	2	2	2	1512	170.5	7.33	5.85	2		NP_004437.2
63055057	beta-actin-like protein 2 [Homo sapiens]	13.5638	6	15	0	376	42	5.59	40.52	6		NP_001017992.1
63162572	T-complex protein 1 subunit gamma isoform a [Homo sapiens]	4.0367	2	2	2	545	60.5	6.49	7.87	2		NP_005989.3
66912162	histone H2B type 2-F isoform a [Homo sapiens]	20.6349	2	3	2	126	13.9	10.32	9.85	2		NP_001019770.1
68160937	E3 ubiquitin/ISG15 ligase TRIM25 [Homo sapiens]	8.57143	4	4	4	630	70.9	8.09	16.86	4		NP_005073.2
68163411	CD166 antigen isoform 1 precursor [Homo sapiens]	13.8937	4	4	4	583	65.1	6.25	19.58	4		NP_001618.2
68508957	liver carboxylesterase 1 isoform c precursor [Homo sapiens]	19.0813	7	7	7	566	62.4	6.6	27.32	7		NP_001257.4
68508965	liver carboxylesterase 1 isoform b precursor [Homo sapiens]	19.0476	7	7	7	567	62.5	6.6	27.32	7		NP_001020365.1
68508967	liver carboxylesterase 1 isoform a precursor [Homo sapiens]	19.0141	7	7	7	568	62.6	6.6	27.32	7		NP_001020366.1
71773329	annexin A6 isoform 1 [Homo sapiens]	5.34918	3	3	3	673	75.8	5.6	10.43	3		NP_001146.2
78000183	60S ribosomal protein L14 [Homo sapiens]	10.6977	2	2	2	215	23.4	10.93	3.57	2		NP_001030168.1
83627705	cytochrome b-c1 complex subunit 6, mitochondrial isoform 1 precursor [Homo sapiens]	29.6703	2	2	2	91	10.7	4.44	7.98	2		NP_005995.2
85794908	ATP synthase subunit f, mitochondrial isoform 2d [Homo sapiens]	48.9796	2	2	2	49	5.7	9.7	7.08	2		NP_001034267.1
88501734	integrin alpha-M isoform 2 precursor [Homo sapiens]	6.85764	7	7	7	1152	127.1	7.23	23.15	7		NP_000623.2
88703062	40S ribosomal protein S4, Y isoform 2 [Homo sapiens]	12.5475	4	5	4	263	29.3	10.08	11.59	4		NP_001034656.1
88999583	myosin light polypeptide 6 isoform 2 [Homo sapiens]	48.3444	6	9	6	151	17	4.55	33.13	6		NP_524147.2
92091583	myosin-11 isoform SM2B [Homo sapiens]	2.05656	4	6	4	1945	224.2	5.53	19.01	4		NP_001035202.1
92091586	myosin-11 isoform SM1B [Homo sapiens]	2.02122	4	6	4	1979	227.9	5.5	19.01	4		NP_001035203.1
94721250	vesicle-associated membrane protein-associated protein A isoform 1 [Homo sapiens]	37.415	7	9	6	294	32.6	8.91	36.25	7		NP_003565.4
94721252	vesicle-associated membrane protein-associated protein A isoform 2 [Homo sapiens]	44.1767	7	9	6	249	27.9	8.62	36.25	7		NP_919415.2
102469694	galectin-9 isoform short [Homo sapiens]	27.8638	6	6	6	323	35.9	8.13	22.71	6		NP_002299.2
106775678	histone H2A type 2-A [Homo sapiens]	21.5385	2	2	2	130	14.1	10.9	7.05	2		NP_001035807.1
109698611	mast cell-expressed membrane protein 1 [Homo sapiens]	14.4385	2	2	2	187	21.2	8.87	7.45	2		NP_777578.2
110224476	prosaposin isoform b preproprotein [Homo sapiens]	7.21063	4	5	4	527	58.4	5.14	16	4		NP_001035930.1
110224479	prosaposin isoform c preproprotein [Homo sapiens]	7.22433	4	5	4	526	58.3	5.14	16	4		NP_001035931.1
111494237	galectin-9B [Homo sapiens]	11.831	3	3	3	355	39.5	9.52	13.16	3		NP_001036150.1
111494239	galectin-9C [Homo sapiens]	11.7978	3	3	3	356	39.6	9.19	13.16	3		NP_001035167.2
111494251	rho-related GTP-binding protein RhoC precursor [Homo sapiens]	10.8808	2	2	2	193	22	6.58	5.26	2		NP_001036144.1
112380628	lysosome-associated membrane glycoprotein 1 precursor [Homo sapiens]	7.67386	3	3	3	417	44.9	8.75	12.05	3		NP_005552.3
115430223	galectin-3 isoform 1 [Homo sapiens]	35.2	7	9	7	250	26.1	8.56	23.96	7		NP_002297.2
116284394	myosin-14 isoform 2 [Homo sapiens]	1.90476	3	4	3	1995	227.7	5.6	12.67	3		NP_079005.3
117190174	heterogeneous nuclear ribonucleoproteins C1/C2 isoform b [Homo sapiens]	7.50853	2	2	2	293	32.3	5.08	3.33	2		NP_004491.2
124494254	proliferation-associated protein 2G4 [Homo sapiens]	9.39086	3	3	3	394	43.8	6.55	8.26	3		NP_006182.2
127139033	NADPH--cytochrome P450 reductase [Homo sapiens]	3.97059	2	2	2	680	77	5.58	5.3	2		NP_000932.3
134133226	POTE ankyrin domain family member E [Homo sapiens]	7.90698	7	9	3	1075	121.3	6.2	28.98	7		NP_001077007.1
148536853	coatomer subunit alpha isoform 2 [Homo sapiens]	11.5196	8	8	8	1224	138.3	7.66	32.23	8		NP_004362.2
148536855	coatomer subunit alpha isoform 1 [Homo sapiens]	11.4355	8	8	8	1233	139.2	7.59	32.23	8		NP_001091868.1
149158698	HLA class I histocompatibility antigen, alpha chain F isoform 2 precursor [Homo sapiens]	8.3815	2	3	1	346	39	5.57	13.47	2		NP_061823.2
149158702	HLA class I histocompatibility antigen, alpha chain F isoform 1 precursor [Homo sapiens]	6.56109	2	3	1	442	50.4	7.17	13.47	2		NP_001091949.1
153791352	POTE ankyrin domain family member F [Homo sapiens]	5.76744	6	8	2	1075	121.4	6.2	22.38	6		NP_001093241.1
153792590	heat shock protein HSP 90-alpha isoform 1 [Homo sapiens]	9.95316	5	6	2	854	98.1	5.16	20.79	5		NP_001017963.2
154146191	heat shock protein HSP 90-alpha isoform 2 [Homo sapiens]	11.612	5	6	2	732	84.6	5.02	20.79	5		NP_005339.3
154354962	MICOS complex subunit MIC60 isoform 2 [Homo sapiens]	28.1374	15	15	15	757	83.5	6.57	45.69	15		NP_001093639.1
154354964	MICOS complex subunit MIC60 isoform 1 [Homo sapiens]	28.1003	15	15	15	758	83.6	6.48	45.69	15		NP_006830.2
154354966	MICOS complex subunit MIC60 isoform 3 [Homo sapiens]	28.5141	15	15	15	747	82.6	6.57	45.69	15		NP_001093640.1
156071459	ADP/ATP translocase 2 [Homo sapiens]	11.745	4	4	1	298	32.8	9.69	7.4	4		NP_001143.2
156071462	ADP/ATP translocase 3 [Homo sapiens]	12.7517	4	4	1	298	32.8	9.74	12.61	4		NP_001627.2
156104878	glutaminase kidney isoform, mitochondrial isoform 1 precursor [Homo sapiens]	4.03587	2	2	2	669	73.4	7.77	6.03	2		NP_055720.3
157412270	heterogeneous nuclear ribonucleoprotein M isoform b [Homo sapiens]	7.95948	4	4	4	691	73.6	8.82	10.7	4		NP_112480.2
166795301	prenylcysteine oxidase 1 precursor [Homo sapiens]	4.9505	2	2	2	505	56.6	6.18	5.56	2		NP_057381.3
167466173	heat shock 70 kDa protein 1A/1B [Homo sapiens]	6.86427	3	3	1	641	70	5.66	10.58	3		NP_005337.2
167466198	intercellular adhesion molecule 1 precursor [Homo sapiens]	16.1654	7	7	7	532	57.8	7.99	25.23	7		NP_000192.2
167614506	plastin-2 [Homo sapiens]	34.2903	15	18	15	627	70.2	5.43	65.7	15		NP_002289.2
170932494	syntaxin-7 [Homo sapiens]	9.57854	2	2	2	261	29.8	5.55	8.78	2		NP_003560.2
189011546	acid ceramidase isoform b [Homo sapiens]	29.6837	7	7	7	411	46.5	7.85	17.48	7		NP_004306.3
189011548	acid ceramidase isoform a preproprotein [Homo sapiens]	30.8861	7	7	7	395	44.6	7.62	17.48	7		NP_808592.2
189011550	acid ceramidase isoform c [Homo sapiens]	21.5938	5	5	5	389	44	7.62	12.41	5		NP_001120977.1
189083776	gelsolin isoform b [Homo sapiens]	13.9535	6	6	6	731	80.6	5.85	28.34	6		NP_001121136.1
189181759	electron transfer flavoprotein subunit alpha, mitochondrial isoform b [Homo sapiens]	22.1831	3	3	3	284	30	8.57	10.37	3		NP_001121188.1
190885499	cytochrome c oxidase subunit 5A, mitochondrial precursor [Homo sapiens]	58	8	12	8	150	16.8	6.79	40.43	8		NP_004246.2
197927201	mitochondrial import receptor subunit TOM6 homolog [Homo sapiens]	41.8919	2	2	2	74	8	4.89	9.94	2		NP_001127965.1
207028494	L-lactate dehydrogenase A chain isoform 2 [Homo sapiens]	25.1825	7	7	6	274	30.2	7.15	25.21	7		NP_001128711.1
209862831	annexin A2 isoform 2 [Homo sapiens]	18.8791	5	5	5	339	38.6	7.75	15.1	5		NP_001129487.1
209915581	60S ribosomal protein L28 isoform 1 [Homo sapiens]	19.0184	2	3	2	163	18.4	10.78	11.65	2		NP_001129606.1
209915584	60S ribosomal protein L28 isoform 3 [Homo sapiens]	18.3432	2	3	2	169	19.1	10.83	11.65	2		NP_001129607.1
209915586	60S ribosomal protein L28 isoform 4 [Homo sapiens]	35.6322	2	3	2	87	10.1	10.67	11.65	2		NP_001129608.1
209915588	60S ribosomal protein L28 isoform 5 [Homo sapiens]	44.9275	2	3	2	69	7.9	10.7	11.65	2		NP_001129609.1
213511508	B-cell receptor-associated protein 31 isoform a [Homo sapiens]	6.38978	3	3	3	313	34.7	7.84	9.64	3		NP_001132929.1
214830451	sequestosome-1 isoform 2 [Homo sapiens]	10.6742	2	2	2	356	38.6	5.47	10.15	2		NP_001135771.1
222144324	myosin regulatory light chain 12B [Homo sapiens]	17.4419	2	2	2	172	19.8	4.84	8.25	2		NP_001138416.1
222352151	poly(rC)-binding protein 1 [Homo sapiens]	9.26966	2	2	2	356	37.5	7.09	7.79	2		NP_006187.2
224831239	integrin alpha-M isoform 1 precursor [Homo sapiens]	6.85169	7	7	7	1153	127.2	7.23	23.15	7		NP_001139280.1
224831241	myosin-14 isoform 3 [Homo sapiens]	1.8664	3	4	3	2036	231.9	5.6	12.67	3		NP_001139281.1
225637520	semaphorin-7A isoform 2 preproprotein [Homo sapiens]	5.3681	3	3	3	652	73.3	7.42	8.86	3		NP_001139501.1
225637524	semaphorin-7A isoform 3 [Homo sapiens]	4.39122	2	2	2	501	57	6.76	5.91	2		NP_001139502.1
226246671	40S ribosomal protein S20 isoform 1 [Homo sapiens]	23.9437	4	4	4	142	16	9.32	7.81	4		NP_001139699.1
228008291	heterogeneous nuclear ribonucleoprotein Q isoform 1 [Homo sapiens]	5.77849	3	3	3	623	69.6	8.59	9.54	3		NP_006363.4
228008295	heterogeneous nuclear ribonucleoprotein Q isoform 4 [Homo sapiens]	6.12245	3	3	3	588	65.6	8.6	9.54	3		NP_001153147.1
228008396	heterogeneous nuclear ribonucleoprotein Q isoform 2 [Homo sapiens]	7.75862	3	3	3	464	52	9.16	9.54	3		NP_001153145.1
228008398	heterogeneous nuclear ribonucleoprotein Q isoform 3 [Homo sapiens]	6.83112	3	3	3	527	58.7	7.56	9.54	3		NP_001153146.1
228008400	heterogeneous nuclear ribonucleoprotein Q isoform 6 [Homo sapiens]	6.40569	3	3	3	562	62.6	7.56	9.54	3		NP_001153149.1
238624110	histone H2B type 2-F isoform b [Homo sapiens]	19.403	2	3	2	134	14.8	10.35	9.85	2		NP_001154806.1
256985100	TRAM adaptor with GOLD domain isoform 1 precursor [Homo sapiens]	15.8416	4	5	4	404	46.1	5.12	16.4	4		NP_001157940.1
256985102	TRAM adaptor with GOLD domain isoform 2 precursor [Homo sapiens]	34.0426	4	5	4	188	21.2	6.2	16.4	4		NP_001157941.1
260099723	L-lactate dehydrogenase A chain isoform 3 [Homo sapiens]	30.1939	10	10	9	361	39.8	8.43	37.19	10		NP_001158886.1
260099725	L-lactate dehydrogenase A chain isoform 4 [Homo sapiens]	18.9781	4	4	3	274	30	8	15.71	4		NP_001158887.1
260099727	L-lactate dehydrogenase A chain isoform 5 [Homo sapiens]	21.5768	4	4	3	241	26.7	8.15	15.71	4		NP_001158888.1
261878575	guanine nucleotide-binding protein G(i) subunit alpha-2 isoform 2 [Homo sapiens]	12.8931	3	3	3	318	36.4	5.59	11.25	3		NP_001159897.1
262527242	tapasin isoform 2 precursor [Homo sapiens]	3.76984	2	2	2	504	53.9	7.08	2.84	2		NP_757345.2
284807150	glucosylceramidase isoform 2 [Homo sapiens]	13.8085	4	4	4	449	50.3	7.15	14.54	4		NP_001165282.1
284807152	glucosylceramidase isoform 3 precursor [Homo sapiens]	7.18686	3	3	3	487	54.4	7.61	9.26	3		NP_001165283.1
285395246	tubulin alpha chain-like 3 isoform 2 [Homo sapiens]	2.70936	2	2	0	406	45.5	6.32	5.55	2		NP_001165335.1
288915539	plastin-3 isoform 2 [Homo sapiens]	3.48259	2	2	2	603	67.6	5.66	3.9	2		NP_001165806.1
291575128	L-lactate dehydrogenase B chain [Homo sapiens]	24.5509	7	7	6	334	36.6	6.05	18	7		NP_001167568.1
294345475	galectin-3 isoform 2 [Homo sapiens]	16.5	3	4	3	200	20.5	8.57	7.36	3		NP_001170859.1
296317337	voltage-dependent anion-selective channel protein 2 isoform 1 [Homo sapiens]	20.712	5	6	5	309	33.4	7.59	14.94	5		NP_001171712.1
297747292	vesicle-associated membrane protein 7 isoform 3 [Homo sapiens]	13.4615	2	2	2	260	30.2	8.37	7.87	2		NP_001172112.1
299758394	dynamin-2 isoform 5 [Homo sapiens]	5.17837	4	4	4	869	97.9	7.44	11.92	4		NP_001177645.1
301171345	tubulin alpha-8 chain isoform 2 [Homo sapiens]	19.8433	6	6	1	383	42.9	5.08	21.83	6		NP_001180343.1
302129652	annexin A6 isoform 2 [Homo sapiens]	5.61622	3	3	3	641	72.4	5.6	10.43	3		NP_001180473.1
307574674	vesicle-associated membrane protein-associated protein B/C isoform 2 [Homo sapiens]	26.2626	2	2	1	99	11.1	8.54	6.55	2		NP_001182606.1
308235963	tubulin beta-3 chain isoform 2 [Homo sapiens]	7.93651	4	5	4	378	42.4	4.96	15.86	4		NP_001184110.1
311893396	ATP5J2-PTCD1 fusion protein [Homo sapiens]	3.20427	2	2	2	749	84.1	8.72	7.08	2		NP_001185808.1
315221152	60S ribosomal protein L11 isoform 2 [Homo sapiens]	12.4294	2	2	2	177	20.1	9.6	6.98	2		NP_001186731.1
315570273	actin, gamma-enteric smooth muscle isoform 2 precursor [Homo sapiens]	21.6216	8	11	0	333	37.1	5.54	23.2	8		NP_001186822.1
316659409	actin, cytoplasmic 2 [Homo sapiens]	59.2	19	29	8	375	41.8	5.48	90.94	19		NP_001186883.1
316983136	cytochrome b-c1 complex subunit 7 isoform 2 [Homo sapiens]	21.519	2	2	2	79	10	5.63	5.19	2		NP_001186904.1
319996655	c-myc promoter-binding protein-1 isoform MBP-1 [Homo sapiens]	14.956	3	3	3	341	36.9	6.28	12.08	3		NP_001188412.1
321400138	CD44 antigen isoform 6 precursor [Homo sapiens]	6.75991	3	3	3	429	46.5	5.74	4.93	3		NP_001189484.1
321400140	CD44 antigen isoform 7 precursor [Homo sapiens]	8.52941	3	3	3	340	37.3	5.52	4.93	3		NP_001189485.1
321400142	CD44 antigen isoform 8 precursor [Homo sapiens]	7.14286	2	2	2	294	32.1	5.21	2.48	2		NP_001189486.1
332164775	pyruvate kinase PKM isoform c [Homo sapiens]	4.95868	2	2	2	605	65.9	7.87	8.28	2		NP_001193725.1
332164777	pyruvate kinase PKM isoform d [Homo sapiens]	8.97155	3	3	3	457	49.9	7.83	11.17	3		NP_001193726.1
332164779	pyruvate kinase PKM isoform e [Homo sapiens]	5.42636	2	2	2	516	56.2	8.44	6.68	2		NP_001193727.1
332164781	pyruvate kinase PKM isoform f [Homo sapiens]	5.59701	2	2	2	536	58.5	7.71	8.28	2		NP_001193728.1
334191701	ATP-dependent 6-phosphofructokinase, platelet type isoform 2 [Homo sapiens]	4.63918	3	3	3	776	85.3	8.59	8.97	3		NP_001229268.1
337752170	HLA class I histocompatibility antigen, A-1 alpha chain precursor [Homo sapiens]	18.9041	4	5	3	365	40.8	6.54	22.59	4		NP_001229687.1
339882741	HLA class I histocompatibility antigen, Cw-1 alpha chain precursor [Homo sapiens]	17.4863	5	6	0	366	40.7	5.87	24.1	5		NP_001229971.1
343168770	CD166 antigen isoform 2 precursor [Homo sapiens]	14.2105	4	4	4	570	63.6	7.3	19.58	4		NP_001230209.1
343168772	CD166 antigen isoform 3 precursor [Homo sapiens]	14.5946	4	4	4	555	61.9	6.19	19.58	4		NP_001230210.1
347300416	BH3-interacting domain death agonist isoform 3 [Homo sapiens]	30.303	2	2	2	99	11.3	9.69	8.45	2		NP_001231498.1
359338991	heterogeneous nuclear ribonucleoprotein Q isoform 7 [Homo sapiens]	5.85366	2	2	2	410	46.3	8.88	6.42	2		NP_001240700.1
363498929	cytochrome b-c1 complex subunit 7 isoform 3 [Homo sapiens]	12.1429	2	2	2	140	16.3	8.97	5.19	2		NP_001241681.1
367460087	myosin-10 isoform 2 [Homo sapiens]	5.26316	9	12	9	1976	228.9	5.54	38.65	9		NP_005955.3
367460090	myosin-10 isoform 3 [Homo sapiens]	5.23929	9	12	9	1985	229.9	5.57	38.65	9		NP_001243024.1
373251164	glutaminase kidney isoform, mitochondrial isoform 2 [Homo sapiens]	4.51505	2	2	2	598	65.4	7.88	6.03	2		NP_001243239.1
378404908	glyceraldehyde-3-phosphate dehydrogenase isoform 2 [Homo sapiens]	19.4539	4	4	4	293	31.5	7.61	12.38	4		NP_001243728.1
378548190	40S ribosomal protein S3 isoform 1 [Homo sapiens]	13.9918	3	4	3	243	26.7	9.66	12.87	3		NP_001243731.1
380837121	vesicle-trafficking protein SEC22b precursor [Homo sapiens]	20	3	3	3	215	24.7	8.51	13.27	3		NP_004883.3
381342476	heterogeneous nuclear ribonucleoprotein H [Homo sapiens]	5.79065	2	2	2	449	49.2	6.3	6.77	2		NP_001244222.1
382546007	ATP synthase subunit alpha, mitochondrial isoform b precursor [Homo sapiens]	25.8004	11	11	11	531	57.5	9.29	41.12	11		NP_001244263.1
384475528	gelsolin isoform d [Homo sapiens]	13.6364	6	6	6	748	82.5	5.63	28.34	6		NP_001244958.1
386869503	40S ribosomal protein S3 isoform 2 [Homo sapiens]	13.1274	3	4	3	259	28.5	9.73	12.87	3		NP_001247435.1
390517030	gelsolin isoform f [Homo sapiens]	13.2986	6	6	6	767	84.7	5.83	28.34	6		NP_001121135.2
392494079	lipoamide acyltransferase component of branched-chain alpha-keto acid dehydrogenase complex, mitochondrial precursor [Homo sapiens]	4.14938	2	2	2	482	53.5	8.51	6.68	2		NP_001909.3
393715091	tubulin alpha-1A chain isoform 1 [Homo sapiens]	34.5898	11	13	0	451	50.1	5.06	49.37	11		NP_001257328.1
393715095	tubulin alpha-1A chain isoform 2 [Homo sapiens]	37.5	11	13	0	416	46.3	5.08	49.37	11		NP_001257329.1
395132436	60S ribosomal protein L18 isoform 2 [Homo sapiens]	21.3836	3	3	3	159	18.1	11.84	11.53	3		NP_001257419.1
395132450	60S ribosomal protein L13a isoform 2 [Homo sapiens]	12.6761	2	2	2	142	16.7	10.81	5.37	2		NP_001257420.1
396578176	erythrocyte band 7 integral membrane protein isoform c [Homo sapiens]	13.7056	2	2	2	197	22	7.85	8.7	2		NP_001257455.1
396578178	erythrocyte band 7 integral membrane protein isoform d [Homo sapiens]	16.0714	2	2	2	168	18.7	9.39	8.7	2		NP_001257456.1
427918083	gelsolin isoform e [Homo sapiens]	13.8024	6	6	6	739	81.4	5.85	28.34	6		NP_001244959.1
431822401	heat shock protein HSP 90-beta isoform a [Homo sapiens]	19.7514	10	11	6	724	83.2	5.03	36.96	10		NP_001258898.1
431822406	heat shock protein HSP 90-beta isoform b [Homo sapiens]	19.6746	9	10	5	676	78.2	5.05	34.18	9		NP_001258900.1
431822408	heat shock protein HSP 90-beta isoform c [Homo sapiens]	20.028	10	11	6	714	82.3	5.06	36.96	10		NP_001258901.1
459352730	POTE ankyrin domain family member J [Homo sapiens]	3.37187	4	4	2	1038	117.3	5.97	10.76	4		NP_001264012.1
475808427	POTE ankyrin domain family member I [Homo sapiens]	4.27907	5	6	2	1075	121.2	6.21	13.67	5		NP_001264335.1
527498279	prohibitin isoform 1 [Homo sapiens]	6.98529	2	2	2	272	29.8	5.76	3.93	2		NP_001268425.1
527498282	prohibitin isoform 2 [Homo sapiens]	12.2581	2	2	2	155	17	8.79	3.93	2		NP_001268426.1
528078353	proteasome activator complex subunit 1 isoform 3 [Homo sapiens]	9.87124	2	2	2	233	26.9	5.78	5.34	2		NP_001268457.1
528078355	proteasome activator complex subunit 1 isoform 4 [Homo sapiens]	10.1695	2	2	2	236	27.2	5.83	7.8	2		NP_001268458.1
528281411	trifunctional enzyme subunit beta, mitochondrial isoform 2 precursor [Homo sapiens]	3.7037	2	2	2	459	49.6	9.42	2.74	2		NP_001268441.1
530361831	PREDICTED: carnitine O-palmitoyltransferase 2, mitochondrial isoform X1 [Homo sapiens]	3.93701	2	2	2	635	71.1	8.35	4.57	2		XP_005270541.1
530367168	PREDICTED: MICOS complex subunit MIC60 isoform X1 [Homo sapiens]	28.5523	15	15	15	746	82.4	6.65	45.69	15		XP_005264167.1
530367174	PREDICTED: MICOS complex subunit MIC60 isoform X2 [Homo sapiens]	25.6198	13	13	13	726	80	6.74	40.74	13		XP_005264170.1
530367176	PREDICTED: MICOS complex subunit MIC60 isoform X3 [Homo sapiens]	26.014	13	13	13	715	78.9	6.86	40.74	13		XP_005264171.1
530369992	PREDICTED: heterogeneous nuclear ribonucleoprotein A3 isoform X2 [Homo sapiens]	8.98876	2	2	2	356	37	8.31	2.38	2		XP_005246438.1
530370171	PREDICTED: glutaminase kidney isoform, mitochondrial isoform X2 [Homo sapiens]	4.83005	2	2	2	559	61	8.32	6.03	2		XP_005246524.1
530370916	PREDICTED: tubulin alpha-4A chain isoform X1 [Homo sapiens]	30.254	9	10	3	433	48.3	5.01	36.77	9		XP_005246889.1
530371010	PREDICTED: protein lunapark isoform X2 [Homo sapiens]	18.1102	3	3	3	381	42.6	9.26	6.23	3		XP_005246935.1
530371014	PREDICTED: protein lunapark isoform X4 [Homo sapiens]	22.2581	3	3	3	310	33.6	4.75	6.23	3		XP_005246937.1
530375554	PREDICTED: leukocyte surface antigen CD47 isoform X1 [Homo sapiens]	8.97436	3	3	3	312	34	7.21	7.16	3		XP_005247965.1
530375558	PREDICTED: leukocyte surface antigen CD47 isoform X2 [Homo sapiens]	9.55631	3	3	3	293	31.9	6.74	7.16	3		XP_005247966.1
530376503	PREDICTED: 60S ribosomal protein L9 isoform X1 [Homo sapiens]	15.625	2	2	2	192	21.9	9.95	6.5	2		XP_005262718.1
530380520	PREDICTED: annexin A6 isoform X1 [Homo sapiens]	5.3973	3	3	3	667	75.2	5.67	10.43	3		XP_005268489.1
530381854	PREDICTED: histone H2B type 1-D isoform X1 [Homo sapiens]	17.3333	2	3	2	150	16.3	10.32	9.85	2		XP_005249096.1
530381888	PREDICTED: HLA class I histocompatibility antigen, alpha chain F isoform X1 [Homo sapiens]	8.23864	2	3	1	352	39.7	5.67	13.47	2		XP_005249111.1
530381921	PREDICTED: heat shock 70 kDa protein 1-like isoform X2 [Homo sapiens]	6.24113	3	3	1	705	77.5	7.66	10.58	3		XP_005249127.1
530381923	PREDICTED: heat shock 70 kDa protein 1-like isoform X1 [Homo sapiens]	6.86427	3	3	1	641	70.3	6.02	10.58	3		XP_005249128.1
530382968	PREDICTED: heterogeneous nuclear ribonucleoprotein Q isoform X2 [Homo sapiens]	6.41711	3	3	3	561	62.5	7.56	9.54	3		XP_005248692.1
530382970	PREDICTED: heterogeneous nuclear ribonucleoprotein Q isoform X3 [Homo sapiens]	6.85714	3	3	3	525	59	9.36	9.54	3		XP_005248693.1
530384404	PREDICTED: transmembrane glycoprotein NMB isoform X1 [Homo sapiens]	6.40301	2	2	2	531	59.3	6.13	5.44	2		XP_005249635.1
530384720	PREDICTED: heterogeneous nuclear ribonucleoproteins A2/B1 isoform X1 [Homo sapiens]	7.93201	2	2	2	353	37.4	8.95	6.65	2		XP_005249786.1
530387776	PREDICTED: acid ceramidase isoform X1 [Homo sapiens]	32.7078	7	7	7	373	42.6	6.9	17.48	7		XP_005273561.1
530390646	PREDICTED: dynamin-1 isoform X4 [Homo sapiens]	1.72811	2	2	2	868	97.6	7.34	4.48	2		XP_005251820.1
530390648	PREDICTED: dynamin-1 isoform X5 [Homo sapiens]	1.7301	2	2	2	867	97.4	7.01	4.48	2		XP_005251821.1
530390658	PREDICTED: dynamin-1 isoform X1 [Homo sapiens]	1.76263	2	2	2	851	96	7.01	4.48	2		XP_005251826.1
530391018	PREDICTED: gelsolin isoform X6 [Homo sapiens]	13.5638	6	6	6	752	82.8	5.85	28.34	6		XP_005251997.1
530392189	PREDICTED: ATP-dependent 6-phosphofructokinase, platelet type isoform X1 [Homo sapiens]	4.31138	3	3	3	835	90.8	7.11	8.97	3		XP_005252522.1
530392191	PREDICTED: ATP-dependent 6-phosphofructokinase, platelet type isoform X3 [Homo sapiens]	4.59184	3	3	3	784	85.4	7.78	8.97	3		XP_005252523.1
530392193	PREDICTED: ATP-dependent 6-phosphofructokinase, platelet type isoform X4 [Homo sapiens]	4.82574	3	3	3	746	81.7	7.55	8.97	3		XP_005252524.1
530396004	PREDICTED: CD44 antigen isoform X1 [Homo sapiens]	3.9031	3	3	3	743	81.6	5.33	4.93	3		XP_005253288.1
530396006	PREDICTED: CD44 antigen isoform X2 [Homo sapiens]	3.90836	3	3	3	742	81.5	5.33	4.93	3		XP_005253289.1
530396008	PREDICTED: CD44 antigen isoform X4 [Homo sapiens]	4.12518	3	3	3	703	77	5.39	4.93	3		XP_005253290.1
530396010	PREDICTED: CD44 antigen isoform X5 [Homo sapiens]	4.13105	3	3	3	702	77	5.39	4.93	3		XP_005253291.1
530396012	PREDICTED: CD44 antigen isoform X6 [Homo sapiens]	4.14286	3	3	3	700	76.6	5.27	4.93	3		XP_005253292.1
530396018	PREDICTED: CD44 antigen isoform X11 [Homo sapiens]	5	3	3	3	580	63.1	5.71	4.93	3		XP_005253295.1
530396020	PREDICTED: CD44 antigen isoform X12 [Homo sapiens]	5.0173	3	3	3	578	62.9	5.08	4.93	3		XP_005253296.1
530396022	PREDICTED: CD44 antigen isoform X14 [Homo sapiens]	5.42056	3	3	3	535	58	5.02	4.93	3		XP_005253297.1
530401316	PREDICTED: 2'-5'-oligoadenylate synthase 3 isoform X1 [Homo sapiens]	2.84665	3	3	3	1089	121.4	8.44	8.87	3		XP_005253946.1
530405975	PREDICTED: pyruvate kinase PKM isoform X3 [Homo sapiens]	6.93739	3	3	3	591	64.5	8.02	11.17	3		XP_005254500.1
530406197	PREDICTED: beta-2-microglobulin isoform X1 [Homo sapiens]	34.4262	3	6	3	122	14	7.44	18.44	3		XP_005254606.1
530410341	PREDICTED: myosin-10 isoform X1 [Homo sapiens]	5.18186	9	12	9	2007	232.4	5.55	38.65	9		XP_005256708.1
530410584	PREDICTED: galectin-9C isoform X1 [Homo sapiens]	11.831	3	3	3	355	39.5	9.19	13.16	3		XP_005256826.1
530410586	PREDICTED: galectin-9C isoform X3 [Homo sapiens]	13.0031	3	3	3	323	35.9	8.38	13.16	3		XP_005256827.1
530416988	PREDICTED: 60S ribosomal protein L28 isoform X1 [Homo sapiens]	18.2353	2	3	2	170	19.1	11.46	11.65	2		XP_005259189.1
530423536	PREDICTED: liver carboxylesterase 1 isoform X1 [Homo sapiens]	19.0476	7	7	7	567	62.4	6.6	27.32	7		XP_005255831.1
530425819	PREDICTED: adipocyte plasma membrane-associated protein isoform X1 [Homo sapiens]	19.7232	3	3	3	289	32.1	5.85	12.68	3		XP_005260820.1
530427501	PREDICTED: heterogeneous nuclear ribonucleoprotein M isoform X1 [Homo sapiens]	7.69231	4	4	4	715	76	8.7	10.7	4		XP_005272535.1
530427503	PREDICTED: heterogeneous nuclear ribonucleoprotein M isoform X2 [Homo sapiens]	5.61798	3	3	3	712	75.6	8.57	7.23	3		XP_005272536.1
530427505	PREDICTED: heterogeneous nuclear ribonucleoprotein M isoform X3 [Homo sapiens]	8.13609	4	4	4	676	72.1	8.82	10.7	4		XP_005272537.1
530427507	PREDICTED: heterogeneous nuclear ribonucleoprotein M isoform X4 [Homo sapiens]	9.01639	4	4	4	610	64.4	8.76	10.7	4		XP_005272538.1
530427511	PREDICTED: heterogeneous nuclear ribonucleoprotein M isoform X5 [Homo sapiens]	9.63222	4	4	4	571	60.5	8.92	10.7	4		XP_005272540.1
530427783	PREDICTED: heat shock 70 kDa protein 1-like isoform X2 [Homo sapiens]	6.24113	3	3	1	705	77.5	8.06	10.58	3		XP_005274916.1
530428008	PREDICTED: heat shock 70 kDa protein 1-like isoform X1 [Homo sapiens]	6.86427	3	3	1	641	70.4	6.02	10.58	3		XP_005272873.1
530428630	PREDICTED: major histocompatibility complex, class I, B isoform X3 [Homo sapiens]	18.2716	5	6	0	405	44.6	6.21	24.43	5		XP_005275157.1
530428661	PREDICTED: HLA class I histocompatibility antigen, alpha chain F isoform X1 [Homo sapiens]	8.23864	2	3	1	352	39.7	5.67	13.47	2		XP_005275172.1
530429121	PREDICTED: HLA class I histocompatibility antigen, A-1 alpha chain isoform X2 [Homo sapiens]	9.71867	3	3	0	391	44	6.64	11.78	3		XP_005275388.1
530429558	PREDICTED: major histocompatibility complex, class I, B isoform X6 [Homo sapiens]	18.2716	5	6	0	405	44.6	6.05	24.43	5		XP_005275592.1
530430976	PREDICTED: liver carboxylesterase 1 isoform X1 [Homo sapiens]	19.0476	7	7	7	567	62.3	6.48	27.32	7		XP_005276924.1
537544624	plastin-3 isoform 3 [Homo sapiens]	3.40357	2	2	2	617	69.3	5.83	3.9	2		NP_001269266.1
537544626	plastin-3 isoform 4 [Homo sapiens]	3.58974	2	2	2	585	65.6	6.3	3.9	2		NP_001269267.1
538919685	malate dehydrogenase, mitochondrial isoform 2 precursor [Homo sapiens]	11.8243	2	2	2	296	30.9	8.43	9.37	2		NP_001269332.1
543173167	guanine nucleotide-binding protein G(I)/G(S)/G(T) subunit beta-1 isoform 2 [Homo sapiens]	23.3333	4	4	3	240	25.9	4.89	8.75	4		NP_001269467.1
543173169	guanine nucleotide-binding protein G(I)/G(S)/G(T) subunit beta-1 isoform 1 [Homo sapiens]	19.7059	5	5	3	340	37.4	6	11.97	5		NP_001269468.1
543583773	guanine nucleotide-binding protein G(i) subunit alpha-2 isoform 3 [Homo sapiens]	13.5314	3	3	3	303	34.9	5.38	11.25	3		NP_001269546.1
543583775	guanine nucleotide-binding protein G(i) subunit alpha-2 isoform 4 [Homo sapiens]	10.219	2	2	2	274	31.5	5.44	6.8	2		NP_001269547.1
543583777	guanine nucleotide-binding protein G(i) subunit alpha-2 isoform 5 [Homo sapiens]	12.0944	3	3	3	339	38.4	5.48	11.25	3		NP_001269548.1
543583779	guanine nucleotide-binding protein G(i) subunit alpha-2 isoform 6 [Homo sapiens]	12.0944	3	3	3	339	38.7	5.86	11.25	3		NP_001269549.1
544063461	membrane-associated progesterone receptor component 1 isoform 2 [Homo sapiens]	27.972	3	3	3	143	15.9	5.03	11.33	3		NP_001269550.1
554506571	sarcoplasmic/endoplasmic reticulum calcium ATPase 1 isoform c [Homo sapiens]	2.3015	2	2	2	869	95.1	5.77	9.32	2		NP_001273004.1
555943922	heme oxygenase 2 isoform b [Homo sapiens]	9.81013	2	2	2	316	36	5.41	8.97	2		NP_001273198.1
555943926	heme oxygenase 2 isoform c [Homo sapiens]	10.8014	2	2	2	287	32.8	5.91	8.97	2		NP_001273200.1
558757329	Golgi-associated plant pathogenesis-related protein 1 isoform b [Homo sapiens]	17.9688	2	2	2	128	14.2	9.51	6.97	2		NP_001273939.1
558757349	Golgi-associated plant pathogenesis-related protein 1 isoform e [Homo sapiens]	13.6095	2	2	2	169	18.9	9.61	6.97	2		NP_001273942.1
570359599	dynamin-1 isoform 3 [Homo sapiens]	1.76263	2	2	2	851	95.8	6.76	4.48	2		NP_001275667.1
570359601	dynamin-1 isoform 4 [Homo sapiens]	1.73611	2	2	2	864	97.2	6.87	4.48	2		NP_001275668.1
574584803	tubulin beta-4A chain isoform 1 [Homo sapiens]	25.8586	9	10	8	495	54.4	5.02	38.4	9		NP_001276052.1
574584811	tubulin beta-4A chain isoform 2 [Homo sapiens]	26.1759	9	10	8	489	53.8	4.98	38.4	9		NP_001276056.1
574584818	tubulin beta-4A chain isoform 4 [Homo sapiens]	25.8065	7	8	7	372	41.6	4.94	29.29	7		NP_001276059.1
578798587	PREDICTED: alpha-enolase isoform X1 [Homo sapiens]	11.7512	3	3	3	434	47.3	6.99	12.08	3		XP_006710496.1
578800966	PREDICTED: histone H2B type 2-F isoform X1 [Homo sapiens]	17.6871	2	3	2	147	16.1	9.96	9.85	2		XP_006711398.1
578800968	PREDICTED: histone H2B type 2-F isoform X2 [Homo sapiens]	20.3125	2	3	2	128	14.2	10.29	9.85	2		XP_006711399.1
578803915	PREDICTED: heterogeneous nuclear ribonucleoprotein A3 isoform X3 [Homo sapiens]	9.66767	2	2	2	331	35.4	9.17	2.38	2		XP_006712428.1
578804102	PREDICTED: glutaminase kidney isoform, mitochondrial isoform X1 [Homo sapiens]	4.08472	2	2	2	661	72.4	8.57	6.03	2		XP_006712498.1
578804821	PREDICTED: signal transducer and activator of transcription 1-alpha/beta isoform X1 [Homo sapiens]	14.8	9	9	9	750	87.3	6.05	36.86	9		XP_006712781.1
578807655	PREDICTED: transformer-2 protein homolog beta isoform X1 [Homo sapiens]	13.2979	2	2	2	188	21.9	10.15	7.74	2		XP_006713787.1
578811108	PREDICTED: heterogeneous nuclear ribonucleoprotein H isoform X3 [Homo sapiens]	5.75221	2	2	2	452	49.1	6.92	6.77	2		XP_006714925.1
578811110	PREDICTED: heterogeneous nuclear ribonucleoprotein H isoform X4 [Homo sapiens]	6.06061	2	2	2	429	47.1	6.34	6.77	2		XP_006714926.1
578813467	PREDICTED: heterogeneous nuclear ribonucleoproteins A2/B1 isoform X2 [Homo sapiens]	8.94569	2	2	2	313	33.9	9.03	6.65	2		XP_006715777.1
578813594	PREDICTED: actin, cytoplasmic 1 isoform X1 [Homo sapiens]	47.4308	12	14	6	253	28.2	5.34	41.49	12		XP_006715827.1
578815687	PREDICTED: 60S ribosomal protein L7 isoform X1 [Homo sapiens]	15.8654	4	4	4	208	24.4	10.67	11.33	4		XP_006716526.1
578817145	PREDICTED: dynamin-1 isoform X3 [Homo sapiens]	1.72811	2	2	2	868	97.5	7.01	4.48	2		XP_006717055.1
578817148	PREDICTED: dynamin-1 isoform X10 [Homo sapiens]	3.01205	2	2	2	498	56.5	6.83	4.48	2		XP_006717056.1
578818414	PREDICTED: ATP-dependent 6-phosphofructokinase, platelet type isoform X2 [Homo sapiens]	4.51694	3	3	3	797	87	7.08	8.97	3		XP_006717512.1
578818565	PREDICTED: vimentin isoform X1 [Homo sapiens]	4.93562	2	2	2	466	53.6	5.12	5.12	2		XP_006717563.1
578819752	PREDICTED: voltage-dependent anion-selective channel protein 2 isoform X1 [Homo sapiens]	21.7687	5	6	5	294	31.5	7.56	14.94	5		XP_006718024.1
578820966	PREDICTED: CD44 antigen isoform X3 [Homo sapiens]	3.91363	3	3	3	741	81.4	5.33	4.93	3		XP_006718451.1
578820976	PREDICTED: CD44 antigen isoform X18 [Homo sapiens]	5.28967	2	2	2	397	44.4	5.36	2.48	2		XP_006718453.1
578821273	PREDICTED: atlastin-3 isoform X1 [Homo sapiens]	5.74713	2	2	2	522	58.2	5.73	5.89	2		XP_006718556.1
578822859	PREDICTED: L-lactate dehydrogenase B chain isoform X1 [Homo sapiens]	17.5637	5	5	4	353	39.4	8.9	11.33	5		XP_006719137.1
578824099	PREDICTED: 60S ribosomal protein L6 isoform X1 [Homo sapiens]	10.7639	3	3	3	288	32.7	10.58	8.47	3		XP_006719611.1
578825987	PREDICTED: proteasome activator complex subunit 2 isoform X1 [Homo sapiens]	15.4321	2	2	2	162	18.5	6.7	5.82	2		XP_006720276.1
578827087	PREDICTED: pyruvate kinase PKM isoform X2 [Homo sapiens]	6.77686	3	3	3	605	65.8	7.99	11.17	3		XP_006720633.1
578830909	PREDICTED: galectin-9 isoform X1 [Homo sapiens]	28.9389	6	6	6	311	34.7	8.13	22.71	6		XP_006721955.1
578830911	PREDICTED: galectin-9 isoform X2 [Homo sapiens]	20.1439	4	4	4	278	30.4	9.55	16.41	4		XP_006721956.1
578830913	PREDICTED: galectin-9 isoform X3 [Homo sapiens]	22.7642	4	4	4	246	26.8	8.6	16.41	4		XP_006721957.1
578830915	PREDICTED: galectin-9 isoform X4 [Homo sapiens]	23.9316	4	4	4	234	25.6	8.6	16.41	4		XP_006721958.1
578836330	PREDICTED: histone H2B type F-S-like [Homo sapiens]	20.6349	2	3	2	126	13.9	10.37	9.85	2		XP_006723981.1
578836536	PREDICTED: integrin beta-2 isoform X1 [Homo sapiens]	7.14286	3	3	3	700	77.3	6.89	8.79	3		XP_006724064.1
578837316	PREDICTED: ras-related C3 botulinum toxin substrate 2 isoform X1 [Homo sapiens]	22.9814	4	4	4	161	18	6.32	8.98	4		XP_006724349.1
578839332	PREDICTED: glucosylceramidase isoform X1 [Homo sapiens]	11.5672	4	4	4	536	59.6	7.42	14.54	4		XP_006726274.1
578841853	PREDICTED: major histocompatibility complex, class I, B isoform X5 [Homo sapiens]	23.9506	7	8	0	405	44.5	6.16	32.45	7		XP_006725968.1
578846900	PREDICTED: histone H2B type F-S-like [Homo sapiens]	20.6349	2	3	2	126	13.9	10.32	9.85	2		XP_006726868.1
583966148	isocitrate dehydrogenase [NADP], mitochondrial isoform 2 [Homo sapiens]	9.75	4	5	4	400	45.2	7.75	12.08	4		NP_001276839.1
586798196	atlastin-3 isoform 2 [Homo sapiens]	5.73614	2	2	2	523	58.7	5.64	5.89	2		NP_001276977.1
588282794	isocitrate dehydrogenase [NADP], mitochondrial isoform 3 [Homo sapiens]	5.59006	2	3	2	322	36.1	8.38	9.27	2		NP_001277043.1
645912968	tubulin beta chain isoform a [Homo sapiens]	33.8362	12	14	0	464	52	4.96	52.2	12		NP_001280141.1
645912972	tubulin beta chain isoform c [Homo sapiens]	31.8182	7	7	5	242	27.3	4.5	29.71	7		NP_001280142.1
645912975	tubulin beta chain isoform d [Homo sapiens]	36.25	11	13	0	400	44.8	4.98	48.25	11		NP_001280143.1
645912980	tubulin beta chain isoform e [Homo sapiens]	34.9462	10	12	0	372	41.7	4.91	43.72	10		NP_001280144.1
661902998	heterogeneous nuclear ribonucleoprotein M isoform c [Homo sapiens]	9.2437	4	4	4	595	63	8.78	10.7	4		NP_001284347.1
662033848	cytochrome b-c1 complex subunit 6, mitochondrial isoform 3 precursor [Homo sapiens]	32.9268	2	2	2	82	9.6	4.73	7.98	2		NP_001284495.1
662033881	cytochrome b-c1 complex subunit 6, mitochondrial isoform 2 precursor [Homo sapiens]	31.7647	2	2	2	85	9.9	5.45	7.98	2		NP_001284494.1
665821274	peptidyl-prolyl cis-trans isomerase A isoform 2 [Homo sapiens]	37.1429	3	5	3	105	11.4	7.9	16.34	3		NP_001287910.1
733214499	transmembrane emp24 domain-containing protein 4 isoform 4 [Homo sapiens]	36.2205	3	3	3	127	14.4	7.12	9.12	3		NP_001289989.1
733215034	transmembrane emp24 domain-containing protein 4 isoform 5 [Homo sapiens]	27.381	3	3	3	168	19.6	9	9.12	3		NP_001289991.1
733215142	transmembrane emp24 domain-containing protein 4 isoform 2 precursor [Homo sapiens]	24.7312	3	3	3	186	20.8	6.87	9.12	3		NP_001289987.1
733605064	tubulin alpha-1C chain isoform b [Homo sapiens]	36.9565	11	13	5	414	46	5.12	46.44	11		NP_001290045.1
733605926	tubulin alpha-1C chain isoform a [Homo sapiens]	29.4798	11	13	5	519	57.7	5.07	46.44	11		NP_001290043.1
735367803	integrin beta-2 isoform 1 precursor [Homo sapiens]	6.50195	3	3	3	769	84.7	6.98	8.79	3		NP_001120963.2
740087125	myosin regulatory light chain 12A isoform 1 [Homo sapiens]	17.5439	2	2	2	171	19.8	4.81	8.25	2		NP_001289976.1
740087210	myosin regulatory light chain 12A isoform 2 [Homo sapiens]	16.9492	2	2	2	177	20.4	4.75	8.25	2		NP_001289978.1
742670570	far upstream element-binding protein 1 isoform 1 [Homo sapiens]	4.66165	2	2	2	665	69.8	7.36	6.7	2		NP_001290362.1
746815975	tubulin beta-6 chain isoform 1 [Homo sapiens]	6.72646	4	5	4	446	49.8	4.88	15.86	4		NP_001290453.1
746815977	tubulin beta-6 chain isoform 5 [Homo sapiens]	7.87402	4	5	4	381	42.5	4.83	15.86	4		NP_001290457.1
746815999	tubulin beta-6 chain isoform 6 [Homo sapiens]	10	4	5	4	300	34.1	4.84	15.86	4		NP_001290459.1
746816060	tubulin beta-6 chain isoform 3 [Homo sapiens]	7.33496	4	5	4	409	45.7	4.84	15.86	4		NP_001290455.1
746816073	tubulin beta-6 chain isoform 4 [Homo sapiens]	8.02139	4	5	4	374	41.9	4.91	15.86	4		NP_001290456.1
746817426	60S ribosomal protein L10 isoform b [Homo sapiens]	7.87037	2	2	2	216	24.1	9.72	1.73	2		NP_001243506.2
746817430	60S ribosomal protein L10 isoform c [Homo sapiens]	15.7303	3	3	3	178	20.4	10.52	5.33	3		NP_001243509.2
746817432	60S ribosomal protein L10 isoform a [Homo sapiens]	13.0841	3	3	3	214	24.6	10.08	5.33	3		NP_001290554.1
746817434	60S ribosomal protein L10 isoform d [Homo sapiens]	11.7241	2	2	2	145	16.5	9.35	1.73	2		NP_001290555.1
747165394	malectin isoform 2 [Homo sapiens]	18.1818	3	3	3	209	23.9	5.14	11.44	3		NP_001290556.1
747165396	malectin isoform 3 precursor [Homo sapiens]	11.5207	2	2	2	217	23.9	9.5	9.17	2		NP_001290557.1
756761757	protein lunapark isoform 5 [Homo sapiens]	22.623	3	3	3	305	33	4.82	6.23	3		NP_001291940.1
756761773	protein lunapark isoform 1 precursor [Homo sapiens]	13.9676	3	3	3	494	54.8	5.07	6.23	3		NP_001291937.1
756761793	protein lunapark isoform 2 [Homo sapiens]	15.0327	3	3	3	459	50.8	5.08	6.23	3		NP_001291938.1
756992484	protein lunapark isoform 3 precursor [Homo sapiens]	16.0465	3	3	3	430	47.2	5.05	6.23	3		NP_001291939.1
767903710	PREDICTED: D-3-phosphoglycerate dehydrogenase isoform X1 [Homo sapiens]	5.43657	3	3	3	607	64.7	6.87	10.88	3		XP_011539528.1
767903712	PREDICTED: D-3-phosphoglycerate dehydrogenase isoform X2 [Homo sapiens]	5.67986	3	3	3	581	61.5	7.03	10.88	3		XP_011539529.1
767903714	PREDICTED: D-3-phosphoglycerate dehydrogenase isoform X3 [Homo sapiens]	5.78947	3	3	3	570	60.5	7.03	10.88	3		XP_011539530.1
767903716	PREDICTED: D-3-phosphoglycerate dehydrogenase isoform X4 [Homo sapiens]	4.29688	2	2	2	512	54.5	7.24	7.22	2		XP_011539531.1
767903718	PREDICTED: D-3-phosphoglycerate dehydrogenase isoform X5 [Homo sapiens]	5.02283	2	2	2	438	46.5	7.14	7.22	2		XP_011539532.1
767903720	PREDICTED: D-3-phosphoglycerate dehydrogenase isoform X6 [Homo sapiens]	5.05747	2	2	2	435	46.5	7.72	7.22	2		XP_011539533.1
767912428	PREDICTED: galectin-8 isoform X1 [Homo sapiens]	5.77508	2	2	2	329	36.8	9.44	6.69	2		XP_011542490.1
767913703	PREDICTED: MICOS complex subunit MIC60 isoform X4 [Homo sapiens]	27.5862	9	9	9	464	52.8	5.87	26.91	9		XP_011530799.1
767914416	PREDICTED: trifunctional enzyme subunit beta, mitochondrial isoform X1 [Homo sapiens]	3.5865	2	2	2	474	51.3	9.41	2.74	2		XP_011531105.1
767914418	PREDICTED: trifunctional enzyme subunit beta, mitochondrial isoform X2 [Homo sapiens]	3.76106	2	2	2	452	48.8	9.17	2.74	2		XP_011531106.1
767918223	PREDICTED: POTE ankyrin domain family member E isoform X1 [Homo sapiens]	8.88192	7	9	3	957	107.7	6.68	28.98	7		XP_011509518.1
767918225	PREDICTED: POTE ankyrin domain family member E isoform X2 [Homo sapiens]	9.1104	7	9	3	933	105	6.39	28.98	7		XP_011509519.1
767919342	PREDICTED: POTE ankyrin domain family member I isoform X1 [Homo sapiens]	4.23963	5	6	2	1085	122.4	6.2	13.67	5		XP_011509972.1
767919377	PREDICTED: POTE ankyrin domain family member J isoform X1 [Homo sapiens]	3.33969	4	4	2	1048	118.5	5.96	10.76	4		XP_011509985.1
767919570	PREDICTED: POTE ankyrin domain family member F isoform X2 [Homo sapiens]	5.89914	6	8	2	1051	118.7	5.95	22.38	6		XP_011510064.1
767920009	PREDICTED: protein lunapark isoform X3 [Homo sapiens]	19.5467	3	3	3	353	38.8	4.98	6.23	3		XP_011510247.1
767927341	PREDICTED: guanine nucleotide-binding protein subunit beta-4 isoform X2 [Homo sapiens]	9.79592	2	2	1	245	27.2	7.03	5.67	2		XP_011511363.1
767932770	PREDICTED: ADP/ATP translocase 4 isoform X1 [Homo sapiens]	5.88235	2	2	0	272	30.4	9.95	4.7	2		XP_011530599.1
767932772	PREDICTED: ADP/ATP translocase 4 isoform X2 [Homo sapiens]	7.14286	2	2	0	224	25.2	10.08	4.7	2		XP_011530600.1
767934332	PREDICTED: NAD(P) transhydrogenase, mitochondrial isoform X1 [Homo sapiens]	2.11786	2	2	2	1086	113.8	8.09	6.62	2		XP_011512303.1
767938358	PREDICTED: heterogeneous nuclear ribonucleoprotein H isoform X1 [Homo sapiens]	5.50847	2	2	2	472	51.2	6.8	6.77	2		XP_011532848.1
767938360	PREDICTED: heterogeneous nuclear ribonucleoprotein H isoform X2 [Homo sapiens]	5.62771	2	2	2	462	50.2	6.8	6.77	2		XP_011532849.1
767939897	PREDICTED: major histocompatibility complex, class I, B isoform X1 [Homo sapiens]	19.8391	5	6	1	373	41.2	5.73	24.91	5		XP_011512858.1
767939899	PREDICTED: major histocompatibility complex, class I, B isoform X7 [Homo sapiens]	22.9102	5	6	1	323	36.6	5.58	24.91	5		XP_011512859.1
767939917	PREDICTED: HLA class I histocompatibility antigen, alpha chain F isoform X2 [Homo sapiens]	8.45481	2	3	1	343	38.7	5.66	13.47	2		XP_011512865.1
767939943	PREDICTED: tubulin beta-2B chain isoform X1 [Homo sapiens]	19.0349	6	8	6	373	41.9	4.91	28	6		XP_011512873.1
767942082	PREDICTED: elongation factor 1-alpha 1 isoform X1 [Homo sapiens]	23.5931	7	9	7	462	50.1	9.01	33.53	7		XP_011533816.1
767943698	PREDICTED: syntaxin-7 isoform X1 [Homo sapiens]	10.4603	2	2	2	239	27.4	5.12	8.78	2		XP_011534480.1
767948171	PREDICTED: MICOS complex subunit MIC19 isoform X1 [Homo sapiens]	33.1897	7	10	7	232	26.7	7.75	32.14	7		XP_011514665.1
767951862	PREDICTED: DNA-dependent protein kinase catalytic subunit isoform X1 [Homo sapiens]	0.67813	2	2	2	4129	468.9	7.12	8.83	2		XP_011515869.1
767954484	PREDICTED: golgi-associated plant pathogenesis-related protein 1 isoform X1 [Homo sapiens]	16.0839	2	2	2	143	15.9	9.74	6.97	2		XP_011516016.1
767956535	PREDICTED: dynamin-1 isoform X6 [Homo sapiens]	1.73611	2	2	2	864	97	7.01	4.48	2		XP_011516636.1
767956537	PREDICTED: dynamin-1 isoform X7 [Homo sapiens]	1.73611	2	2	2	864	97	7.34	4.48	2		XP_011516637.1
767956539	PREDICTED: dynamin-1 isoform X8 [Homo sapiens]	1.73611	2	2	2	864	97.2	7.74	4.48	2		XP_011516638.1
767956545	PREDICTED: dynamin-1 isoform X9 [Homo sapiens]	2.72232	2	2	2	551	62.5	7.81	4.48	2		XP_011516640.1
767957185	PREDICTED: gelsolin isoform X3 [Homo sapiens]	12.8302	6	6	6	795	87	6.28	28.34	6		XP_006717138.2
767957187	PREDICTED: gelsolin isoform X4 [Homo sapiens]	13.0769	6	6	6	780	86.1	5.83	28.34	6		XP_011516886.1
767957189	PREDICTED: gelsolin isoform X5 [Homo sapiens]	13.4034	6	6	6	761	83.8	5.63	28.34	6		XP_011516887.1
767957196	PREDICTED: gelsolin isoform X2 [Homo sapiens]	13.7466	6	6	6	742	81.9	5.85	28.34	6		XP_011516890.1
767957209	PREDICTED: gelsolin isoform X7 [Homo sapiens]	9.24956	3	3	3	573	62.8	5.82	16.74	3		XP_011516896.1
767960019	PREDICTED: tubulin beta-8 chain isoform X1 [Homo sapiens]	16.6667	5	6	5	372	41.8	4.87	23.21	5		XP_011517761.1
767960021	PREDICTED: tubulin beta-8 chain isoform X2 [Homo sapiens]	10.3093	4	5	4	291	33	4.84	15.86	4		XP_011517762.1
767960085	PREDICTED: ATP synthase subunit gamma, mitochondrial isoform X1 [Homo sapiens]	9.16335	2	2	2	251	27.6	6.81	6.65	2		XP_011517792.1
767966854	PREDICTED: CD44 antigen isoform X7 [Homo sapiens]	4.2963	3	3	3	675	74.4	5.2	4.93	3		XP_011518784.1
767966856	PREDICTED: CD44 antigen isoform X8 [Homo sapiens]	4.40729	3	3	3	658	72	5.67	4.93	3		XP_011518785.1
767966858	PREDICTED: CD44 antigen isoform X9 [Homo sapiens]	4.414	3	3	3	657	72	5.67	4.93	3		XP_011518786.1
767966860	PREDICTED: CD44 antigen isoform X10 [Homo sapiens]	4.42073	3	3	3	656	71.9	5.67	4.93	3		XP_011518787.1
767966862	PREDICTED: CD44 antigen isoform X13 [Homo sapiens]	5.40037	3	3	3	537	58.2	5.71	4.93	3		XP_011518788.1
767966864	PREDICTED: CD44 antigen isoform X15 [Homo sapiens]	4.70852	2	2	2	446	50	4.92	2.48	2		XP_011518789.1
767966866	PREDICTED: CD44 antigen isoform X16 [Homo sapiens]	6.82353	3	3	3	425	46.2	5.16	4.93	3		XP_011518790.1
767966868	PREDICTED: CD44 antigen isoform X17 [Homo sapiens]	5.22388	2	2	2	402	45	4.84	2.48	2		XP_011518791.1
767967849	PREDICTED: atlastin-3 isoform X2 [Homo sapiens]	8.69565	2	2	2	345	39	6.38	5.89	2		XP_011543204.1
767968868	PREDICTED: fermitin family homolog 3 isoform X1 [Homo sapiens]	5.54723	3	3	3	667	75.9	6.98	10.38	3		XP_011543596.1
767970091	PREDICTED: heat shock cognate 71 kDa protein isoform X1 [Homo sapiens]	25.5418	15	17	13	646	70.9	5.52	56.06	15		XP_011541100.1
767974397	PREDICTED: sarcoplasmic/endoplasmic reticulum calcium ATPase 2 isoform X1 [Homo sapiens]	2.002	2	2	2	999	109.8	5.36	9.32	2		XP_011536704.1
767974399	PREDICTED: sarcoplasmic/endoplasmic reticulum calcium ATPase 2 isoform X2 [Homo sapiens]	2.35849	2	2	2	848	92.8	5.73	9.32	2		XP_011536705.1
767975060	PREDICTED: 60S ribosomal protein L6 isoform X2 [Homo sapiens]	17.5141	3	3	3	177	20.4	10.52	8.47	3		XP_011536949.1
767979244	PREDICTED: lysosome-associated membrane glycoprotein 1 isoform X1 [Homo sapiens]	8.0402	3	3	3	398	42.9	8.5	12.05	3		XP_011535796.1
767979246	PREDICTED: lysosome-associated membrane glycoprotein 1 isoform X2 [Homo sapiens]	8.79121	3	3	3	364	39	8.87	12.05	3		XP_011535797.1
767980428	PREDICTED: heterogeneous nuclear ribonucleoproteins C1/C2 isoform X1 [Homo sapiens]	7.18954	2	2	2	306	33.7	5.08	3.33	2		XP_011535013.1
767980445	PREDICTED: heat shock protein HSP 90-alpha isoform X1 [Homo sapiens]	9.96483	5	6	2	853	98	5.16	20.79	5		XP_011535020.1
767983911	PREDICTED: aminopeptidase N isoform X1 [Homo sapiens]	3.72285	4	4	4	967	109.5	5.48	13.53	4		XP_011519775.1
767983913	PREDICTED: aminopeptidase N isoform X2 [Homo sapiens]	5.35714	4	4	4	672	75.4	5.5	13.53	4		XP_011519776.1
767984412	PREDICTED: pyruvate kinase PKM isoform X4 [Homo sapiens]	7.24382	3	3	3	566	61.4	7.81	11.17	3		XP_011519972.1
767984414	PREDICTED: pyruvate kinase PKM isoform X5 [Homo sapiens]	5.30035	2	2	2	566	61.6	7.68	8.28	2		XP_011519973.1
767984416	PREDICTED: pyruvate kinase PKM isoform X6 [Homo sapiens]	7.42754	3	3	3	552	60.2	7.84	11.17	3		XP_011519974.1
767984418	PREDICTED: pyruvate kinase PKM isoform X7 [Homo sapiens]	5.43478	2	2	2	552	60.3	7.69	8.28	2		XP_011519975.1
767987173	PREDICTED: heme oxygenase 2 isoform X1 [Homo sapiens]	8.37838	2	2	2	370	41.6	5.44	8.97	2		XP_011520775.1
767987246	PREDICTED: myosin-11 isoform X1 [Homo sapiens]	2.07361	4	6	4	1929	222.5	5.54	19.01	4		XP_011520804.1
767988216	PREDICTED: coronin-1A isoform X1 [Homo sapiens]	13.449	5	5	5	461	51	6.68	17.37	5		XP_011544016.1
767988554	PREDICTED: integrin alpha-M isoform X1 [Homo sapiens]	7.24106	7	7	7	1091	120.4	7.47	23.15	7		XP_011544152.1
767988754	PREDICTED: elongation factor Tu, mitochondrial isoform X1 [Homo sapiens]	7.96253	2	2	2	427	46.8	7.39	6.25	2		XP_011544230.1
767989283	PREDICTED: liver carboxylesterase 1 isoform X2 [Homo sapiens]	13.7838	3	3	3	370	40.1	6.8	12.93	3		XP_011521118.1
767989403	PREDICTED: cytochrome c oxidase subunit 4 isoform 1, mitochondrial isoform X2 [Homo sapiens]	37.1429	5	5	5	175	20.1	9.6	16.19	5		XP_011521173.1
767991998	PREDICTED: galectin-9B isoform X1 [Homo sapiens]	11.7978	3	3	3	356	39.6	9.52	13.16	3		XP_006721568.2
767992000	PREDICTED: galectin-9B isoform X2 [Homo sapiens]	12.069	3	3	3	348	39	9.76	13.16	3		XP_011522101.1
767992002	PREDICTED: galectin-9B isoform X3 [Homo sapiens]	12.963	3	3	3	324	36	8.78	13.16	3		XP_011522102.1
767992004	PREDICTED: galectin-9B isoform X4 [Homo sapiens]	13.0031	3	3	3	323	35.9	8.78	13.16	3		XP_011522103.1
767992006	PREDICTED: galectin-9B isoform X5 [Homo sapiens]	13.4615	3	3	3	312	34.8	8.57	13.16	3		XP_011522104.1
767992008	PREDICTED: galectin-9B isoform X6 [Homo sapiens]	13.5048	3	3	3	311	34.7	8.57	13.16	3		XP_011522105.1
767992010	PREDICTED: galectin-9B isoform X7 [Homo sapiens]	13.8158	3	3	3	304	33.2	9.63	13.16	3		XP_011522106.1
767992012	PREDICTED: galectin-9B isoform X8 [Homo sapiens]	15.0538	3	3	3	279	30.6	9.77	13.16	3		XP_011522107.1
767992014	PREDICTED: galectin-9B isoform X9 [Homo sapiens]	15.1079	3	3	3	278	30.5	9.77	13.16	3		XP_011522108.1
767992016	PREDICTED: galectin-9B isoform X10 [Homo sapiens]	15.4412	3	3	3	272	29.9	10.23	13.16	3		XP_011522109.1
767992018	PREDICTED: galectin-9B isoform X11 [Homo sapiens]	11.194	2	2	2	268	30.2	9.77	8.76	2		XP_011522110.1
767992184	PREDICTED: myosin-10 isoform X2 [Homo sapiens]	5.10555	9	12	9	2037	235.7	5.6	38.65	9		XP_011522177.1
767992186	PREDICTED: myosin-10 isoform X3 [Homo sapiens]	5.10806	9	12	9	2036	235.6	5.6	38.65	9		XP_011522178.1
767992188	PREDICTED: myosin-10 isoform X4 [Homo sapiens]	5.13074	9	12	9	2027	234.5	5.57	38.65	9		XP_011522179.1
767992190	PREDICTED: myosin-10 isoform X5 [Homo sapiens]	5.15873	9	12	9	2016	233.3	5.62	38.65	9		XP_011522180.1
767992192	PREDICTED: myosin-10 isoform X6 [Homo sapiens]	5.16129	9	12	9	2015	233.2	5.62	38.65	9		XP_011522181.1
767992194	PREDICTED: myosin-10 isoform X7 [Homo sapiens]	5.18445	9	12	9	2006	232.2	5.58	38.65	9		XP_011522182.1
767992494	PREDICTED: galectin-9C isoform X2 [Homo sapiens]	12.963	3	3	3	324	36	8.38	13.16	3		XP_011522295.1
767992496	PREDICTED: galectin-9C isoform X4 [Homo sapiens]	13.4615	3	3	3	312	34.8	8.21	13.16	3		XP_011522296.1
767992498	PREDICTED: galectin-9C isoform X5 [Homo sapiens]	13.8158	3	3	3	304	33.1	9.29	13.16	3		XP_011522297.1
767992500	PREDICTED: galectin-9C isoform X6 [Homo sapiens]	11.194	2	2	2	268	30.2	9.77	8.76	2		XP_011522298.1
767994737	PREDICTED: galectin-9 isoform X5 [Homo sapiens]	19.0045	3	3	3	221	24.3	8.81	12.41	3		XP_011523098.1
767997951	PREDICTED: vesicle-associated membrane protein-associated protein A isoform X1 [Homo sapiens]	29.1815	4	4	4	281	31.4	8.94	14.87	4		XP_011524071.1
768000711	PREDICTED: coatomer subunit epsilon isoform X1 [Homo sapiens]	10.8761	2	2	2	331	36.9	5.16	6.17	2		XP_011525957.1
768000715	PREDICTED: coatomer subunit epsilon isoform X2 [Homo sapiens]	12.9032	2	2	2	279	31.2	5.31	6.17	2		XP_011525958.1
768011134	PREDICTED: myosin-14 isoform X2 [Homo sapiens]	1.86001	3	4	3	2043	232.9	5.68	12.67	3		XP_011525622.1
768011138	PREDICTED: myosin-14 isoform X3 [Homo sapiens]	1.86732	3	4	3	2035	232.2	5.68	12.67	3		XP_011525623.1
768011142	PREDICTED: myosin-14 isoform X4 [Homo sapiens]	1.88961	3	4	3	2011	229.4	5.66	12.67	3		XP_011525624.1
768011147	PREDICTED: myosin-14 isoform X1 [Homo sapiens]	1.89715	3	4	3	2003	228.5	5.6	12.67	3		XP_011525625.1
768024950	PREDICTED: myosin-9 isoform X1 [Homo sapiens]	18.9796	32	43	32	1960	226.4	5.6	156.91	32		XP_011528499.1
768038658	PREDICTED: plastin-3 isoform X1 [Homo sapiens]	3.33333	2	2	2	630	70.8	5.6	3.9	2		XP_011535836.1
768040143	PREDICTED: vesicle-associated membrane protein 7 isoform X1 [Homo sapiens]	16.4319	2	2	2	213	25.1	8.24	7.87	2		XP_011529490.1
768040779	PREDICTED: 40S ribosomal protein S4, Y isoform 2 isoform X1 [Homo sapiens]	13.4146	4	5	4	246	27.3	9.79	11.59	4		XP_011529725.1
768043533	PREDICTED: heat shock 70 kDa protein 1-like isoform X1 [Homo sapiens]	6.86427	3	3	1	641	70.4	6.29	10.58	3		XP_011544613.1
768045146	PREDICTED: liver carboxylesterase 1 isoform X2 [Homo sapiens]	13.7838	3	3	3	370	40	6.61	12.93	3		XP_011545297.1
768047362	PREDICTED: major histocompatibility complex, class I, B isoform X1 [Homo sapiens]	23.0563	6	7	1	373	41.1	5.6	28.63	6		XP_011545539.1
768047364	PREDICTED: major histocompatibility complex, class I, B isoform X2 [Homo sapiens]	23.7569	6	7	1	362	40.3	5.71	28.63	6		XP_011545540.1
768047366	PREDICTED: major histocompatibility complex, class I, B isoform X7 [Homo sapiens]	26.6254	6	7	1	323	36.5	5.47	28.63	6		XP_011545541.1
768047381	PREDICTED: HLA class I histocompatibility antigen, alpha chain F isoform X2 [Homo sapiens]	8.45481	2	3	1	343	38.6	5.66	13.47	2		XP_011545546.1
768047388	PREDICTED: heat shock 70 kDa protein 1-like isoform X2 [Homo sapiens]	6.24113	3	3	1	705	77.5	7.66	10.58	3		XP_011545549.1
768051085	PREDICTED: major histocompatibility complex, class I, B isoform X4 [Homo sapiens]	19.4737	5	6	0	380	42.8	6.55	24.43	5		XP_011546175.1
768051089	PREDICTED: major histocompatibility complex, class I, B isoform X7 [Homo sapiens]	22.9102	5	6	0	323	36.6	5.86	24.43	5		XP_011546176.1
768052080	PREDICTED: major histocompatibility complex, class I, B isoform X7 [Homo sapiens]	30.031	7	8	0	323	36.5	5.99	32.45	7		XP_011546344.1
768052270	PREDICTED: tapasin isoform X1 [Homo sapiens]	4.4289	2	2	2	429	45.6	7.17	2.84	2		XP_011546379.1
768052562	PREDICTED: HLA class I histocompatibility antigen, A-1 alpha chain isoform X1 [Homo sapiens]	10.4972	3	3	0	362	40.6	6.99	11.78	3		XP_011546426.1
768053214	PREDICTED: major histocompatibility complex, class I, B isoform X7 [Homo sapiens]	33.4365	8	9	3	323	36.4	6.47	36.24	8		XP_011546532.1
768053411	PREDICTED: tapasin isoform X1 [Homo sapiens]	4.4289	2	2	2	429	45.6	7.37	2.84	2		XP_011546568.1
768054000	PREDICTED: 40S ribosomal protein S9 isoform X1 [Homo sapiens]	11.3402	3	3	3	194	22.6	10.65	8.5	3		XP_011546661.1
768054317	PREDICTED: major histocompatibility complex, class I, B isoform X7 [Homo sapiens]	22.9102	5	6	0	323	36.6	5.72	24.43	5		XP_011546724.1

## Sheet: U1_CBD_TNE300
Accession	Description	Coverage	# Peptides	# PSMs	# Unique Peptides	# AAs	MW [kDa]	calc. pI	Score A Sequest HT	# Peptides A Sequest HT		Protein Accession
4501881	actin, alpha skeletal muscle [Homo sapiens]	30.2387	11	22	1	377	42	5.39	77.13	11		NP_001091.1
4501883	actin, aortic smooth muscle [Homo sapiens]	27.321	10	20	1	377	42	5.39	69.23	10		NP_001604.1
4501885	actin, cytoplasmic 1 [Homo sapiens]	54.4	17	28	7	375	41.7	5.48	92.36	17		NP_001092.1
4501889	actin, gamma-enteric smooth muscle isoform 1 precursor [Homo sapiens]	27.3936	10	20	1	376	41.9	5.48	69.23	10		NP_001606.1
4502027	serum albumin preproprotein [Homo sapiens]	6.23974	4	6	4	609	69.3	6.28	19.63	4		NP_000468.1
4502303	ATP synthase subunit O, mitochondrial precursor [Homo sapiens]	51.6432	9	11	9	213	23.3	9.96	38.11	9		NP_001688.1
4503475	elongation factor 1-alpha 2 [Homo sapiens]	14.0389	6	8	6	463	50.4	9.03	24.79	6		NP_001949.1
4503483	elongation factor 2 [Homo sapiens]	5.36131	3	3	3	858	95.3	6.83	11.11	3		NP_001952.1
4503571	alpha-enolase isoform 1 [Homo sapiens]	6.45161	2	2	2	434	47.1	7.39	9.54	2		NP_001419.1
4504041	guanine nucleotide-binding protein G(i) subunit alpha-2 isoform 1 [Homo sapiens]	11.2676	4	4	4	355	40.4	5.54	15.84	4		NP_002061.1
4504151	granulins precursor [Homo sapiens]	8.09444	4	4	4	593	63.5	6.83	13.74	4		NP_002078.1
4504183	glutathione S-transferase P [Homo sapiens]	14.2857	2	2	2	210	23.3	5.64	6.54	2		NP_000843.1
4504245	histone H2A type 1-C [Homo sapiens]	32.3077	3	3	2	130	14.1	11.05	10.88	3		NP_003503.1
4504249	histone H2A type 1 [Homo sapiens]	32.3077	3	3	2	130	14.1	10.9	10.88	3		NP_003505.1
4504253	histone H2AX [Homo sapiens]	16.0839	2	2	1	143	15.1	10.74	6	2		NP_002096.1
4504255	histone H2A.Z [Homo sapiens]	17.9688	2	2	1	128	13.5	10.58	4.88	2		NP_002097.1
4504259	histone H2B type 1-L [Homo sapiens]	26.1905	3	5	3	126	13.9	10.32	17.3	3		NP_003510.1
4504261	histone H2B type 1-N [Homo sapiens]	26.1905	3	5	3	126	13.9	10.32	17.3	3		NP_003511.1
4504263	histone H2B type 1-M [Homo sapiens]	26.1905	3	5	3	126	14	10.32	17.3	3		NP_003512.1
4504269	histone H2B type 1-H [Homo sapiens]	26.1905	3	5	3	126	13.9	10.32	17.3	3		NP_003515.1
4504277	histone H2B type 2-E [Homo sapiens]	26.1905	3	5	3	126	13.9	10.32	17.3	3		NP_003519.1
4504323	histone H4 [Homo sapiens]	38.835	4	4	4	103	11.4	11.36	12.08	4		NP_003539.1
4504347	hemoglobin subunit alpha [Homo sapiens]	16.9014	2	2	2	142	15.2	8.68	8.19	2		NP_000549.1
4504349	hemoglobin subunit beta [Homo sapiens]	12.9252	2	2	2	147	16	7.28	6.31	2		NP_000509.1
4504351	hemoglobin subunit delta [Homo sapiens]	12.9252	2	2	2	147	16	8.05	6.31	2		NP_000510.1
4504981	galectin-1 [Homo sapiens]	54.0741	5	7	5	135	14.7	5.5	24.16	5		NP_002296.1
4505257	moesin [Homo sapiens]	3.4662	2	2	2	577	67.8	6.4	2.67	2		NP_002435.1
4505763	phosphoglycerate kinase 1 [Homo sapiens]	17.2662	5	5	5	417	44.6	8.1	20.8	5		NP_000282.1
4505881	plasminogen isoform 1 precursor [Homo sapiens]	4.44444	4	10	4	810	90.5	7.24	36.11	4		NP_000292.1
4506605	60S ribosomal protein L23 [Homo sapiens]	25.7143	3	3	3	140	14.9	10.51	10.65	3		NP_000969.1
4506607	60S ribosomal protein L18 isoform 1 [Homo sapiens]	21.2766	4	5	4	188	21.6	11.72	14.13	4		NP_000970.1
4506661	60S ribosomal protein L7a [Homo sapiens]	23.3083	4	4	4	266	30	10.61	13.92	4		NP_000963.1
4506663	60S ribosomal protein L8 [Homo sapiens]	10.5058	2	2	2	257	28	11.03	3.6	2		NP_000964.1
4506671	60S acidic ribosomal protein P2 [Homo sapiens]	39.1304	2	2	2	115	11.7	4.54	9.58	2		NP_000995.1
4506691	40S ribosomal protein S16 [Homo sapiens]	25.3425	3	3	3	146	16.4	10.21	9.33	3		NP_001011.1
4506697	40S ribosomal protein S20 isoform 2 [Homo sapiens]	28.5714	3	3	3	119	13.4	9.94	7.61	3		NP_001014.1
4506723	40S ribosomal protein S3a isoform 1 [Homo sapiens]	12.5	3	3	3	264	29.9	9.73	4.81	3		NP_000997.1
4506725	40S ribosomal protein S4, X isoform X isoform [Homo sapiens]	17.8707	4	4	4	263	29.6	10.15	17.51	4		NP_000998.1
4507677	endoplasmin precursor [Homo sapiens]	8.84184	5	5	5	803	92.4	4.84	18.18	5		NP_003290.1
4507729	tubulin beta-2A chain [Homo sapiens]	22.4719	7	9	1	445	49.9	4.89	47.38	7		NP_001060.1
4507879	voltage-dependent anion-selective channel protein 1 [Homo sapiens]	10.9541	2	2	2	283	30.8	8.54	4.51	2		NP_003365.1
4507949	14-3-3 protein beta/alpha [Homo sapiens]	9.7561	2	2	2	246	28.1	4.83	6.23	2		NP_003395.1
4557014	catalase [Homo sapiens]	9.29791	3	3	3	527	59.7	7.39	10.47	3		NP_001743.1
4557237	acetyl-CoA acetyltransferase, mitochondrial precursor [Homo sapiens]	13.3489	4	4	3	427	45.2	8.85	17.85	4		NP_000010.1
4557305	fructose-bisphosphate aldolase A isoform 1 [Homo sapiens]	7.96703	2	2	2	364	39.4	8.09	2.36	2		NP_000025.1
4557894	lysozyme C precursor [Homo sapiens]	41.8919	4	5	4	148	16.5	9.16	22.24	4		NP_000230.1
4757900	calreticulin precursor [Homo sapiens]	8.8729	4	4	4	417	48.1	4.44	11.65	4		NP_004334.1
4758112	spliceosome RNA helicase DDX39B [Homo sapiens]	7.71028	3	3	3	428	49	5.67	10.73	3		NP_004631.1
4826898	profilin-1 [Homo sapiens]	37.8571	5	6	5	140	15	8.27	24.26	5		NP_005013.1
4885049	actin, alpha cardiac muscle 1 proprotein [Homo sapiens]	30.2387	11	22	1	377	42	5.39	77.13	11		NP_005150.1
4885079	ATP synthase subunit gamma, mitochondrial isoform H (heart) precursor [Homo sapiens]	12.4579	3	3	3	297	32.9	9.31	5.61	3		NP_005165.1
5031635	cofilin-1 [Homo sapiens]	15.6627	2	2	2	166	18.5	8.09	7.49	2		NP_005498.1
5031839	keratin, type II cytoskeletal 6A [Homo sapiens]	3.90071	2	2	0	564	60	8	7	2		NP_005545.1
5031857	L-lactate dehydrogenase A chain isoform 1 [Homo sapiens]	19.8795	5	5	5	332	36.7	8.27	15.62	5		NP_005557.1
5031877	lamin-B1 isoform 1 [Homo sapiens]	5.46075	3	3	3	586	66.4	5.16	7.63	3		NP_005564.1
5174735	tubulin beta-4B chain [Homo sapiens]	35.0562	10	12	4	445	49.8	4.89	61.93	10		NP_006079.1
5453559	ATP synthase subunit d, mitochondrial isoform a [Homo sapiens]	16.1491	2	2	2	161	18.5	5.3	5.98	2		NP_006347.1
6912616	histone H2A.V isoform 1 [Homo sapiens]	17.9688	2	2	1	128	13.5	10.58	4.88	2		NP_036544.1
7669492	glyceraldehyde-3-phosphate dehydrogenase isoform 1 [Homo sapiens]	7.76119	2	3	2	335	36	8.46	5.39	2		NP_002037.2
8923390	MICOS complex subunit MIC19 [Homo sapiens]	16.7401	3	3	3	227	26.1	8.28	9.26	3		NP_060282.1
9507215	tubulin alpha-8 chain isoform 1 [Homo sapiens]	10.0223	3	5	1	449	50.1	5.06	22.16	3		NP_061816.1
9624998	heterogeneous nuclear ribonucleoprotein H2 [Homo sapiens]	5.79065	2	2	1	449	49.2	6.3	7.15	2		NP_062543.1
10800130	histone H2A type 1-D [Homo sapiens]	32.3077	3	3	2	130	14.1	10.9	10.88	3		NP_066409.1
10800140	histone H2B type 1-B [Homo sapiens]	26.1905	3	5	3	126	13.9	10.32	17.3	3		NP_066406.1
10800144	histone cluster 1, H2aj [Homo sapiens]	32.8125	3	3	2	128	13.9	10.89	10.88	3		NP_066544.1
10863927	peptidyl-prolyl cis-trans isomerase A isoform 1 [Homo sapiens]	38.1818	5	6	5	165	18	7.81	14.09	5		NP_066953.1
11415026	60S ribosomal protein L18a [Homo sapiens]	24.4318	6	7	6	176	20.7	10.71	14.95	6		NP_000971.1
11968182	40S ribosomal protein S18 [Homo sapiens]	17.1053	4	4	4	152	17.7	10.99	9.41	4		NP_072045.1
13676857	heat shock-related 70 kDa protein 2 [Homo sapiens]	3.44288	2	2	1	639	70	5.74	6.67	2		NP_068814.2
13904866	60S ribosomal protein L28 isoform 2 [Homo sapiens]	20.438	4	4	4	137	15.7	12.02	14.04	4		NP_000982.2
14141152	heterogeneous nuclear ribonucleoprotein M isoform a [Homo sapiens]	17.5342	9	10	9	730	77.5	8.7	39.4	9		NP_005959.2
14389309	tubulin alpha-1C chain isoform c [Homo sapiens]	21.1581	7	9	1	449	49.9	5.1	35.62	7		NP_116093.1
15431290	60S ribosomal protein L11 isoform 1 [Homo sapiens]	16.8539	3	3	3	178	20.2	9.6	10.08	3		NP_000966.2
15431301	60S ribosomal protein L7 [Homo sapiens]	9.27419	2	2	2	248	29.2	10.65	6.21	2		NP_000962.2
15431310	keratin, type I cytoskeletal 14 [Homo sapiens]	3.38983	2	2	2	472	51.6	5.16	5.4	2		NP_000517.2
15617199	histone H2A type 3 [Homo sapiens]	32.3077	3	3	2	130	14.1	11.05	10.88	3		NP_254280.1
16306566	histone H2B type 1-O [Homo sapiens]	26.1905	3	5	3	126	13.9	10.32	17.3	3		NP_003518.2
16507237	78 kDa glucose-regulated protein precursor [Homo sapiens]	30.8869	18	20	17	654	72.3	5.16	75.02	18		NP_005338.1
16579885	60S ribosomal protein L4 [Homo sapiens]	7.25995	4	4	4	427	47.7	11.06	11.12	4		NP_000959.2
17921989	tubulin alpha-4A chain isoform 1 [Homo sapiens]	17.4107	5	7	2	448	49.9	5.06	30.59	5		NP_005991.1
17921993	tubulin alpha-3C/D chain [Homo sapiens]	14.4444	4	4	2	450	49.9	5.1	17.66	4		NP_005992.1
18105045	histone H2A type 1-H [Homo sapiens]	32.8125	3	3	2	128	13.9	10.89	10.88	3		NP_542163.1
18105048	histone H2B type 1-K [Homo sapiens]	26.1905	3	5	3	126	13.9	10.32	17.3	3		NP_542160.1
19557656	histone H2A type 1-B/E [Homo sapiens]	32.3077	3	3	2	130	14.1	11.05	10.88	3		NP_003504.2
20070125	protein disulfide-isomerase precursor [Homo sapiens]	18.7008	9	9	9	508	57.1	4.87	30.61	9		NP_000909.2
20336752	histone H2B type 1-D [Homo sapiens]	26.1905	3	5	3	126	13.9	10.32	17.3	3		NP_619790.1
20336754	histone H2B type 1-J [Homo sapiens]	26.1905	3	5	3	126	13.9	10.32	17.3	3		NP_066402.2
21166389	histone H2B type 1-C/E/F/G/I [Homo sapiens]	26.1905	3	5	3	126	13.9	10.32	17.3	3		NP_003517.2
21361322	tubulin beta-4A chain isoform 3 [Homo sapiens]	25.4505	6	7	4	444	49.6	4.88	38.58	6		NP_006078.2
21361657	protein disulfide-isomerase A3 precursor [Homo sapiens]	19.2079	10	10	10	505	56.7	6.35	40.6	10		NP_005304.3
21464101	14-3-3 protein gamma [Homo sapiens]	9.7166	2	2	2	247	28.3	4.89	6.23	2		NP_036611.2
24234686	heat shock cognate 71 kDa protein isoform 2 [Homo sapiens]	21.501	11	11	10	493	53.5	5.86	35.46	11		NP_694881.1
24234688	stress-70 protein, mitochondrial precursor [Homo sapiens]	12.3711	6	6	6	679	73.6	6.16	26.48	6		NP_004125.3
24430192	keratin, type I cytoskeletal 16 [Homo sapiens]	3.38266	2	2	2	473	51.2	5.05	5.4	2		NP_005548.2
24586679	histone H2B type 1-A [Homo sapiens]	14.1732	2	3	2	127	14.2	10.32	6.94	2		NP_733759.1
24638446	histone H2A type 2-C [Homo sapiens]	32.5581	3	3	2	129	14	10.9	10.88	3		NP_003508.1
25092737	histone H2A type 1-A [Homo sapiens]	17.5573	2	2	1	131	14.2	10.86	6	2		NP_734466.1
28173554	histone H2B type 3-B [Homo sapiens]	20.6349	2	4	2	126	13.9	10.32	15.32	2		NP_778225.1
28178832	isocitrate dehydrogenase [NADP], mitochondrial isoform 1 precursor [Homo sapiens]	8.40708	4	4	4	452	50.9	8.69	7.62	4		NP_002159.2
29553970	histone H2A.J [Homo sapiens]	32.5581	3	3	2	129	14	10.9	10.88	3		NP_808760.1
29788768	tubulin beta-2B chain [Homo sapiens]	22.4719	7	9	1	445	49.9	4.89	47.38	7		NP_821080.1
29788785	tubulin beta chain isoform b [Homo sapiens]	41.6667	11	13	0	444	49.6	4.89	68.05	11		NP_821133.1
31542319	coatomer subunit epsilon isoform a [Homo sapiens]	19.1558	3	3	3	308	34.5	5.12	13.53	3		NP_009194.2
33286418	pyruvate kinase PKM isoform a [Homo sapiens]	5.64972	2	2	2	531	57.9	7.84	9.73	2		NP_002645.3
33286422	pyruvate kinase PKM isoform b [Homo sapiens]	5.64972	2	2	2	531	58	7.71	9.73	2		NP_872271.1
34147513	ras-related protein Rab-7a [Homo sapiens]	12.0773	2	2	2	207	23.5	6.7	8.2	2		NP_004628.4
34147630	elongation factor Tu, mitochondrial precursor [Homo sapiens]	10.1099	3	4	3	455	49.8	7.61	13.55	3		NP_003312.3
38202257	neutral alpha-glucosidase AB isoform 2 precursor [Homo sapiens]	5.08475	2	2	2	944	106.8	6.14	9.98	2		NP_938148.1
40805825	coatomer subunit epsilon isoform b [Homo sapiens]	12.0623	2	2	2	257	28.8	5.29	10.25	2		NP_955474.1
40805827	coatomer subunit epsilon isoform c [Homo sapiens]	17.5781	2	2	2	256	28.8	5.29	9.63	2		NP_955476.1
41399285	60 kDa heat shock protein, mitochondrial [Homo sapiens]	21.1169	9	9	9	573	61	5.87	29.61	9		NP_955472.1
42558279	tubulin beta-8 chain [Homo sapiens]	12.3874	3	3	2	444	49.7	4.89	13.07	3		NP_817124.1
46409270	tubulin alpha-3E chain [Homo sapiens]	14.4444	4	4	2	450	49.9	5.1	17.66	4		NP_997195.1
46593007	cytochrome b-c1 complex subunit 1, mitochondrial precursor [Homo sapiens]	4.16667	2	2	2	480	52.6	6.37	4.62	2		NP_003356.2
47132620	keratin, type II cytoskeletal 2 epidermal [Homo sapiens]	7.35524	3	3	2	639	65.4	8	13.01	3		NP_000414.2
50345982	ATP synthase subunit alpha, mitochondrial isoform c [Homo sapiens]	29.4235	14	16	14	503	54.5	8.24	55.89	14		NP_001001935.1
50345984	ATP synthase subunit alpha, mitochondrial isoform a precursor [Homo sapiens]	29.1139	15	17	15	553	59.7	9.13	59.39	15		NP_001001937.1
50345988	ATP synthase subunit gamma, mitochondrial isoform L (liver) precursor [Homo sapiens]	16.7785	4	4	4	298	33	9.22	10.22	4		NP_001001973.1
50592996	tubulin beta-3 chain isoform 1 [Homo sapiens]	11.1111	4	5	1	450	50.4	4.93	24.96	4		NP_006077.2
51479152	ATP synthase subunit d, mitochondrial isoform b [Homo sapiens]	18.9781	2	2	2	137	15.8	7.18	5.98	2		NP_001003785.1
55956899	keratin, type I cytoskeletal 9 [Homo sapiens]	41.7335	17	23	17	623	62	5.24	107.08	17		NP_000217.2
56676393	rho GDP-dissociation inhibitor 2 [Homo sapiens]	16.9154	3	3	3	201	23	5.21	9.27	3		NP_001166.3
57013276	tubulin alpha-1B chain [Homo sapiens]	24.8337	8	10	2	451	50.1	5.06	41.45	8		NP_006073.2
57864582	hornerin [Homo sapiens]	3.36842	2	2	2	2850	282.2	10.04	8.89	2		NP_001009931.1
58761500	obg-like ATPase 1 isoform 1 [Homo sapiens]	5.30303	2	2	2	396	44.7	7.81	6.54	2		NP_037473.3
63055057	beta-actin-like protein 2 [Homo sapiens]	13.2979	5	13	1	376	42	5.59	43.8	5		NP_001017992.1
63252886	prolyl 4-hydroxylase subunit alpha-1 isoform 1 precursor [Homo sapiens]	20.7865	10	10	10	534	60.9	6.01	32.72	10		NP_000908.2
66912162	histone H2B type 2-F isoform a [Homo sapiens]	26.1905	3	5	3	126	13.9	10.32	17.3	3		NP_001019770.1
78000183	60S ribosomal protein L14 [Homo sapiens]	11.1628	2	2	2	215	23.4	10.93	7.05	2		NP_001030168.1
88900491	neutral alpha-glucosidase AB isoform 3 precursor [Homo sapiens]	4.96894	2	2	2	966	109.4	6.24	9.98	2		NP_938149.2
106775678	histone H2A type 2-A [Homo sapiens]	32.3077	3	3	2	130	14.1	10.9	10.88	3		NP_001035807.1
114431246	keratin, type I cytoskeletal 28 [Homo sapiens]	3.44828	2	2	2	464	50.5	5.47	5.4	2		NP_853513.2
119395750	keratin, type II cytoskeletal 1 [Homo sapiens]	49.5342	27	34	26	644	66	8.12	152.18	27		NP_006112.3
119395754	keratin, type II cytoskeletal 5 [Homo sapiens]	3.72881	2	2	0	590	62.3	7.74	7	2		NP_000415.2
119703753	keratin, type II cytoskeletal 6B [Homo sapiens]	5.67376	3	3	0	564	60	8	11.3	3		NP_005546.2
131412225	keratin, type I cytoskeletal 13 isoform a [Homo sapiens]	4.14847	2	2	2	458	49.5	4.96	2.32	2		NP_705694.2
131412228	keratin, type I cytoskeletal 13 isoform b [Homo sapiens]	4.52381	2	2	2	420	45.8	4.88	2.32	2		NP_002265.2
134133226	POTE ankyrin domain family member E [Homo sapiens]	7.90698	7	10	3	1075	121.3	6.2	38.1	7		NP_001077007.1
148470406	heterogeneous nuclear ribonucleoprotein F [Homo sapiens]	7.46988	2	2	1	415	45.6	5.58	2.75	2		NP_001091676.1
148536853	coatomer subunit alpha isoform 2 [Homo sapiens]	6.78105	5	5	5	1224	138.3	7.66	19.25	5		NP_004362.2
148536855	coatomer subunit alpha isoform 1 [Homo sapiens]	6.73155	5	5	5	1233	139.2	7.59	19.25	5		NP_001091868.1
153791352	POTE ankyrin domain family member F [Homo sapiens]	5.76744	6	8	2	1075	121.4	6.2	26.99	6		NP_001093241.1
153792590	heat shock protein HSP 90-alpha isoform 1 [Homo sapiens]	7.02576	5	5	1	854	98.1	5.16	15.41	5		NP_001017963.2
154146191	heat shock protein HSP 90-alpha isoform 2 [Homo sapiens]	8.19672	5	5	1	732	84.6	5.02	15.41	5		NP_005339.3
155969697	keratin, type II cytoskeletal 6C [Homo sapiens]	3.90071	2	2	0	564	60	8	7	2		NP_775109.2
157412270	heterogeneous nuclear ribonucleoprotein M isoform b [Homo sapiens]	18.5239	9	10	9	691	73.6	8.82	39.4	9		NP_112480.2
190885499	cytochrome c oxidase subunit 5A, mitochondrial precursor [Homo sapiens]	21.3333	4	4	4	150	16.8	6.79	12.47	4		NP_004246.2
194239727	elongation factor 1-delta isoform 2 [Homo sapiens]	9.25267	2	2	2	281	31.1	5.01	8.57	2		NP_001123527.1
194239729	elongation factor 1-delta isoform 4 [Homo sapiens]	10.1167	2	2	2	257	28.5	4.92	8.57	2		NP_001123528.1
195972866	keratin, type I cytoskeletal 10 [Homo sapiens]	17.637	7	7	7	584	58.8	5.21	23.98	7		NP_000412.3
207028494	L-lactate dehydrogenase A chain isoform 2 [Homo sapiens]	18.9781	4	4	4	274	30.2	7.15	12.83	4		NP_001128711.1
209915581	60S ribosomal protein L28 isoform 1 [Homo sapiens]	17.1779	4	4	4	163	18.4	10.78	14.04	4		NP_001129606.1
209915584	60S ribosomal protein L28 isoform 3 [Homo sapiens]	16.568	4	4	4	169	19.1	10.83	14.04	4		NP_001129607.1
209915586	60S ribosomal protein L28 isoform 4 [Homo sapiens]	32.1839	4	4	4	87	10.1	10.67	14.04	4		NP_001129608.1
209915588	60S ribosomal protein L28 isoform 5 [Homo sapiens]	40.5797	4	4	4	69	7.9	10.7	14.04	4		NP_001129609.1
217272849	prolyl 4-hydroxylase subunit alpha-1 isoform 2 precursor [Homo sapiens]	17.603	9	9	9	534	61	6.01	29.95	9		NP_001136067.1
217272851	prolyl 4-hydroxylase subunit alpha-1 isoform 3 precursor [Homo sapiens]	21.5116	10	10	10	516	58.9	6.02	32.72	10		NP_001136068.1
222136639	C-1-tetrahydrofolate synthase, cytoplasmic [Homo sapiens]	2.45989	2	2	2	935	101.5	7.3	7.37	2		NP_005947.3
226246671	40S ribosomal protein S20 isoform 1 [Homo sapiens]	23.9437	3	3	3	142	16	9.32	7.61	3		NP_001139699.1
238624110	histone H2B type 2-F isoform b [Homo sapiens]	24.6269	3	5	3	134	14.8	10.35	17.3	3		NP_001154806.1
260099723	L-lactate dehydrogenase A chain isoform 3 [Homo sapiens]	18.2825	5	5	5	361	39.8	8.43	15.62	5		NP_001158886.1
261878575	guanine nucleotide-binding protein G(i) subunit alpha-2 isoform 2 [Homo sapiens]	12.5786	4	4	4	318	36.4	5.59	15.84	4		NP_001159897.1
301171345	tubulin alpha-8 chain isoform 2 [Homo sapiens]	11.7493	3	5	1	383	42.9	5.08	22.16	3		NP_001180343.1
304555581	elongation factor 1-delta isoform 1 [Homo sapiens]	4.01855	2	2	2	647	71.4	6.42	8.57	2		NP_115754.3
308235963	tubulin beta-3 chain isoform 2 [Homo sapiens]	8.20106	3	4	1	378	42.4	4.96	19.33	3		NP_001184110.1
315221152	60S ribosomal protein L11 isoform 2 [Homo sapiens]	16.9492	3	3	3	177	20.1	9.6	10.08	3		NP_001186731.1
315570273	actin, gamma-enteric smooth muscle isoform 2 precursor [Homo sapiens]	19.2192	6	7	0	333	37.1	5.54	21.96	6		NP_001186822.1
316659409	actin, cytoplasmic 2 [Homo sapiens]	54.4	17	28	7	375	41.8	5.48	92.36	17		NP_001186883.1
332164775	pyruvate kinase PKM isoform c [Homo sapiens]	4.95868	2	2	2	605	65.9	7.87	9.73	2		NP_001193725.1
332164777	pyruvate kinase PKM isoform d [Homo sapiens]	6.56455	2	2	2	457	49.9	7.83	9.73	2		NP_001193726.1
332164781	pyruvate kinase PKM isoform f [Homo sapiens]	5.59701	2	2	2	536	58.5	7.71	9.73	2		NP_001193728.1
342187211	fructose-bisphosphate aldolase A isoform 2 [Homo sapiens]	6.9378	2	2	2	418	45.2	8.25	2.36	2		NP_001230106.1
378404908	glyceraldehyde-3-phosphate dehydrogenase isoform 2 [Homo sapiens]	8.87372	2	3	2	293	31.5	7.61	5.39	2		NP_001243728.1
378548190	40S ribosomal protein S3 isoform 1 [Homo sapiens]	10.6996	2	2	2	243	26.7	9.66	7.5	2		NP_001243731.1
381342476	heterogeneous nuclear ribonucleoprotein H [Homo sapiens]	5.79065	2	2	1	449	49.2	6.3	7.15	2		NP_001244222.1
382546007	ATP synthase subunit alpha, mitochondrial isoform b precursor [Homo sapiens]	26.9303	13	15	13	531	57.5	9.29	49.37	13		NP_001244263.1
386869503	40S ribosomal protein S3 isoform 2 [Homo sapiens]	10.0386	2	2	2	259	28.5	9.73	7.5	2		NP_001247435.1
386869506	40S ribosomal protein S3 isoform 3 [Homo sapiens]	22.2222	2	2	2	117	12.6	9.28	7.5	2		NP_001247436.1
392494079	lipoamide acyltransferase component of branched-chain alpha-keto acid dehydrogenase complex, mitochondrial precursor [Homo sapiens]	6.22407	2	2	2	482	53.5	8.51	6.37	2		NP_001909.3
393715091	tubulin alpha-1A chain isoform 1 [Homo sapiens]	21.7295	7	7	2	451	50.1	5.06	27.86	7		NP_001257328.1
393715095	tubulin alpha-1A chain isoform 2 [Homo sapiens]	23.5577	7	7	2	416	46.3	5.08	27.86	7		NP_001257329.1
395132436	60S ribosomal protein L18 isoform 2 [Homo sapiens]	25.1572	4	5	4	159	18.1	11.84	14.13	4		NP_001257419.1
431822401	heat shock protein HSP 90-beta isoform a [Homo sapiens]	8.56354	5	5	1	724	83.2	5.03	14.35	5		NP_001258898.1
431822406	heat shock protein HSP 90-beta isoform b [Homo sapiens]	5.47337	3	3	1	676	78.2	5.05	6.97	3		NP_001258900.1
431822408	heat shock protein HSP 90-beta isoform c [Homo sapiens]	8.68347	5	5	1	714	82.3	5.06	14.35	5		NP_001258901.1
459352730	POTE ankyrin domain family member J [Homo sapiens]	3.37187	4	5	2	1038	117.3	5.97	14.06	4		NP_001264012.1
475808427	POTE ankyrin domain family member I [Homo sapiens]	4.27907	5	6	2	1075	121.2	6.21	17.24	5		NP_001264335.1
499589572	neutral alpha-glucosidase AB isoform 4 [Homo sapiens]	5.6338	2	2	2	852	96.5	5.94	9.98	2		NP_001265121.1
499589599	neutral alpha-glucosidase AB isoform 5 [Homo sapiens]	5.78313	2	2	2	830	93.9	5.82	9.98	2		NP_001265122.1
499589768	neutral alpha-glucosidase AB isoform 6 [Homo sapiens]	5.66706	2	2	2	847	96.2	5.72	9.98	2		NP_001265123.1
530361961	PREDICTED: lipoamide acyltransferase component of branched-chain alpha-keto acid dehydrogenase complex, mitochondrial isoform X1 [Homo sapiens]	9.96678	2	2	2	301	33	8.84	6.37	2		XP_005270602.1
530370916	PREDICTED: tubulin alpha-4A chain isoform X1 [Homo sapiens]	18.0139	5	7	2	433	48.3	5.01	30.59	5		XP_005246889.1
530381854	PREDICTED: histone H2B type 1-D isoform X1 [Homo sapiens]	22	3	5	3	150	16.3	10.32	17.3	3		XP_005249096.1
530388819	PREDICTED: elongation factor 1-delta isoform X1 [Homo sapiens]	3.77907	2	2	2	688	75.6	6.43	8.57	2		XP_005250877.1
530405975	PREDICTED: pyruvate kinase PKM isoform X3 [Homo sapiens]	5.07614	2	2	2	591	64.5	8.02	9.73	2		XP_005254500.1
530412176	PREDICTED: keratin, type I cytoskeletal 10 isoform X1 [Homo sapiens]	16.5064	7	7	7	624	63.3	5.26	23.98	7		XP_005257400.1
530416988	PREDICTED: 60S ribosomal protein L28 isoform X1 [Homo sapiens]	16.4706	4	4	4	170	19.1	11.46	14.04	4		XP_005259189.1
530421753	PREDICTED: moesin isoform X2 [Homo sapiens]	3.46021	2	2	2	578	67.9	6.28	2.67	2		XP_005262326.1
530427501	PREDICTED: heterogeneous nuclear ribonucleoprotein M isoform X1 [Homo sapiens]	14.6853	8	8	8	715	76	8.7	28.04	8		XP_005272535.1
530427503	PREDICTED: heterogeneous nuclear ribonucleoprotein M isoform X2 [Homo sapiens]	14.4663	7	8	7	712	75.6	8.57	31.45	7		XP_005272536.1
530427505	PREDICTED: heterogeneous nuclear ribonucleoprotein M isoform X3 [Homo sapiens]	15.5325	8	8	8	676	72.1	8.82	28.04	8		XP_005272537.1
530427507	PREDICTED: heterogeneous nuclear ribonucleoprotein M isoform X4 [Homo sapiens]	20.9836	9	10	9	610	64.4	8.76	39.4	9		XP_005272538.1
530427511	PREDICTED: heterogeneous nuclear ribonucleoprotein M isoform X5 [Homo sapiens]	22.4168	9	10	9	571	60.5	8.92	39.4	9		XP_005272540.1
543173167	guanine nucleotide-binding protein G(I)/G(S)/G(T) subunit beta-1 isoform 2 [Homo sapiens]	19.1667	3	3	3	240	25.9	4.89	7.74	3		NP_001269467.1
543173169	guanine nucleotide-binding protein G(I)/G(S)/G(T) subunit beta-1 isoform 1 [Homo sapiens]	13.5294	3	3	3	340	37.4	6	7.74	3		NP_001269468.1
543583773	guanine nucleotide-binding protein G(i) subunit alpha-2 isoform 3 [Homo sapiens]	13.2013	4	4	4	303	34.9	5.38	15.84	4		NP_001269546.1
543583775	guanine nucleotide-binding protein G(i) subunit alpha-2 isoform 4 [Homo sapiens]	9.85401	3	3	3	274	31.5	5.44	11.03	3		NP_001269547.1
543583777	guanine nucleotide-binding protein G(i) subunit alpha-2 isoform 5 [Homo sapiens]	11.7994	4	4	4	339	38.4	5.48	15.84	4		NP_001269548.1
543583779	guanine nucleotide-binding protein G(i) subunit alpha-2 isoform 6 [Homo sapiens]	11.7994	4	4	4	339	38.7	5.86	15.84	4		NP_001269549.1
574584803	tubulin beta-4A chain isoform 1 [Homo sapiens]	18.9899	5	6	4	495	54.4	5.02	32.94	5		NP_001276052.1
574584811	tubulin beta-4A chain isoform 2 [Homo sapiens]	19.2229	5	6	4	489	53.8	4.98	32.94	5		NP_001276056.1
574584818	tubulin beta-4A chain isoform 4 [Homo sapiens]	21.2366	4	5	3	372	41.6	4.94	29.58	4		NP_001276059.1
578798587	PREDICTED: alpha-enolase isoform X1 [Homo sapiens]	6.45161	2	2	2	434	47.3	6.99	9.54	2		XP_006710496.1
578800966	PREDICTED: histone H2B type 2-F isoform X1 [Homo sapiens]	22.449	3	5	3	147	16.1	9.96	17.3	3		XP_006711398.1
578800968	PREDICTED: histone H2B type 2-F isoform X2 [Homo sapiens]	25.7812	3	5	3	128	14.2	10.29	17.3	3		XP_006711399.1
578811108	PREDICTED: heterogeneous nuclear ribonucleoprotein H isoform X3 [Homo sapiens]	5.75221	2	2	1	452	49.1	6.92	7.15	2		XP_006714925.1
578811110	PREDICTED: heterogeneous nuclear ribonucleoprotein H isoform X4 [Homo sapiens]	6.06061	2	2	1	429	47.1	6.34	7.15	2		XP_006714926.1
578813594	PREDICTED: actin, cytoplasmic 1 isoform X1 [Homo sapiens]	51.7787	10	12	6	253	28.2	5.34	37.18	10		XP_006715827.1
578815687	PREDICTED: 60S ribosomal protein L7 isoform X1 [Homo sapiens]	11.0577	2	2	2	208	24.4	10.67	6.21	2		XP_006716526.1
578815872	PREDICTED: elongation factor 1-delta isoform X4 [Homo sapiens]	4.01855	2	2	2	647	71.4	6.42	8.57	2		XP_006716586.1
578822176	PREDICTED: acetyl-CoA acetyltransferase, mitochondrial isoform X1 [Homo sapiens]	10.089	2	2	1	337	35.5	7.37	9.25	2		XP_006718897.1
578827087	PREDICTED: pyruvate kinase PKM isoform X2 [Homo sapiens]	4.95868	2	2	2	605	65.8	7.99	9.73	2		XP_006720633.1
578836330	PREDICTED: histone H2B type F-S-like [Homo sapiens]	26.1905	3	5	3	126	13.9	10.37	17.3	3		XP_006723981.1
578839678	PREDICTED: elongation factor 1-delta isoform X2 [Homo sapiens]	3.78457	2	2	2	687	75.5	6.43	8.57	2		XP_006725128.1
578839680	PREDICTED: elongation factor 1-delta isoform X3 [Homo sapiens]	3.91566	2	2	2	664	73	6.34	8.57	2		XP_006725129.1
578846900	PREDICTED: histone H2B type F-S-like [Homo sapiens]	26.1905	3	5	3	126	13.9	10.32	17.3	3		XP_006726868.1
583966148	isocitrate dehydrogenase [NADP], mitochondrial isoform 2 [Homo sapiens]	9.5	4	4	4	400	45.2	7.75	7.62	4		NP_001276839.1
588282794	isocitrate dehydrogenase [NADP], mitochondrial isoform 3 [Homo sapiens]	9.62733	3	3	3	322	36.1	8.38	5.71	3		NP_001277043.1
645912968	tubulin beta chain isoform a [Homo sapiens]	35.7759	10	12	0	464	52	4.96	62.42	10		NP_001280141.1
645912972	tubulin beta chain isoform c [Homo sapiens]	49.5868	7	9	3	242	27.3	4.5	49.08	7		NP_001280142.1
645912975	tubulin beta chain isoform d [Homo sapiens]	34.75	9	11	0	400	44.8	4.98	58.61	9		NP_001280143.1
645912980	tubulin beta chain isoform e [Homo sapiens]	37.3656	9	11	0	372	41.7	4.91	58.61	9		NP_001280144.1
661902998	heterogeneous nuclear ribonucleoprotein M isoform c [Homo sapiens]	17.6471	8	8	8	595	63	8.78	28.04	8		NP_001284347.1
665821274	peptidyl-prolyl cis-trans isomerase A isoform 2 [Homo sapiens]	35.2381	3	3	3	105	11.4	7.9	10.35	3		NP_001287910.1
733605064	tubulin alpha-1C chain isoform b [Homo sapiens]	22.9469	7	9	1	414	46	5.12	35.62	7		NP_001290045.1
733605926	tubulin alpha-1C chain isoform a [Homo sapiens]	18.3044	7	9	1	519	57.7	5.07	35.62	7		NP_001290043.1
767918223	PREDICTED: POTE ankyrin domain family member E isoform X1 [Homo sapiens]	8.88192	7	10	3	957	107.7	6.68	38.1	7		XP_011509518.1
767918225	PREDICTED: POTE ankyrin domain family member E isoform X2 [Homo sapiens]	9.1104	7	10	3	933	105	6.39	38.1	7		XP_011509519.1
767919342	PREDICTED: POTE ankyrin domain family member I isoform X1 [Homo sapiens]	4.23963	5	6	2	1085	122.4	6.2	17.24	5		XP_011509972.1
767919377	PREDICTED: POTE ankyrin domain family member J isoform X1 [Homo sapiens]	3.33969	4	5	2	1048	118.5	5.96	14.06	4		XP_011509985.1
767919570	PREDICTED: POTE ankyrin domain family member F isoform X2 [Homo sapiens]	5.89914	6	8	2	1051	118.7	5.95	26.99	6		XP_011510064.1
767938358	PREDICTED: heterogeneous nuclear ribonucleoprotein H isoform X1 [Homo sapiens]	5.50847	2	2	1	472	51.2	6.8	7.15	2		XP_011532848.1
767938360	PREDICTED: heterogeneous nuclear ribonucleoprotein H isoform X2 [Homo sapiens]	5.62771	2	2	1	462	50.2	6.8	7.15	2		XP_011532849.1
767939943	PREDICTED: tubulin beta-2B chain isoform X1 [Homo sapiens]	21.7158	6	8	1	373	41.9	4.91	41.74	6		XP_011512873.1
767942082	PREDICTED: elongation factor 1-alpha 1 isoform X1 [Homo sapiens]	16.6667	7	9	7	462	50.1	9.01	27.27	7		XP_011533816.1
767948171	PREDICTED: MICOS complex subunit MIC19 isoform X1 [Homo sapiens]	16.3793	3	3	3	232	26.7	7.75	9.26	3		XP_011514665.1
767960019	PREDICTED: tubulin beta-8 chain isoform X1 [Homo sapiens]	10.7527	2	2	1	372	41.8	4.87	9.7	2		XP_011517761.1
767960085	PREDICTED: ATP synthase subunit gamma, mitochondrial isoform X1 [Homo sapiens]	19.9203	4	4	4	251	27.6	6.81	10.22	4		XP_011517792.1
767970091	PREDICTED: heat shock cognate 71 kDa protein isoform X1 [Homo sapiens]	25.0774	14	14	13	646	70.9	5.52	47.35	14		XP_011541100.1
767980445	PREDICTED: heat shock protein HSP 90-alpha isoform X1 [Homo sapiens]	7.034	5	5	1	853	98	5.16	15.41	5		XP_011535020.1
767984412	PREDICTED: pyruvate kinase PKM isoform X4 [Homo sapiens]	5.30035	2	2	2	566	61.4	7.81	9.73	2		XP_011519972.1
767984414	PREDICTED: pyruvate kinase PKM isoform X5 [Homo sapiens]	5.30035	2	2	2	566	61.6	7.68	9.73	2		XP_011519973.1
767984416	PREDICTED: pyruvate kinase PKM isoform X6 [Homo sapiens]	5.43478	2	2	2	552	60.2	7.84	9.73	2		XP_011519974.1
767984418	PREDICTED: pyruvate kinase PKM isoform X7 [Homo sapiens]	5.43478	2	2	2	552	60.3	7.69	9.73	2		XP_011519975.1
767988216	PREDICTED: coronin-1A isoform X1 [Homo sapiens]	19.0889	8	8	8	461	51	6.68	30.08	8		XP_011544016.1
767988754	PREDICTED: elongation factor Tu, mitochondrial isoform X1 [Homo sapiens]	7.96253	2	2	2	427	46.8	7.39	7.27	2		XP_011544230.1
768000519	PREDICTED: ATP-dependent RNA helicase DDX39A isoform X1 [Homo sapiens]	12.4122	4	4	4	427	49.1	5.68	17.79	4		XP_011525922.1
768000524	PREDICTED: ATP-dependent RNA helicase DDX39A isoform X2 [Homo sapiens]	23.8739	4	4	4	222	26.1	5.97	17.79	4		XP_011525923.1
768000711	PREDICTED: coatomer subunit epsilon isoform X1 [Homo sapiens]	17.8248	3	3	3	331	36.9	5.16	13.53	3		XP_011525957.1
768000715	PREDICTED: coatomer subunit epsilon isoform X2 [Homo sapiens]	16.129	2	2	2	279	31.2	5.31	9.63	2		XP_011525958.1
768037765	PREDICTED: moesin isoform X1 [Homo sapiens]	3.27869	2	2	2	610	71.3	6.06	2.67	2		XP_011529261.1
768037772	PREDICTED: moesin isoform X3 [Homo sapiens]	3.53357	2	2	2	566	66.6	6.16	2.67	2		XP_011529262.1
768044336	PREDICTED: ribonuclease inhibitor isoform X1 [Homo sapiens]	8.02603	2	2	2	461	49.9	4.82	8.2	2		XP_011544908.1

## Sheet: U1_CBD_TNE50
Accession	Description	Coverage	# Peptides	# PSMs	# Unique Peptides	# AAs	MW [kDa]	calc. pI	Score A Sequest HT	# Peptides A Sequest HT		Protein Accession
4501881	actin, alpha skeletal muscle [Homo sapiens]	24.9337	10	17	1	377	42	5.39	52.39	10		NP_001091.1
4501883	actin, aortic smooth muscle [Homo sapiens]	22.0159	9	16	1	377	42	5.39	48.19	9		NP_001604.1
4501885	actin, cytoplasmic 1 [Homo sapiens]	47.2	16	22	7	375	41.7	5.48	70.32	16		NP_001092.1
4501889	actin, gamma-enteric smooth muscle isoform 1 precursor [Homo sapiens]	22.0745	9	16	1	376	41.9	5.48	48.19	9		NP_001606.1
4502027	serum albumin preproprotein [Homo sapiens]	4.7619	3	3	3	609	69.3	6.28	9.4	3		NP_000468.1
4502303	ATP synthase subunit O, mitochondrial precursor [Homo sapiens]	58.6854	11	13	11	213	23.3	9.96	47.69	11		NP_001688.1
4503149	cathepsin G preproprotein [Homo sapiens]	10.5882	2	2	2	255	28.8	11.19	5.98	2		NP_001902.1
4503475	elongation factor 1-alpha 2 [Homo sapiens]	12.311	5	7	5	463	50.4	9.03	23.9	5		NP_001949.1
4503507	eukaryotic translation initiation factor 2 subunit 3 [Homo sapiens]	5.29661	2	2	2	472	51.1	8.4	2.93	2		NP_001406.1
4503571	alpha-enolase isoform 1 [Homo sapiens]	8.29493	3	3	3	434	47.1	7.39	11.52	3		NP_001419.1
4504041	guanine nucleotide-binding protein G(i) subunit alpha-2 isoform 1 [Homo sapiens]	7.32394	2	2	2	355	40.4	5.54	5.5	2		NP_002061.1
4504151	granulins precursor [Homo sapiens]	11.1298	5	6	5	593	63.5	6.83	21.24	5		NP_002078.1
4504245	histone H2A type 1-C [Homo sapiens]	32.3077	4	5	2	130	14.1	11.05	17.36	4		NP_003503.1
4504249	histone H2A type 1 [Homo sapiens]	35.3846	5	6	3	130	14.1	10.9	21.1	5		NP_003505.1
4504253	histone H2AX [Homo sapiens]	16.0839	3	3	1	143	15.1	10.74	8.83	3		NP_002096.1
4504255	histone H2A.Z [Homo sapiens]	31.25	4	4	2	128	13.5	10.58	10.89	4		NP_002097.1
4504259	histone H2B type 1-L [Homo sapiens]	23.0159	3	5	3	126	13.9	10.32	17.7	3		NP_003510.1
4504261	histone H2B type 1-N [Homo sapiens]	23.0159	3	5	3	126	13.9	10.32	17.7	3		NP_003511.1
4504263	histone H2B type 1-M [Homo sapiens]	23.0159	3	5	3	126	14	10.32	17.7	3		NP_003512.1
4504269	histone H2B type 1-H [Homo sapiens]	23.0159	3	5	3	126	13.9	10.32	17.7	3		NP_003515.1
4504277	histone H2B type 2-E [Homo sapiens]	23.0159	3	5	3	126	13.9	10.32	17.7	3		NP_003519.1
4504281	histone H3.1 [Homo sapiens]	33.8235	3	4	1	136	15.4	11.12	13.36	3		NP_003520.1
4504299	histone H3.1t [Homo sapiens]	10.2941	2	3	0	136	15.5	11.12	6.65	2		NP_003484.1
4504323	histone H4 [Homo sapiens]	51.4563	6	6	6	103	11.4	11.36	16.86	6		NP_003539.1
4504347	hemoglobin subunit alpha [Homo sapiens]	16.9014	2	3	2	142	15.2	8.68	11.57	2		NP_000549.1
4504445	heterogeneous nuclear ribonucleoprotein A1 isoform a [Homo sapiens]	9.6875	2	2	2	320	34.2	9.23	5.68	2		NP_002127.1
4504447	heterogeneous nuclear ribonucleoproteins A2/B1 isoform A2 [Homo sapiens]	12.61	3	3	3	341	36	8.65	11.23	3		NP_002128.1
4504505	peroxisomal multifunctional enzyme type 2 isoform 2 [Homo sapiens]	3.94022	2	2	2	736	79.6	8.84	7.48	2		NP_000405.1
4504511	dnaJ homolog subfamily A member 1 [Homo sapiens]	5.28967	2	2	2	397	44.8	7.08	6.13	2		NP_001530.1
4504981	galectin-1 [Homo sapiens]	62.963	7	9	7	135	14.7	5.5	38.85	7		NP_002296.1
4505257	moesin [Homo sapiens]	3.4662	3	3	3	577	67.8	6.4	5.12	3		NP_002435.1
4505753	phosphoglycerate mutase 1 [Homo sapiens]	14.9606	3	3	3	254	28.8	7.18	6.47	3		NP_002620.1
4505763	phosphoglycerate kinase 1 [Homo sapiens]	17.0264	5	5	5	417	44.6	8.1	20.51	5		NP_000282.1
4505881	plasminogen isoform 1 precursor [Homo sapiens]	7.40741	5	14	5	810	90.5	7.24	56.1	5		NP_000292.1
4506381	ras-related C3 botulinum toxin substrate 2 [Homo sapiens]	16.6667	3	3	3	192	21.4	7.61	9.11	3		NP_002863.1
4506597	60S ribosomal protein L12 [Homo sapiens]	19.3939	2	2	2	165	17.8	9.42	8	2		NP_000967.1
4506605	60S ribosomal protein L23 [Homo sapiens]	18.5714	4	4	4	140	14.9	10.51	11.19	4		NP_000969.1
4506607	60S ribosomal protein L18 isoform 1 [Homo sapiens]	21.2766	4	7	4	188	21.6	11.72	26.44	4		NP_000970.1
4506625	60S ribosomal protein L27a [Homo sapiens]	8.78378	2	2	2	148	16.6	11	6.45	2		NP_000981.1
4506631	60S ribosomal protein L30 [Homo sapiens]	18.2609	2	2	2	115	12.8	9.63	6.33	2		NP_000980.1
4506643	60S ribosomal protein L37a [Homo sapiens]	28.2609	2	2	2	92	10.3	10.43	5.06	2		NP_000989.1
4506649	60S ribosomal protein L3 isoform a [Homo sapiens]	14.1439	6	6	6	403	46.1	10.18	10.85	6		NP_000958.1
4506661	60S ribosomal protein L7a [Homo sapiens]	22.5564	4	4	4	266	30	10.61	12.34	4		NP_000963.1
4506663	60S ribosomal protein L8 [Homo sapiens]	15.1751	3	4	3	257	28	11.03	11.01	3		NP_000964.1
4506671	60S acidic ribosomal protein P2 [Homo sapiens]	78.2609	7	9	7	115	11.7	4.54	41.1	7		NP_000995.1
4506681	40S ribosomal protein S11 [Homo sapiens]	36.0759	5	5	5	158	18.4	10.3	11.55	5		NP_001006.1
4506691	40S ribosomal protein S16 [Homo sapiens]	23.2877	3	3	3	146	16.4	10.21	8.98	3		NP_001011.1
4506695	40S ribosomal protein S19 [Homo sapiens]	26.2069	4	4	4	145	16.1	10.32	13.46	4		NP_001013.1
4506697	40S ribosomal protein S20 isoform 2 [Homo sapiens]	25.2101	3	3	3	119	13.4	9.94	9.12	3		NP_001014.1
4506701	40S ribosomal protein S23 [Homo sapiens]	16.0839	2	2	2	143	15.8	10.49	5.37	2		NP_001016.1
4506703	40S ribosomal protein S24 isoform c [Homo sapiens]	17.2932	2	2	2	133	15.4	10.78	6.37	2		NP_001017.1
4506707	40S ribosomal protein S25 [Homo sapiens]	12.8	2	2	2	125	13.7	10.11	5.23	2		NP_001019.1
4506711	40S ribosomal protein S27 [Homo sapiens]	25	2	2	2	84	9.5	9.45	5.31	2		NP_001021.1
4506723	40S ribosomal protein S3a isoform 1 [Homo sapiens]	31.8182	8	11	8	264	29.9	9.73	26.65	8		NP_000997.1
4506725	40S ribosomal protein S4, X isoform X isoform [Homo sapiens]	34.2205	10	11	10	263	29.6	10.15	34.51	10		NP_000998.1
4506727	40S ribosomal protein S4, Y isoform 1 [Homo sapiens]	12.9278	5	5	5	263	29.4	10.24	12.44	5		NP_000999.1
4506741	40S ribosomal protein S7 [Homo sapiens]	14.9485	4	4	4	194	22.1	10.1	11.74	4		NP_001002.1
4506901	serine/arginine-rich splicing factor 3 [Homo sapiens]	23.1707	2	2	2	164	19.3	11.65	0	2		NP_003008.1
4507217	signal recognition particle 9 kDa protein isoform 2 [Homo sapiens]	34.8837	3	3	3	86	10.1	7.97	9.05	3		NP_003124.1
4507525	translocation protein SEC62 [Homo sapiens]	4.26065	2	2	2	399	45.8	7.12	4.95	2		NP_003253.1
4507729	tubulin beta-2A chain [Homo sapiens]	24.7191	7	8	1	445	49.9	4.89	34.23	7		NP_001060.1
4507879	voltage-dependent anion-selective channel protein 1 [Homo sapiens]	33.9223	8	9	7	283	30.8	8.54	31.21	8		NP_003365.1
4507949	14-3-3 protein beta/alpha [Homo sapiens]	9.7561	2	2	2	246	28.1	4.83	6.31	2		NP_003395.1
4557014	catalase [Homo sapiens]	7.21063	4	4	4	527	59.7	7.39	16.46	4		NP_001743.1
4557237	acetyl-CoA acetyltransferase, mitochondrial precursor [Homo sapiens]	9.60187	3	3	2	427	45.2	8.85	11	3		NP_000010.1
4557305	fructose-bisphosphate aldolase A isoform 1 [Homo sapiens]	6.04396	3	3	3	364	39.4	8.09	5.09	3		NP_000025.1
4557894	lysozyme C precursor [Homo sapiens]	60.8108	9	11	9	148	16.5	9.16	30.82	9		NP_000230.1
4757900	calreticulin precursor [Homo sapiens]	11.271	4	4	4	417	48.1	4.44	16.74	4		NP_004334.1
4758112	spliceosome RNA helicase DDX39B [Homo sapiens]	5.60748	2	2	2	428	49	5.67	7.58	2		NP_004631.1
4758256	eukaryotic translation initiation factor 2 subunit 1 [Homo sapiens]	7.30159	2	2	2	315	36.1	5.08	6.37	2		NP_004085.1
4759098	transformer-2 protein homolog beta isoform 1 [Homo sapiens]	8.68056	2	2	2	288	33.6	11.25	9.32	2		NP_004584.1
4826898	profilin-1 [Homo sapiens]	70	9	12	9	140	15	8.27	39.85	9		NP_005013.1
4826988	60S ribosomal protein L3-like [Homo sapiens]	2.9484	2	2	2	407	46.3	10.45	5.05	2		NP_005052.1
4885049	actin, alpha cardiac muscle 1 proprotein [Homo sapiens]	24.9337	10	17	1	377	42	5.39	52.39	10		NP_005150.1
4885079	ATP synthase subunit gamma, mitochondrial isoform H (heart) precursor [Homo sapiens]	12.4579	3	3	3	297	32.9	9.31	8.05	3		NP_005165.1
4885375	histone H1.2 [Homo sapiens]	11.7371	2	2	2	213	21.4	10.93	7.89	2		NP_005310.1
4885377	histone H1.3 [Homo sapiens]	11.3122	2	2	2	221	22.3	11.02	7.89	2		NP_005311.1
4885379	histone H1.4 [Homo sapiens]	11.4155	2	2	2	219	21.9	11.03	7.89	2		NP_005312.1
4885385	histone H3.3 [Homo sapiens]	10.2941	2	3	0	136	15.3	11.27	6.65	2		NP_005315.1
5031635	cofilin-1 [Homo sapiens]	27.7108	3	3	3	166	18.5	8.09	11.81	3		NP_005498.1
5031741	dnaJ homolog subfamily A member 2 [Homo sapiens]	15.7767	4	4	4	412	45.7	6.48	15.83	4		NP_005871.1
5031755	heterogeneous nuclear ribonucleoprotein R isoform 2 [Homo sapiens]	4.2654	3	3	1	633	70.9	8.13	8.21	3		NP_005817.1
5031815	lysine--tRNA ligase isoform 2 [Homo sapiens]	2.51256	2	2	2	597	68	6.35	5.3	2		NP_005539.1
5031857	L-lactate dehydrogenase A chain isoform 1 [Homo sapiens]	7.22892	2	2	2	332	36.7	8.27	5.44	2		NP_005557.1
5032051	40S ribosomal protein S14 [Homo sapiens]	18.543	3	3	3	151	16.3	10.05	8.52	3		NP_005608.1
5174735	tubulin beta-4B chain [Homo sapiens]	26.0674	8	9	1	445	49.8	4.89	37.06	8		NP_006079.1
5453559	ATP synthase subunit d, mitochondrial isoform a [Homo sapiens]	29.8137	3	4	3	161	18.5	5.3	9.17	3		NP_006347.1
5902076	serine/arginine-rich splicing factor 1 isoform 1 [Homo sapiens]	12.0968	3	3	3	248	27.7	10.36	7.48	3		NP_008855.1
6912616	histone H2A.V isoform 1 [Homo sapiens]	31.25	4	4	2	128	13.5	10.58	10.89	4		NP_036544.1
7669492	glyceraldehyde-3-phosphate dehydrogenase isoform 1 [Homo sapiens]	25.9701	7	8	7	335	36	8.46	23.35	7		NP_002037.2
8923390	MICOS complex subunit MIC19 [Homo sapiens]	16.7401	3	4	3	227	26.1	8.28	9.24	3		NP_060282.1
8923898	E3 ubiquitin-protein ligase RNF114 [Homo sapiens]	12.7193	2	2	2	228	25.7	7.25	7.28	2		NP_061153.1
8923920	core histone macro-H2A.2 [Homo sapiens]	10.2151	2	2	2	372	40	9.69	2.7	2		NP_061119.1
9507215	tubulin alpha-8 chain isoform 1 [Homo sapiens]	8.68597	3	3	0	449	50.1	5.06	7.12	3		NP_061816.1
10800130	histone H2A type 1-D [Homo sapiens]	35.3846	5	6	3	130	14.1	10.9	21.1	5		NP_066409.1
10800140	histone H2B type 1-B [Homo sapiens]	23.0159	3	5	3	126	13.9	10.32	17.7	3		NP_066406.1
10800144	histone cluster 1, H2aj [Homo sapiens]	35.9375	5	6	3	128	13.9	10.89	21.1	5		NP_066544.1
10863927	peptidyl-prolyl cis-trans isomerase A isoform 1 [Homo sapiens]	56.9697	6	10	6	165	18	7.81	39.34	6		NP_066953.1
11415026	60S ribosomal protein L18a [Homo sapiens]	24.4318	6	7	6	176	20.7	10.71	17.64	6		NP_000971.1
11596859	39S ribosomal protein L17, mitochondrial [Homo sapiens]	14.8571	2	2	2	175	20	10.11	3.32	2		NP_071344.1
11968182	40S ribosomal protein S18 [Homo sapiens]	30.2632	10	15	10	152	17.7	10.99	37.88	10		NP_072045.1
13376181	tubulin alpha chain-like 3 isoform 1 [Homo sapiens]	4.4843	2	2	0	446	49.9	6.05	5	2		NP_079079.1
13676857	heat shock-related 70 kDa protein 2 [Homo sapiens]	5.47731	3	3	2	639	70	5.74	6.06	3		NP_068814.2
13904866	60S ribosomal protein L28 isoform 2 [Homo sapiens]	29.927	6	7	6	137	15.7	12.02	20.97	6		NP_000982.2
13904870	40S ribosomal protein S5 [Homo sapiens]	16.1765	4	5	4	204	22.9	9.72	15.53	4		NP_001000.2
14110414	heterogeneous nuclear ribonucleoprotein D0 isoform c [Homo sapiens]	7.84314	2	2	2	306	32.8	8.16	7.42	2		NP_002129.2
14110417	heterogeneous nuclear ribonucleoprotein D0 isoform b [Homo sapiens]	7.14286	2	2	2	336	36.2	8.1	7.42	2		NP_112737.1
14110420	heterogeneous nuclear ribonucleoprotein D0 isoform a [Homo sapiens]	6.76056	2	2	2	355	38.4	7.81	7.42	2		NP_112738.1
14141152	heterogeneous nuclear ribonucleoprotein M isoform a [Homo sapiens]	20.6849	12	14	12	730	77.5	8.7	45.83	12		NP_005959.2
14141161	heterogeneous nuclear ribonucleoprotein U isoform b [Homo sapiens]	8.43672	6	6	6	806	88.9	5.78	18.93	6		NP_004492.2
14277700	40S ribosomal protein S12 [Homo sapiens]	11.3636	2	2	2	132	14.5	7.21	7.16	2		NP_001007.2
14389309	tubulin alpha-1C chain isoform c [Homo sapiens]	19.5991	6	6	1	449	49.9	5.1	16.97	6		NP_116093.1
14916501	40S ribosomal protein S24 isoform a [Homo sapiens]	17.6923	2	2	2	130	15.1	10.89	6.37	2		NP_148982.1
15055539	40S ribosomal protein S2 [Homo sapiens]	11.2628	3	3	3	293	31.3	10.24	7.72	3		NP_002943.2
15431288	60S ribosomal protein L10a [Homo sapiens]	7.37327	2	2	2	217	24.8	9.94	4.89	2		NP_009035.3
15431290	60S ribosomal protein L11 isoform 1 [Homo sapiens]	17.9775	3	5	3	178	20.2	9.6	16.29	3		NP_000966.2
15431293	60S ribosomal protein L15 isoform 1 [Homo sapiens]	22.549	4	4	4	204	24.1	11.62	11.71	4		NP_002939.2
15431301	60S ribosomal protein L7 [Homo sapiens]	22.1774	5	5	5	248	29.2	10.65	16.68	5		NP_000962.2
15617199	histone H2A type 3 [Homo sapiens]	32.3077	4	5	2	130	14.1	11.05	17.36	4		NP_254280.1
16306566	histone H2B type 1-O [Homo sapiens]	23.0159	3	5	3	126	13.9	10.32	17.7	3		NP_003518.2
16507237	78 kDa glucose-regulated protein precursor [Homo sapiens]	32.7217	20	21	19	654	72.3	5.16	79.78	20		NP_005338.1
16579885	60S ribosomal protein L4 [Homo sapiens]	14.5199	9	12	9	427	47.7	11.06	39.05	9		NP_000959.2
17158044	40S ribosomal protein S6 [Homo sapiens]	11.245	2	2	2	249	28.7	10.84	4.63	2		NP_001001.2
17921989	tubulin alpha-4A chain isoform 1 [Homo sapiens]	22.5446	7	7	2	448	49.9	5.06	22.64	7		NP_005991.1
17921993	tubulin alpha-3C/D chain [Homo sapiens]	14.4444	4	4	1	450	49.9	5.1	11.6	4		NP_005992.1
17978519	vacuolar protein sorting-associated protein 26A isoform 1 [Homo sapiens]	7.03364	2	2	2	327	38.1	6.57	5.81	2		NP_004887.2
17986258	myosin light polypeptide 6 isoform 1 [Homo sapiens]	17.8808	2	2	2	151	16.9	4.65	6.82	2		NP_066299.2
18105045	histone H2A type 1-H [Homo sapiens]	35.9375	5	6	3	128	13.9	10.89	21.1	5		NP_542163.1
18105048	histone H2B type 1-K [Homo sapiens]	23.0159	3	5	3	126	13.9	10.32	17.7	3		NP_542160.1
18152783	60S ribosomal protein L10-like [Homo sapiens]	22.4299	5	7	5	214	24.5	10.01	16.01	5		NP_542784.1
19557656	histone H2A type 1-B/E [Homo sapiens]	32.3077	4	5	2	130	14.1	11.05	17.36	4		NP_003504.2
20070125	protein disulfide-isomerase precursor [Homo sapiens]	14.1732	8	10	8	508	57.1	4.87	23.96	8		NP_000909.2
20336752	histone H2B type 1-D [Homo sapiens]	23.0159	3	5	3	126	13.9	10.32	17.7	3		NP_619790.1
20336754	histone H2B type 1-J [Homo sapiens]	23.0159	3	5	3	126	13.9	10.32	17.7	3		NP_066402.2
20357599	histone H2A.V isoform 2 [Homo sapiens]	22.807	3	3	1	114	12.1	10.46	8.76	3		NP_619541.1
21166389	histone H2B type 1-C/E/F/G/I [Homo sapiens]	23.0159	3	5	3	126	13.9	10.32	17.7	3		NP_003517.2
21361322	tubulin beta-4A chain isoform 3 [Homo sapiens]	13.7387	4	5	0	444	49.6	4.88	21.22	4		NP_006078.2
21361657	protein disulfide-isomerase A3 precursor [Homo sapiens]	16.0396	8	8	8	505	56.7	6.35	26.5	8		NP_005304.3
21464101	14-3-3 protein gamma [Homo sapiens]	9.7166	2	2	2	247	28.3	4.89	6.31	2		NP_036611.2
24234686	heat shock cognate 71 kDa protein isoform 2 [Homo sapiens]	21.501	7	8	6	493	53.5	5.86	27.5	7		NP_694881.1
24234688	stress-70 protein, mitochondrial precursor [Homo sapiens]	17.9676	8	8	8	679	73.6	6.16	34.39	8		NP_004125.3
24586679	histone H2B type 1-A [Homo sapiens]	11.0236	2	2	2	127	14.2	10.32	5.7	2		NP_733759.1
24638446	histone H2A type 2-C [Homo sapiens]	35.6589	5	6	3	129	14	10.9	21.1	5		NP_003508.1
25092737	histone H2A type 1-A [Homo sapiens]	17.5573	3	3	1	131	14.2	10.86	8.83	3		NP_734466.1
25188179	voltage-dependent anion-selective channel protein 3 isoform 1 [Homo sapiens]	5.65371	2	2	1	283	30.6	8.66	5.51	2		NP_005653.3
28173554	histone H2B type 3-B [Homo sapiens]	23.0159	3	5	3	126	13.9	10.32	17.7	3		NP_778225.1
28178832	isocitrate dehydrogenase [NADP], mitochondrial isoform 1 precursor [Homo sapiens]	14.6018	6	8	6	452	50.9	8.69	21.86	6		NP_002159.2
28195394	histone H2A type 2-B [Homo sapiens]	12.3077	2	2	1	130	14	10.89	5.98	2		NP_778235.1
29553970	histone H2A.J [Homo sapiens]	35.6589	5	6	3	129	14	10.9	21.1	5		NP_808760.1
29788768	tubulin beta-2B chain [Homo sapiens]	24.7191	7	8	1	445	49.9	4.89	34.23	7		NP_821080.1
29788785	tubulin beta chain isoform b [Homo sapiens]	33.7838	11	12	4	444	49.6	4.89	44.44	11		NP_821133.1
30581135	structural maintenance of chromosomes protein 1A isoform 1 [Homo sapiens]	2.43309	2	2	2	1233	143.1	7.64	4.95	2		NP_006297.2
31542319	coatomer subunit epsilon isoform a [Homo sapiens]	17.8571	4	4	4	308	34.5	5.12	12.07	4		NP_009194.2
33286418	pyruvate kinase PKM isoform a [Homo sapiens]	12.2411	4	5	4	531	57.9	7.84	24.02	4		NP_002645.3
33286422	pyruvate kinase PKM isoform b [Homo sapiens]	8.09793	3	4	3	531	58	7.71	18.59	3		NP_872271.1
34147513	ras-related protein Rab-7a [Homo sapiens]	12.0773	2	2	2	207	23.5	6.7	7.46	2		NP_004628.4
34147630	elongation factor Tu, mitochondrial precursor [Homo sapiens]	6.37363	2	2	2	455	49.8	7.61	6.58	2		NP_003312.3
34419635	heat shock 70 kDa protein 6 [Homo sapiens]	3.7325	2	2	1	643	71	6.14	3.48	2		NP_002146.2
38201710	probable ATP-dependent RNA helicase DDX17 isoform 1 [Homo sapiens]	5.62414	3	3	3	729	80.2	8.27	12.73	3		NP_006377.2
40805825	coatomer subunit epsilon isoform b [Homo sapiens]	21.4008	4	4	4	257	28.8	5.29	12.07	4		NP_955474.1
40805827	coatomer subunit epsilon isoform c [Homo sapiens]	21.4844	4	4	4	256	28.8	5.29	12.07	4		NP_955476.1
41281591	muscleblind-like protein 1 isoform a [Homo sapiens]	5.2356	2	2	2	382	41	8.75	6.06	2		NP_066368.2
41399285	60 kDa heat shock protein, mitochondrial [Homo sapiens]	13.9616	5	5	5	573	61	5.87	20.34	5		NP_955472.1
41406067	histone H2A.V isoform 3 [Homo sapiens]	30.3922	3	3	2	102	11	10.23	7.37	3		NP_958844.1
41406071	histone H2A.V isoform 5 [Homo sapiens]	34.4444	3	3	2	90	9.4	10.49	7.37	3		NP_958925.1
42544185	galectin-8 isoform a [Homo sapiens]	5.29248	2	2	2	359	40.4	9.01	6.14	2		NP_006490.3
42544191	galectin-8 isoform b [Homo sapiens]	5.99369	2	2	2	317	35.8	8.25	6.14	2		NP_963838.1
42558279	tubulin beta-8 chain [Homo sapiens]	3.82883	2	3	0	444	49.7	4.89	8.99	2		NP_817124.1
46409270	tubulin alpha-3E chain [Homo sapiens]	12	3	3	1	450	49.9	5.1	9.3	3		NP_997195.1
46411164	muscleblind-like protein 1 isoform b [Homo sapiens]	5.40541	2	2	2	370	39.8	8.81	6.06	2		NP_997175.1
46411168	muscleblind-like protein 1 isoform d [Homo sapiens]	6.62252	2	2	2	302	33	8.82	6.06	2		NP_997177.1
46411170	muscleblind-like protein 1 isoform e [Homo sapiens]	6.36943	2	2	2	314	34.2	8.76	6.06	2		NP_997178.1
46411172	muscleblind-like protein 1 isoform f [Homo sapiens]	5.88235	2	2	2	340	37	8.56	6.06	2		NP_997179.1
50345982	ATP synthase subunit alpha, mitochondrial isoform c [Homo sapiens]	26.839	12	14	12	503	54.5	8.24	45.49	12		NP_001001935.1
50345984	ATP synthase subunit alpha, mitochondrial isoform a precursor [Homo sapiens]	26.7631	13	15	13	553	59.7	9.13	48.71	13		NP_001001937.1
50345988	ATP synthase subunit gamma, mitochondrial isoform L (liver) precursor [Homo sapiens]	16.7785	4	4	4	298	33	9.22	12.84	4		NP_001001973.1
50592996	tubulin beta-3 chain isoform 1 [Homo sapiens]	13.3333	4	5	1	450	50.4	4.93	20.06	4		NP_006077.2
50593010	phosphoglycerate mutase 2 [Homo sapiens]	10.6719	2	2	2	253	28.7	8.88	3.6	2		NP_000281.2
51477708	heterogeneous nuclear ribonucleoprotein D0 isoform d [Homo sapiens]	8.36237	2	2	2	287	30.7	8.41	7.42	2		NP_001003810.1
51479152	ATP synthase subunit d, mitochondrial isoform b [Homo sapiens]	35.0365	3	4	3	137	15.8	7.18	9.17	3		NP_001003785.1
52632383	heterogeneous nuclear ribonucleoprotein L isoform a [Homo sapiens]	4.75382	2	2	2	589	64.1	8.22	6.11	2		NP_001524.2
52632385	heterogeneous nuclear ribonucleoprotein L isoform b [Homo sapiens]	6.14035	2	2	2	456	50.5	7.5	6.11	2		NP_001005335.1
53793688	histone H3.2 [Homo sapiens]	33.8235	3	4	1	136	15.4	11.27	14.24	3		NP_001005464.1
55956788	nucleolin [Homo sapiens]	7.1831	5	5	5	710	76.6	4.7	14.54	5		NP_005372.2
56676393	rho GDP-dissociation inhibitor 2 [Homo sapiens]	20.398	4	4	4	201	23	5.21	11.03	4		NP_001166.3
57013276	tubulin alpha-1B chain [Homo sapiens]	22.3947	7	7	2	451	50.1	5.06	22.64	7		NP_006073.2
58761500	obg-like ATPase 1 isoform 1 [Homo sapiens]	6.31313	2	2	2	396	44.7	7.81	6.37	2		NP_037473.3
63055057	beta-actin-like protein 2 [Homo sapiens]	18.617	7	12	0	376	42	5.59	33.84	7		NP_001017992.1
63252886	prolyl 4-hydroxylase subunit alpha-1 isoform 1 precursor [Homo sapiens]	12.3596	6	6	6	534	60.9	6.01	17.82	6		NP_000908.2
66912162	histone H2B type 2-F isoform a [Homo sapiens]	23.0159	3	5	3	126	13.9	10.32	17.7	3		NP_001019770.1
72534660	serine/arginine-rich splicing factor 7 isoform 1 [Homo sapiens]	11.7647	2	2	2	238	27.4	11.82	2.52	2		NP_001026854.1
74136883	heterogeneous nuclear ribonucleoprotein U isoform a [Homo sapiens]	8.24242	6	6	6	825	90.5	6	18.93	6		NP_114032.2
76496472	60S ribosomal protein L3 isoform b [Homo sapiens]	12.9944	5	5	5	354	40.1	10.23	10.85	5		NP_001029025.1
78000183	60S ribosomal protein L14 [Homo sapiens]	16.2791	3	5	3	215	23.4	10.93	15.86	3		NP_001030168.1
88703062	40S ribosomal protein S4, Y isoform 2 [Homo sapiens]	12.5475	5	6	5	263	29.3	10.08	14.76	5		NP_001034656.1
88999583	myosin light polypeptide 6 isoform 2 [Homo sapiens]	17.8808	2	2	2	151	17	4.55	6.82	2		NP_524147.2
106775678	histone H2A type 2-A [Homo sapiens]	35.3846	5	6	3	130	14.1	10.9	21.1	5		NP_001035807.1
109452591	succinyl-CoA ligase [ADP/GDP-forming] subunit alpha, mitochondrial precursor [Homo sapiens]	7.80347	2	2	2	346	36.2	8.79	5.58	2		NP_003840.2
117190174	heterogeneous nuclear ribonucleoproteins C1/C2 isoform b [Homo sapiens]	13.3106	3	3	3	293	32.3	5.08	10.4	3		NP_004491.2
118582269	serine/arginine-rich splicing factor 1 isoform 2 [Homo sapiens]	9.95025	2	2	2	201	22.4	7.94	4.94	2		NP_001071634.1
119395750	keratin, type II cytoskeletal 1 [Homo sapiens]	4.96894	2	2	2	644	66	8.12	10.43	2		NP_006112.3
124494254	proliferation-associated protein 2G4 [Homo sapiens]	11.4213	4	4	4	394	43.8	6.55	11.71	4		NP_006182.2
134133226	POTE ankyrin domain family member E [Homo sapiens]	4.74419	5	5	2	1075	121.3	6.2	17.72	5		NP_001077007.1
148536853	coatomer subunit alpha isoform 2 [Homo sapiens]	3.18627	2	2	2	1224	138.3	7.66	8	2		NP_004362.2
148536855	coatomer subunit alpha isoform 1 [Homo sapiens]	3.16302	2	2	2	1233	139.2	7.59	8	2		NP_001091868.1
148613856	probable ATP-dependent RNA helicase DDX17 isoform 3 [Homo sapiens]	5.60876	3	3	3	731	80.4	8.37	12.73	3		NP_001091974.1
149999611	signal recognition particle 14 kDa protein [Homo sapiens]	20.5882	4	4	4	136	14.6	10.04	9.05	4		NP_003125.3
153791352	POTE ankyrin domain family member F [Homo sapiens]	4.74419	5	5	2	1075	121.4	6.2	17.72	5		NP_001093241.1
153792590	heat shock protein HSP 90-alpha isoform 1 [Homo sapiens]	5.03513	3	3	2	854	98.1	5.16	11.86	3		NP_001017963.2
154146191	heat shock protein HSP 90-alpha isoform 2 [Homo sapiens]	5.87432	3	3	2	732	84.6	5.02	11.86	3		NP_005339.3
156071459	ADP/ATP translocase 2 [Homo sapiens]	5.7047	2	2	2	298	32.8	9.69	5.24	2		NP_001143.2
156071462	ADP/ATP translocase 3 [Homo sapiens]	10.0671	3	3	3	298	32.8	9.74	9.96	3		NP_001627.2
156151392	heterogeneous nuclear ribonucleoprotein R isoform 4 [Homo sapiens]	5.07519	3	3	1	532	59.6	9.16	8.21	3		NP_001095867.1
156151394	heterogeneous nuclear ribonucleoprotein R isoform 1 [Homo sapiens]	4.24528	3	3	1	636	71.2	8.13	8.21	3		NP_001095868.1
156151396	heterogeneous nuclear ribonucleoprotein R isoform 3 [Homo sapiens]	5.04673	3	3	1	535	59.9	9.16	8.21	3		NP_001095869.1
157412270	heterogeneous nuclear ribonucleoprotein M isoform b [Homo sapiens]	21.8524	12	14	12	691	73.6	8.82	45.83	12		NP_112480.2
167466173	heat shock 70 kDa protein 1A/1B [Homo sapiens]	3.43214	2	2	1	641	70	5.66	6.78	2		NP_005337.2
190885499	cytochrome c oxidase subunit 5A, mitochondrial precursor [Homo sapiens]	21.3333	3	3	3	150	16.8	6.79	9.66	3		NP_004246.2
194239727	elongation factor 1-delta isoform 2 [Homo sapiens]	22.0641	4	4	1	281	31.1	5.01	16.49	4		NP_001123527.1
194239729	elongation factor 1-delta isoform 4 [Homo sapiens]	22.9572	4	4	1	257	28.5	4.92	15.54	4		NP_001123528.1
194272210	lysine--tRNA ligase isoform 1 [Homo sapiens]	2.4	2	2	2	625	71.5	6.81	5.3	2		NP_001123561.1
194363758	signal recognition particle 9 kDa protein isoform 1 [Homo sapiens]	23.1707	2	2	2	82	9.1	7.8	5.01	2		NP_001123912.1
195972866	keratin, type I cytoskeletal 10 [Homo sapiens]	5.30822	3	3	3	584	58.8	5.21	9.84	3		NP_000412.3
208879465	voltage-dependent anion-selective channel protein 3 isoform 2 [Homo sapiens]	5.6338	2	2	1	284	30.8	8.66	5.51	2		NP_001129166.1
209915581	60S ribosomal protein L28 isoform 1 [Homo sapiens]	25.1534	6	7	6	163	18.4	10.78	20.97	6		NP_001129606.1
209915584	60S ribosomal protein L28 isoform 3 [Homo sapiens]	24.2604	6	7	6	169	19.1	10.83	20.97	6		NP_001129607.1
209915586	60S ribosomal protein L28 isoform 4 [Homo sapiens]	47.1264	6	7	6	87	10.1	10.67	20.97	6		NP_001129608.1
209915588	60S ribosomal protein L28 isoform 5 [Homo sapiens]	59.4203	6	7	6	69	7.9	10.7	20.97	6		NP_001129609.1
214010222	40S ribosomal protein S24 isoform e [Homo sapiens]	17.4242	2	2	2	132	15.3	10.92	6.37	2		NP_001135755.1
214010224	40S ribosomal protein S24 isoform b [Homo sapiens]	17.5573	2	2	2	131	15.2	10.9	6.37	2		NP_001135754.1
214010226	40S ribosomal protein S24 isoform d [Homo sapiens]	7.95848	2	2	2	289	32.4	10.15	6.37	2		NP_001135757.1
217272849	prolyl 4-hydroxylase subunit alpha-1 isoform 2 precursor [Homo sapiens]	12.3596	6	6	6	534	61	6.01	17.82	6		NP_001136067.1
217272851	prolyl 4-hydroxylase subunit alpha-1 isoform 3 precursor [Homo sapiens]	12.7907	6	6	6	516	58.9	6.02	17.82	6		NP_001136068.1
222352151	poly(rC)-binding protein 1 [Homo sapiens]	15.1685	4	4	4	356	37.5	7.09	14.39	4		NP_006187.2
226246671	40S ribosomal protein S20 isoform 1 [Homo sapiens]	21.1268	3	3	3	142	16	9.32	9.12	3		NP_001139699.1
228008291	heterogeneous nuclear ribonucleoprotein Q isoform 1 [Homo sapiens]	4.33387	3	3	1	623	69.6	8.59	8.64	3		NP_006363.4
228008295	heterogeneous nuclear ribonucleoprotein Q isoform 4 [Homo sapiens]	4.59184	3	3	1	588	65.6	8.6	8.64	3		NP_001153147.1
228008396	heterogeneous nuclear ribonucleoprotein Q isoform 2 [Homo sapiens]	5.81897	3	3	1	464	52	9.16	8.64	3		NP_001153145.1
228008398	heterogeneous nuclear ribonucleoprotein Q isoform 3 [Homo sapiens]	5.12334	3	3	1	527	58.7	7.56	8.64	3		NP_001153146.1
228008400	heterogeneous nuclear ribonucleoprotein Q isoform 6 [Homo sapiens]	4.80427	3	3	1	562	62.6	7.56	8.64	3		NP_001153149.1
238624110	histone H2B type 2-F isoform b [Homo sapiens]	21.6418	3	5	3	134	14.8	10.35	17.7	3		NP_001154806.1
260099723	L-lactate dehydrogenase A chain isoform 3 [Homo sapiens]	6.6482	2	2	2	361	39.8	8.43	5.44	2		NP_001158886.1
261878575	guanine nucleotide-binding protein G(i) subunit alpha-2 isoform 2 [Homo sapiens]	8.1761	2	2	2	318	36.4	5.59	5.5	2		NP_001159897.1
285395246	tubulin alpha chain-like 3 isoform 2 [Homo sapiens]	4.92611	2	2	0	406	45.5	6.32	5	2		NP_001165335.1
296317337	voltage-dependent anion-selective channel protein 2 isoform 1 [Homo sapiens]	30.4207	6	6	5	309	33.4	7.59	18.87	6		NP_001171712.1
301171345	tubulin alpha-8 chain isoform 2 [Homo sapiens]	10.1828	3	3	0	383	42.9	5.08	7.12	3		NP_001180343.1
303227924	matrin-3 isoform a [Homo sapiens]	4.01417	2	2	2	847	94.6	6.25	7.89	2		NP_001181883.1
304555581	elongation factor 1-delta isoform 1 [Homo sapiens]	9.58269	4	4	1	647	71.4	6.42	16.49	4		NP_115754.3
306482694	serine/arginine-rich splicing factor 7 isoform 2 [Homo sapiens]	12.3894	2	2	2	226	26	11.77	2.52	2		NP_001182375.1
308235963	tubulin beta-3 chain isoform 2 [Homo sapiens]	7.40741	2	3	0	378	42.4	4.96	10.6	2		NP_001184110.1
315221152	60S ribosomal protein L11 isoform 2 [Homo sapiens]	18.0791	3	5	3	177	20.1	9.6	16.29	3		NP_001186731.1
315570273	actin, gamma-enteric smooth muscle isoform 2 precursor [Homo sapiens]	13.2132	5	6	0	333	37.1	5.54	14.07	5		NP_001186822.1
316659409	actin, cytoplasmic 2 [Homo sapiens]	47.2	16	22	7	375	41.8	5.48	70.32	16		NP_001186883.1
319996655	c-myc promoter-binding protein-1 isoform MBP-1 [Homo sapiens]	6.74487	2	2	2	341	36.9	6.28	8.58	2		NP_001188412.1
332164775	pyruvate kinase PKM isoform c [Homo sapiens]	7.10744	3	4	3	605	65.9	7.87	18.59	3		NP_001193725.1
332164777	pyruvate kinase PKM isoform d [Homo sapiens]	14.2232	4	5	4	457	49.9	7.83	24.02	4		NP_001193726.1
332164779	pyruvate kinase PKM isoform e [Homo sapiens]	10.0775	3	3	3	516	56.2	8.44	14.76	3		NP_001193727.1
332164781	pyruvate kinase PKM isoform f [Homo sapiens]	8.02239	3	4	3	536	58.5	7.71	18.59	3		NP_001193728.1
342187211	fructose-bisphosphate aldolase A isoform 2 [Homo sapiens]	5.26316	3	3	3	418	45.2	8.25	5.09	3		NP_001230106.1
358356407	60S ribosomal protein L15 isoform 2 [Homo sapiens]	22.069	3	3	3	145	16.7	11.53	8.26	3		NP_001240313.1
359338991	heterogeneous nuclear ribonucleoprotein Q isoform 7 [Homo sapiens]	6.58537	3	3	1	410	46.3	8.88	8.64	3		NP_001240700.1
371502127	macrophage-capping protein isoform 2 [Homo sapiens]	7.50751	2	2	2	333	36.8	7.2	7.53	2		NP_001243069.1
378404908	glyceraldehyde-3-phosphate dehydrogenase isoform 2 [Homo sapiens]	26.9625	6	7	6	293	31.5	7.61	20.7	6		NP_001243728.1
378548190	40S ribosomal protein S3 isoform 1 [Homo sapiens]	32.0988	7	8	7	243	26.7	9.66	26.18	7		NP_001243731.1
381342476	heterogeneous nuclear ribonucleoprotein H [Homo sapiens]	6.4588	2	2	2	449	49.2	6.3	6.93	2		NP_001244222.1
382546007	ATP synthase subunit alpha, mitochondrial isoform b precursor [Homo sapiens]	21.4689	10	11	10	531	57.5	9.29	35.01	10		NP_001244263.1
386869503	40S ribosomal protein S3 isoform 2 [Homo sapiens]	30.1158	7	8	7	259	28.5	9.73	26.18	7		NP_001247435.1
386869506	40S ribosomal protein S3 isoform 3 [Homo sapiens]	27.3504	3	4	3	117	12.6	9.28	13.66	3		NP_001247436.1
392494079	lipoamide acyltransferase component of branched-chain alpha-keto acid dehydrogenase complex, mitochondrial precursor [Homo sapiens]	25.3112	10	11	10	482	53.5	8.51	35.93	10		NP_001909.3
393715091	tubulin alpha-1A chain isoform 1 [Homo sapiens]	16.408	5	5	1	451	50.1	5.06	14.3	5		NP_001257328.1
393715095	tubulin alpha-1A chain isoform 2 [Homo sapiens]	17.7885	5	5	1	416	46.3	5.08	14.3	5		NP_001257329.1
395132436	60S ribosomal protein L18 isoform 2 [Homo sapiens]	25.1572	4	7	4	159	18.1	11.84	26.44	4		NP_001257419.1
431822401	heat shock protein HSP 90-beta isoform a [Homo sapiens]	5.93923	4	4	3	724	83.2	5.03	10.58	4		NP_001258898.1
431822406	heat shock protein HSP 90-beta isoform b [Homo sapiens]	6.36095	4	4	3	676	78.2	5.05	10.58	4		NP_001258900.1
431822408	heat shock protein HSP 90-beta isoform c [Homo sapiens]	6.02241	4	4	3	714	82.3	5.06	10.58	4		NP_001258901.1
459352730	POTE ankyrin domain family member J [Homo sapiens]	3.37187	4	4	2	1038	117.3	5.97	12.49	4		NP_001264012.1
475808427	POTE ankyrin domain family member I [Homo sapiens]	3.25581	4	4	2	1075	121.2	6.21	12.49	4		NP_001264335.1
527317371	structural maintenance of chromosomes protein 1A isoform 2 [Homo sapiens]	2.47729	2	2	2	1211	140.8	7.4	4.95	2		NP_001268392.1
528281411	trifunctional enzyme subunit beta, mitochondrial isoform 2 precursor [Homo sapiens]	3.92157	2	2	2	459	49.6	9.42	5.95	2		NP_001268441.1
530361115	PREDICTED: heterochromatin protein 1-binding protein 3 isoform X1 [Homo sapiens]	7.9566	3	3	3	553	61.2	9.67	8.74	3		XP_005245935.1
530361961	PREDICTED: lipoamide acyltransferase component of branched-chain alpha-keto acid dehydrogenase complex, mitochondrial isoform X1 [Homo sapiens]	34.8837	8	9	8	301	33	8.84	30.47	8		XP_005270602.1
530367944	PREDICTED: serine/arginine-rich splicing factor 7 isoform X1 [Homo sapiens]	11.9149	2	2	2	235	26.9	11.85	2.52	2		XP_005264541.1
530367946	PREDICTED: serine/arginine-rich splicing factor 7 isoform X2 [Homo sapiens]	12.5561	2	2	2	223	25.6	11.8	2.52	2		XP_005264542.1
530370916	PREDICTED: tubulin alpha-4A chain isoform X1 [Homo sapiens]	23.3256	7	7	2	433	48.3	5.01	22.64	7		XP_005246889.1
530374624	PREDICTED: muscleblind-like protein 1 isoform X5 [Homo sapiens]	4.64037	2	2	2	431	46.5	8.79	6.06	2		XP_005247514.1
530374632	PREDICTED: muscleblind-like protein 1 isoform X6 [Homo sapiens]	4.77327	2	2	2	419	45.3	8.85	6.06	2		XP_005247518.1
530374634	PREDICTED: muscleblind-like protein 1 isoform X7 [Homo sapiens]	4.84262	2	2	2	413	44.5	8.72	6.06	2		XP_005247519.1
530374636	PREDICTED: muscleblind-like protein 1 isoform X8 [Homo sapiens]	4.98753	2	2	2	401	43.3	8.76	6.06	2		XP_005247520.1
530374638	PREDICTED: muscleblind-like protein 1 isoform X9 [Homo sapiens]	5	2	2	2	400	43	8.82	6.06	2		XP_005247521.1
530374640	PREDICTED: muscleblind-like protein 1 isoform X10 [Homo sapiens]	5.11509	2	2	2	391	42.5	8.66	6.06	2		XP_005247522.1
530374642	PREDICTED: muscleblind-like protein 1 isoform X1 [Homo sapiens]	5.15464	2	2	2	388	41.8	8.9	6.06	2		XP_005247523.1
530374644	PREDICTED: muscleblind-like protein 1 isoform X11 [Homo sapiens]	5.27704	2	2	2	379	41.4	8.72	6.06	2		XP_005247524.1
530374646	PREDICTED: muscleblind-like protein 1 isoform X13 [Homo sapiens]	5.54017	2	2	2	361	39.4	8.63	6.06	2		XP_005247525.1
530374650	PREDICTED: muscleblind-like protein 1 isoform X17 [Homo sapiens]	5.8309	2	2	2	343	36.5	9.03	6.06	2		XP_005247527.1
530374652	PREDICTED: muscleblind-like protein 1 isoform X4 [Homo sapiens]	5.84795	2	2	2	342	37	8.6	6.06	2		XP_005247528.1
530375914	PREDICTED: 60S ribosomal protein L35a isoform X1 [Homo sapiens]	13.6364	2	2	2	110	12.5	11.06	1.72	2		XP_005269408.1
530376503	PREDICTED: 60S ribosomal protein L9 isoform X1 [Homo sapiens]	10.4167	2	3	2	192	21.9	9.95	6.32	2		XP_005262718.1
530381068	PREDICTED: 60S ribosomal protein L26-like 1 isoform X2 [Homo sapiens]	16.092	2	3	2	174	20.2	10.56	2	2		XP_005265978.1
530381854	PREDICTED: histone H2B type 1-D isoform X1 [Homo sapiens]	19.3333	3	5	3	150	16.3	10.32	17.7	3		XP_005249096.1
530381921	PREDICTED: heat shock 70 kDa protein 1-like isoform X2 [Homo sapiens]	3.12057	2	2	1	705	77.5	7.66	6.78	2		XP_005249127.1
530381923	PREDICTED: heat shock 70 kDa protein 1-like isoform X1 [Homo sapiens]	3.43214	2	2	1	641	70.3	6.02	6.78	2		XP_005249128.1
530382968	PREDICTED: heterogeneous nuclear ribonucleoprotein Q isoform X2 [Homo sapiens]	4.81283	3	3	1	561	62.5	7.56	8.64	3		XP_005248692.1
530382970	PREDICTED: heterogeneous nuclear ribonucleoprotein Q isoform X3 [Homo sapiens]	5.14286	3	3	1	525	59	9.36	8.64	3		XP_005248693.1
530384720	PREDICTED: heterogeneous nuclear ribonucleoproteins A2/B1 isoform X1 [Homo sapiens]	12.1813	3	3	3	353	37.4	8.95	11.23	3		XP_005249786.1
530388819	PREDICTED: elongation factor 1-delta isoform X1 [Homo sapiens]	9.01163	4	4	1	688	75.6	6.43	16.49	4		XP_005250877.1
530400152	PREDICTED: heterogeneous nuclear ribonucleoprotein A1 isoform X1 [Homo sapiens]	8.33333	2	2	2	372	38.7	9.13	5.68	2		XP_005268883.1
530405975	PREDICTED: pyruvate kinase PKM isoform X3 [Homo sapiens]	10.9983	4	5	4	591	64.5	8.02	24.02	4		XP_005254500.1
530410545	PREDICTED: 60S ribosomal protein L26 isoform X1 [Homo sapiens]	19.3103	2	3	2	145	17.2	10.55	2	2		XP_005256807.1
530412176	PREDICTED: keratin, type I cytoskeletal 10 isoform X1 [Homo sapiens]	4.96795	3	3	3	624	63.3	5.26	9.84	3		XP_005257400.1
530416988	PREDICTED: 60S ribosomal protein L28 isoform X1 [Homo sapiens]	24.1176	6	7	6	170	19.1	11.46	20.97	6		XP_005259189.1
530421753	PREDICTED: moesin isoform X2 [Homo sapiens]	3.46021	3	3	3	578	67.9	6.28	5.12	3		XP_005262326.1
530427501	PREDICTED: heterogeneous nuclear ribonucleoprotein M isoform X1 [Homo sapiens]	17.9021	11	12	11	715	76	8.7	36.04	11		XP_005272535.1
530427503	PREDICTED: heterogeneous nuclear ribonucleoprotein M isoform X2 [Homo sapiens]	17.6966	10	12	10	712	75.6	8.57	37.68	10		XP_005272536.1
530427505	PREDICTED: heterogeneous nuclear ribonucleoprotein M isoform X3 [Homo sapiens]	18.9349	11	12	11	676	72.1	8.82	36.04	11		XP_005272537.1
530427507	PREDICTED: heterogeneous nuclear ribonucleoprotein M isoform X4 [Homo sapiens]	24.7541	12	14	12	610	64.4	8.76	45.83	12		XP_005272538.1
530427511	PREDICTED: heterogeneous nuclear ribonucleoprotein M isoform X5 [Homo sapiens]	26.4448	12	14	12	571	60.5	8.92	45.83	12		XP_005272540.1
530427783	PREDICTED: heat shock 70 kDa protein 1-like isoform X2 [Homo sapiens]	3.12057	2	2	1	705	77.5	8.06	6.78	2		XP_005274916.1
530428008	PREDICTED: heat shock 70 kDa protein 1-like isoform X1 [Homo sapiens]	3.43214	2	2	1	641	70.4	6.02	6.78	2		XP_005272873.1
543583773	guanine nucleotide-binding protein G(i) subunit alpha-2 isoform 3 [Homo sapiens]	8.58086	2	2	2	303	34.9	5.38	5.5	2		NP_001269546.1
543583775	guanine nucleotide-binding protein G(i) subunit alpha-2 isoform 4 [Homo sapiens]	9.48905	2	2	2	274	31.5	5.44	5.5	2		NP_001269547.1
543583777	guanine nucleotide-binding protein G(i) subunit alpha-2 isoform 5 [Homo sapiens]	7.66962	2	2	2	339	38.4	5.48	5.5	2		NP_001269548.1
543583779	guanine nucleotide-binding protein G(i) subunit alpha-2 isoform 6 [Homo sapiens]	7.66962	2	2	2	339	38.7	5.86	5.5	2		NP_001269549.1
567757609	chloride intracellular channel protein 1 [Homo sapiens]	11.6183	3	4	3	241	26.9	5.17	12.54	3		NP_001274523.1
574584803	tubulin beta-4A chain isoform 1 [Homo sapiens]	12.3232	4	5	0	495	54.4	5.02	21.22	4		NP_001276052.1
574584811	tubulin beta-4A chain isoform 2 [Homo sapiens]	12.4744	4	5	0	489	53.8	4.98	21.22	4		NP_001276056.1
574584818	tubulin beta-4A chain isoform 4 [Homo sapiens]	11.828	3	4	0	372	41.6	4.94	15.97	3		NP_001276059.1
578798587	PREDICTED: alpha-enolase isoform X1 [Homo sapiens]	8.29493	3	3	3	434	47.3	6.99	11.52	3		XP_006710496.1
578800966	PREDICTED: histone H2B type 2-F isoform X1 [Homo sapiens]	19.7279	3	5	3	147	16.1	9.96	17.7	3		XP_006711398.1
578800968	PREDICTED: histone H2B type 2-F isoform X2 [Homo sapiens]	22.6562	3	5	3	128	14.2	10.29	17.7	3		XP_006711399.1
578807426	PREDICTED: muscleblind-like protein 1 isoform X16 [Homo sapiens]	5.81395	2	2	2	344	36.6	9.03	6.06	2		XP_006713704.1
578807655	PREDICTED: transformer-2 protein homolog beta isoform X1 [Homo sapiens]	13.2979	2	2	2	188	21.9	10.15	9.32	2		XP_006713787.1
578811108	PREDICTED: heterogeneous nuclear ribonucleoprotein H isoform X3 [Homo sapiens]	6.41593	2	2	2	452	49.1	6.92	6.93	2		XP_006714925.1
578811110	PREDICTED: heterogeneous nuclear ribonucleoprotein H isoform X4 [Homo sapiens]	6.75991	2	2	2	429	47.1	6.34	6.93	2		XP_006714926.1
578813467	PREDICTED: heterogeneous nuclear ribonucleoproteins A2/B1 isoform X2 [Homo sapiens]	13.738	3	3	3	313	33.9	9.03	11.23	3		XP_006715777.1
578813594	PREDICTED: actin, cytoplasmic 1 isoform X1 [Homo sapiens]	33.9921	9	10	5	253	28.2	5.34	26.23	9		XP_006715827.1
578815485	PREDICTED: voltage-dependent anion-selective channel protein 3 isoform X1 [Homo sapiens]	6.3745	2	2	1	251	27.2	8.46	5.51	2		XP_006716457.1
578815687	PREDICTED: 60S ribosomal protein L7 isoform X1 [Homo sapiens]	26.4423	5	5	5	208	24.4	10.67	16.68	5		XP_006716526.1
578815872	PREDICTED: elongation factor 1-delta isoform X4 [Homo sapiens]	9.58269	4	4	1	647	71.4	6.42	16.49	4		XP_006716586.1
578819752	PREDICTED: voltage-dependent anion-selective channel protein 2 isoform X1 [Homo sapiens]	31.9728	6	6	5	294	31.5	7.56	18.87	6		XP_006718024.1
578822176	PREDICTED: acetyl-CoA acetyltransferase, mitochondrial isoform X1 [Homo sapiens]	8.01187	2	2	1	337	35.5	7.37	7.14	2		XP_006718897.1
578824099	PREDICTED: 60S ribosomal protein L6 isoform X1 [Homo sapiens]	18.4028	7	9	7	288	32.7	10.58	21.53	7		XP_006719611.1
578827087	PREDICTED: pyruvate kinase PKM isoform X2 [Homo sapiens]	10.7438	4	5	4	605	65.8	7.99	24.02	4		XP_006720633.1
578831236	PREDICTED: serine/arginine-rich splicing factor 1 isoform X1 [Homo sapiens]	10.2041	2	2	2	196	21.8	8.69	4.94	2		XP_006722075.1
578836330	PREDICTED: histone H2B type F-S-like [Homo sapiens]	23.0159	3	5	3	126	13.9	10.37	17.7	3		XP_006723981.1
578837316	PREDICTED: ras-related C3 botulinum toxin substrate 2 isoform X1 [Homo sapiens]	13.6646	2	2	2	161	18	6.32	5.38	2		XP_006724349.1
578839678	PREDICTED: elongation factor 1-delta isoform X2 [Homo sapiens]	9.02475	4	4	1	687	75.5	6.43	16.49	4		XP_006725128.1
578839680	PREDICTED: elongation factor 1-delta isoform X3 [Homo sapiens]	8.88554	4	4	1	664	73	6.34	15.54	4		XP_006725129.1
578846900	PREDICTED: histone H2B type F-S-like [Homo sapiens]	23.0159	3	5	3	126	13.9	10.32	17.7	3		XP_006726868.1
583966148	isocitrate dehydrogenase [NADP], mitochondrial isoform 2 [Homo sapiens]	12.75	5	7	5	400	45.2	7.75	16.99	5		NP_001276839.1
588282794	isocitrate dehydrogenase [NADP], mitochondrial isoform 3 [Homo sapiens]	13.6646	4	6	4	322	36.1	8.38	15.05	4		NP_001277043.1
645912968	tubulin beta chain isoform a [Homo sapiens]	28.6638	10	11	4	464	52	4.96	39.19	10		NP_001280141.1
645912972	tubulin beta chain isoform c [Homo sapiens]	38.4298	6	6	3	242	27.3	4.5	24.32	6		NP_001280142.1
645912975	tubulin beta chain isoform d [Homo sapiens]	29.25	8	9	2	400	44.8	4.98	35.37	8		NP_001280143.1
645912980	tubulin beta chain isoform e [Homo sapiens]	27.4194	7	8	1	372	41.7	4.91	31.16	7		NP_001280144.1
661902998	heterogeneous nuclear ribonucleoprotein M isoform c [Homo sapiens]	21.5126	11	12	11	595	63	8.78	36.04	11		NP_001284347.1
662236851	heterogeneous nuclear ribonucleoprotein R isoform 5 [Homo sapiens]	4.53782	3	3	1	595	66.9	8.29	8.21	3		NP_001284549.1
662236855	heterogeneous nuclear ribonucleoprotein R isoform 6 [Homo sapiens]	5.46559	3	3	1	494	55.7	9.23	8.21	3		NP_001284551.1
665821274	peptidyl-prolyl cis-trans isomerase A isoform 2 [Homo sapiens]	64.7619	4	8	4	105	11.4	7.9	36.95	4		NP_001287910.1
733605064	tubulin alpha-1C chain isoform b [Homo sapiens]	21.256	6	6	1	414	46	5.12	16.97	6		NP_001290045.1
733605926	tubulin alpha-1C chain isoform a [Homo sapiens]	16.9557	6	6	1	519	57.7	5.07	16.97	6		NP_001290043.1
746817426	60S ribosomal protein L10 isoform b [Homo sapiens]	7.87037	2	3	2	216	24.1	9.72	4.75	2		NP_001243506.2
746817430	60S ribosomal protein L10 isoform c [Homo sapiens]	26.9663	5	7	5	178	20.4	10.52	16.01	5		NP_001243509.2
746817432	60S ribosomal protein L10 isoform a [Homo sapiens]	22.4299	5	7	5	214	24.6	10.08	16.01	5		NP_001290554.1
746817434	60S ribosomal protein L10 isoform d [Homo sapiens]	11.7241	2	3	2	145	16.5	9.35	4.75	2		NP_001290555.1
767901838	PREDICTED: heterogeneous nuclear ribonucleoprotein R isoform X5 [Homo sapiens]	4.51505	3	3	1	598	67.2	8.29	8.21	3		XP_011538776.1
767901842	PREDICTED: heterogeneous nuclear ribonucleoprotein R isoform X6 [Homo sapiens]	5.4326	3	3	1	497	56	9.23	8.21	3		XP_011538778.1
767904518	PREDICTED: heterochromatin protein 1-binding protein 3 isoform X2 [Homo sapiens]	8.54369	3	3	3	515	57.2	9.76	8.74	3		XP_011539834.1
767904524	PREDICTED: heterochromatin protein 1-binding protein 3 isoform X3 [Homo sapiens]	5.01475	2	2	2	339	37.9	9.35	5.36	2		XP_011539837.1
767912428	PREDICTED: galectin-8 isoform X1 [Homo sapiens]	5.77508	2	2	2	329	36.8	9.44	6.14	2		XP_011542490.1
767914416	PREDICTED: trifunctional enzyme subunit beta, mitochondrial isoform X1 [Homo sapiens]	3.79747	2	2	2	474	51.3	9.41	5.95	2		XP_011531105.1
767914418	PREDICTED: trifunctional enzyme subunit beta, mitochondrial isoform X2 [Homo sapiens]	3.9823	2	2	2	452	48.8	9.17	5.95	2		XP_011531106.1
767915282	PREDICTED: macrophage-capping protein isoform X1 [Homo sapiens]	7.18391	2	2	2	348	38.5	6.19	7.53	2		XP_011531424.1
767918223	PREDICTED: POTE ankyrin domain family member E isoform X1 [Homo sapiens]	5.32915	5	5	2	957	107.7	6.68	17.72	5		XP_011509518.1
767918225	PREDICTED: POTE ankyrin domain family member E isoform X2 [Homo sapiens]	5.46624	5	5	2	933	105	6.39	17.72	5		XP_011509519.1
767919342	PREDICTED: POTE ankyrin domain family member I isoform X1 [Homo sapiens]	3.22581	4	4	2	1085	122.4	6.2	12.49	4		XP_011509972.1
767919377	PREDICTED: POTE ankyrin domain family member J isoform X1 [Homo sapiens]	3.33969	4	4	2	1048	118.5	5.96	12.49	4		XP_011509985.1
767919570	PREDICTED: POTE ankyrin domain family member F isoform X2 [Homo sapiens]	4.85252	5	5	2	1051	118.7	5.95	17.72	5		XP_011510064.1
767926786	PREDICTED: muscleblind-like protein 1 isoform X12 [Homo sapiens]	5.50964	2	2	2	363	39.7	8.79	6.06	2		XP_011511145.1
767926789	PREDICTED: muscleblind-like protein 1 isoform X14 [Homo sapiens]	5.71429	2	2	2	350	37.3	8.59	6.06	2		XP_011511146.1
767926791	PREDICTED: muscleblind-like protein 1 isoform X15 [Homo sapiens]	5.7971	2	2	2	345	37.7	8.72	6.06	2		XP_011511147.1
767926795	PREDICTED: muscleblind-like protein 1 isoform X18 [Homo sapiens]	6.00601	2	2	2	333	36.5	8.78	6.06	2		XP_011511148.1
767927474	PREDICTED: translocation protein SEC62 isoform X1 [Homo sapiens]	4.70914	2	2	2	361	41.3	6.25	4.95	2		XP_011511416.1
767938358	PREDICTED: heterogeneous nuclear ribonucleoprotein H isoform X1 [Homo sapiens]	6.14407	2	2	2	472	51.2	6.8	6.93	2		XP_011532848.1
767938360	PREDICTED: heterogeneous nuclear ribonucleoprotein H isoform X2 [Homo sapiens]	6.27706	2	2	2	462	50.2	6.8	6.93	2		XP_011532849.1
767938408	PREDICTED: 60S ribosomal protein L26-like 1 isoform X1 [Homo sapiens]	19.3103	2	3	2	145	17.2	10.55	2	2		XP_011532867.1
767939943	PREDICTED: tubulin beta-2B chain isoform X1 [Homo sapiens]	20.9115	5	6	0	373	41.9	4.91	24.77	5		XP_011512873.1
767942082	PREDICTED: elongation factor 1-alpha 1 isoform X1 [Homo sapiens]	17.5325	6	9	6	462	50.1	9.01	31.93	6		XP_011533816.1
767948171	PREDICTED: MICOS complex subunit MIC19 isoform X1 [Homo sapiens]	16.3793	3	4	3	232	26.7	7.75	9.24	3		XP_011514665.1
767960019	PREDICTED: tubulin beta-8 chain isoform X1 [Homo sapiens]	4.56989	2	3	0	372	41.8	4.87	8.99	2		XP_011517761.1
767960085	PREDICTED: ATP synthase subunit gamma, mitochondrial isoform X1 [Homo sapiens]	19.9203	4	4	4	251	27.6	6.81	12.84	4		XP_011517792.1
767963460	PREDICTED: 40S ribosomal protein S24 isoform X1 [Homo sapiens]	12.5	2	2	2	184	20.9	10.55	6.37	2		XP_011538336.1
767963462	PREDICTED: 40S ribosomal protein S24 isoform X2 [Homo sapiens]	12.5683	2	2	2	183	20.8	10.62	6.37	2		XP_011538337.1
767963464	PREDICTED: 40S ribosomal protein S24 isoform X3 [Homo sapiens]	12.6374	2	2	2	182	20.7	10.62	6.37	2		XP_011538338.1
767963468	PREDICTED: 40S ribosomal protein S24 isoform X5 [Homo sapiens]	12.7072	2	2	2	181	20.6	10.61	6.37	2		XP_011538340.1
767970091	PREDICTED: heat shock cognate 71 kDa protein isoform X1 [Homo sapiens]	19.3498	9	11	8	646	70.9	5.52	36.91	9		XP_011541100.1
767975060	PREDICTED: 60S ribosomal protein L6 isoform X2 [Homo sapiens]	29.9435	7	9	7	177	20.4	10.52	21.53	7		XP_011536949.1
767979880	PREDICTED: cathepsin G isoform X1 [Homo sapiens]	10.0372	2	2	2	269	30.2	10.98	5.98	2		XP_011534801.1
767980428	PREDICTED: heterogeneous nuclear ribonucleoproteins C1/C2 isoform X1 [Homo sapiens]	12.7451	3	3	3	306	33.7	5.08	10.4	3		XP_011535013.1
767980445	PREDICTED: heat shock protein HSP 90-alpha isoform X1 [Homo sapiens]	5.04103	3	3	2	853	98	5.16	11.86	3		XP_011535020.1
767983911	PREDICTED: aminopeptidase N isoform X1 [Homo sapiens]	3.10238	2	2	2	967	109.5	5.48	5.31	2		XP_011519775.1
767984412	PREDICTED: pyruvate kinase PKM isoform X4 [Homo sapiens]	11.4841	4	5	4	566	61.4	7.81	24.02	4		XP_011519972.1
767984414	PREDICTED: pyruvate kinase PKM isoform X5 [Homo sapiens]	7.59717	3	4	3	566	61.6	7.68	18.59	3		XP_011519973.1
767984416	PREDICTED: pyruvate kinase PKM isoform X6 [Homo sapiens]	11.7754	4	5	4	552	60.2	7.84	24.02	4		XP_011519974.1
767984418	PREDICTED: pyruvate kinase PKM isoform X7 [Homo sapiens]	7.78986	3	4	3	552	60.3	7.69	18.59	3		XP_011519975.1
767987425	PREDICTED: 60S ribosomal protein L3-like isoform X1 [Homo sapiens]	2.91262	2	2	2	412	46.7	10.48	5.05	2		XP_011520873.1
767988216	PREDICTED: coronin-1A isoform X1 [Homo sapiens]	26.0304	12	13	12	461	51	6.68	42.53	12		XP_011544016.1
767988754	PREDICTED: elongation factor Tu, mitochondrial isoform X1 [Homo sapiens]	6.79157	2	2	2	427	46.8	7.39	6.58	2		XP_011544230.1
768000519	PREDICTED: ATP-dependent RNA helicase DDX39A isoform X1 [Homo sapiens]	8.43091	3	3	3	427	49.1	5.68	11.2	3		XP_011525922.1
768000524	PREDICTED: ATP-dependent RNA helicase DDX39A isoform X2 [Homo sapiens]	10.8108	2	2	2	222	26.1	5.97	7.58	2		XP_011525923.1
768000711	PREDICTED: coatomer subunit epsilon isoform X1 [Homo sapiens]	16.6163	4	4	4	331	36.9	5.16	12.07	4		XP_011525957.1
768000715	PREDICTED: coatomer subunit epsilon isoform X2 [Homo sapiens]	19.7133	4	4	4	279	31.2	5.31	12.07	4		XP_011525958.1
768008730	PREDICTED: heterogeneous nuclear ribonucleoprotein L isoform X2 [Homo sapiens]	5.40541	2	2	2	518	57.4	7.53	6.11	2		XP_011525188.1
768008733	PREDICTED: heterogeneous nuclear ribonucleoprotein L isoform X3 [Homo sapiens]	5.26316	2	2	2	532	59.3	7.84	6.11	2		XP_011525189.1
768008736	PREDICTED: heterogeneous nuclear ribonucleoprotein L isoform X4 [Homo sapiens]	5.30303	2	2	2	528	57.4	8.15	6.11	2		XP_011525190.1
768037765	PREDICTED: moesin isoform X1 [Homo sapiens]	3.27869	3	3	3	610	71.3	6.06	5.12	3		XP_011529261.1
768037772	PREDICTED: moesin isoform X3 [Homo sapiens]	3.53357	3	3	3	566	66.6	6.16	5.12	3		XP_011529262.1
768040779	PREDICTED: 40S ribosomal protein S4, Y isoform 2 isoform X1 [Homo sapiens]	13.4146	5	6	5	246	27.3	9.79	14.76	5		XP_011529725.1
768043533	PREDICTED: heat shock 70 kDa protein 1-like isoform X1 [Homo sapiens]	3.43214	2	2	1	641	70.4	6.29	6.78	2		XP_011544613.1
768044336	PREDICTED: ribonuclease inhibitor isoform X1 [Homo sapiens]	9.97831	3	3	3	461	49.9	4.82	11	3		XP_011544908.1
768047388	PREDICTED: heat shock 70 kDa protein 1-like isoform X2 [Homo sapiens]	3.12057	2	2	1	705	77.5	7.66	6.78	2		XP_011545549.1
768054000	PREDICTED: 40S ribosomal protein S9 isoform X1 [Homo sapiens]	24.2268	7	7	7	194	22.6	10.65	20.07	7		XP_011546661.1

## Sheet: U1_PMA_Biotin_TNE300
Accession	Description	Coverage	# Peptides	# PSMs	# Unique Peptides	# AAs	MW [kDa]	calc. pI	Score A Sequest HT	# Peptides A Sequest HT		Protein Accession
4501881	actin, alpha skeletal muscle [Homo sapiens]	33.1565	12	21	1	377	42	5.39	62.48	12		NP_001091.1
4501883	actin, aortic smooth muscle [Homo sapiens]	36.3395	12	20	1	377	42	5.39	58.95	12		NP_001604.1
4501885	actin, cytoplasmic 1 [Homo sapiens]	60.2667	17	25	5	375	41.7	5.48	79.04	17		NP_001092.1
4501889	actin, gamma-enteric smooth muscle isoform 1 precursor [Homo sapiens]	30.3191	11	19	1	376	41.9	5.48	53.5	11		NP_001606.1
4502303	ATP synthase subunit O, mitochondrial precursor [Homo sapiens]	24.4131	4	6	4	213	23.3	9.96	20.72	4		NP_001688.1
4503475	elongation factor 1-alpha 2 [Homo sapiens]	12.959	5	6	5	463	50.4	9.03	19.45	5		NP_001949.1
4504151	granulins precursor [Homo sapiens]	4.04722	2	2	2	593	63.5	6.83	5.23	2		NP_002078.1
4504245	histone H2A type 1-C [Homo sapiens]	32.3077	4	4	2	130	14.1	11.05	12.59	4		NP_003503.1
4504249	histone H2A type 1 [Homo sapiens]	35.3846	5	5	3	130	14.1	10.9	16.14	5		NP_003505.1
4504253	histone H2AX [Homo sapiens]	16.0839	3	3	1	143	15.1	10.74	7.94	3		NP_002096.1
4504255	histone H2A.Z [Homo sapiens]	23.4375	3	3	1	128	13.5	10.58	8.27	3		NP_002097.1
4504259	histone H2B type 1-L [Homo sapiens]	27.7778	3	4	3	126	13.9	10.32	15.29	3		NP_003510.1
4504261	histone H2B type 1-N [Homo sapiens]	27.7778	3	4	3	126	13.9	10.32	15.29	3		NP_003511.1
4504263	histone H2B type 1-M [Homo sapiens]	27.7778	3	4	3	126	14	10.32	15.29	3		NP_003512.1
4504269	histone H2B type 1-H [Homo sapiens]	27.7778	3	4	3	126	13.9	10.32	15.29	3		NP_003515.1
4504277	histone H2B type 2-E [Homo sapiens]	27.7778	3	4	3	126	13.9	10.32	15.29	3		NP_003519.1
4504981	galectin-1 [Homo sapiens]	48.1481	5	7	5	135	14.7	5.5	22.68	5		NP_002296.1
4505303	myosin light chain 6B [Homo sapiens]	11.5385	2	2	2	208	22.8	5.73	7.68	2		NP_002466.1
4505881	plasminogen isoform 1 precursor [Homo sapiens]	4.44444	4	6	4	810	90.5	7.24	24.41	4		NP_000292.1
4506381	ras-related C3 botulinum toxin substrate 2 [Homo sapiens]	21.875	5	5	5	192	21.4	7.61	12.98	5		NP_002863.1
4506607	60S ribosomal protein L18 isoform 1 [Homo sapiens]	12.234	2	3	2	188	21.6	11.72	8.4	2		NP_000970.1
4506671	60S acidic ribosomal protein P2 [Homo sapiens]	70.4348	5	5	5	115	11.7	4.54	24.3	5		NP_000995.1
4506691	40S ribosomal protein S16 [Homo sapiens]	17.1233	2	2	2	146	16.4	10.21	7.17	2		NP_001011.1
4506693	40S ribosomal protein S17 [Homo sapiens]	16.2963	2	2	2	135	15.5	9.85	2.99	2		NP_001012.1
4506697	40S ribosomal protein S20 isoform 2 [Homo sapiens]	22.6891	2	2	2	119	13.4	9.94	3.62	2		NP_001014.1
4506725	40S ribosomal protein S4, X isoform X isoform [Homo sapiens]	19.7719	5	6	5	263	29.6	10.15	20.32	5		NP_000998.1
4506727	40S ribosomal protein S4, Y isoform 1 [Homo sapiens]	7.98479	2	2	2	263	29.4	10.24	7.02	2		NP_000999.1
4507677	endoplasmin precursor [Homo sapiens]	4.73225	3	3	3	803	92.4	4.84	6.34	3		NP_003290.1
4507729	tubulin beta-2A chain [Homo sapiens]	21.1236	8	10	0	445	49.9	4.89	35.21	8		NP_001060.1
4758504	3-hydroxyacyl-CoA dehydrogenase type-2 isoform 1 [Homo sapiens]	17.6245	2	2	2	261	26.9	7.78	12.13	2		NP_004484.1
4826898	profilin-1 [Homo sapiens]	17.8571	2	2	2	140	15	8.27	7.32	2		NP_005013.1
4826962	ras-related C3 botulinum toxin substrate 3 [Homo sapiens]	9.375	2	2	2	192	21.4	8.15	5.19	2		NP_005043.1
4885049	actin, alpha cardiac muscle 1 proprotein [Homo sapiens]	39.2573	13	22	1	377	42	5.39	67.92	13		NP_005150.1
5031839	keratin, type II cytoskeletal 6A [Homo sapiens]	9.39716	4	4	2	564	60	8	12.57	4		NP_005545.1
5031857	L-lactate dehydrogenase A chain isoform 1 [Homo sapiens]	31.9277	8	8	8	332	36.7	8.27	29.82	8		NP_005557.1
5174735	tubulin beta-4B chain [Homo sapiens]	31.0112	10	12	7	445	49.8	4.89	46.59	10		NP_006079.1
5729770	tripeptidyl-peptidase 1 preproprotein [Homo sapiens]	9.76909	3	3	3	563	61.2	6.48	7.94	3		NP_000382.3
6806890	galectin-9 isoform long [Homo sapiens]	13.2394	3	3	3	355	39.5	9.17	11.71	3		NP_033665.1
6912616	histone H2A.V isoform 1 [Homo sapiens]	23.4375	3	3	1	128	13.5	10.58	8.27	3		NP_036544.1
7669492	glyceraldehyde-3-phosphate dehydrogenase isoform 1 [Homo sapiens]	12.8358	3	3	3	335	36	8.46	9.76	3		NP_002037.2
9845509	ras-related C3 botulinum toxin substrate 1 isoform Rac1b [Homo sapiens]	8.53081	2	2	2	211	23.5	8.63	5.19	2		NP_061485.1
9845511	ras-related C3 botulinum toxin substrate 1 isoform Rac1 [Homo sapiens]	9.375	2	2	2	192	21.4	8.5	5.19	2		NP_008839.2
10800130	histone H2A type 1-D [Homo sapiens]	35.3846	5	5	3	130	14.1	10.9	16.14	5		NP_066409.1
10800140	histone H2B type 1-B [Homo sapiens]	27.7778	3	4	3	126	13.9	10.32	15.29	3		NP_066406.1
10800144	histone cluster 1, H2aj [Homo sapiens]	35.9375	5	5	3	128	13.9	10.89	16.14	5		NP_066544.1
10863927	peptidyl-prolyl cis-trans isomerase A isoform 1 [Homo sapiens]	38.1818	4	4	4	165	18	7.81	19.1	4		NP_066953.1
10864011	sulfide:quinone oxidoreductase, mitochondrial [Homo sapiens]	9.55556	3	3	3	450	49.9	9.11	14.21	3		NP_067022.1
11321601	ATP-dependent 6-phosphofructokinase, platelet type isoform 1 [Homo sapiens]	3.18878	2	2	2	784	85.5	7.55	6.46	2		NP_002618.1
11415026	60S ribosomal protein L18a [Homo sapiens]	10.2273	2	2	2	176	20.7	10.71	5.08	2		NP_000971.1
11968182	40S ribosomal protein S18 [Homo sapiens]	18.4211	3	3	3	152	17.7	10.99	6.25	3		NP_072045.1
13124875	myosin-11 isoform SM2A [Homo sapiens]	2.99278	5	6	5	1938	223.4	5.53	22.05	5		NP_074035.1
13124879	myosin-11 isoform SM1A [Homo sapiens]	2.94118	5	6	5	1972	227.2	5.5	22.05	5		NP_002465.1
13562114	tubulin beta-1 chain [Homo sapiens]	3.99113	2	3	2	451	50.3	5.17	8.19	2		NP_110400.1
14141152	heterogeneous nuclear ribonucleoprotein M isoform a [Homo sapiens]	3.42466	2	2	2	730	77.5	8.7	5.68	2		NP_005959.2
14389309	tubulin alpha-1C chain isoform c [Homo sapiens]	14.2539	4	4	1	449	49.9	5.1	14.94	4		NP_116093.1
15431290	60S ribosomal protein L11 isoform 1 [Homo sapiens]	12.3596	2	2	2	178	20.2	9.6	6.82	2		NP_000966.2
15431310	keratin, type I cytoskeletal 14 [Homo sapiens]	7.62712	3	5	2	472	51.6	5.16	19.08	3		NP_000517.2
15617199	histone H2A type 3 [Homo sapiens]	32.3077	4	4	2	130	14.1	11.05	12.59	4		NP_254280.1
16306566	histone H2B type 1-O [Homo sapiens]	27.7778	3	4	3	126	13.9	10.32	15.29	3		NP_003518.2
16507237	78 kDa glucose-regulated protein precursor [Homo sapiens]	12.6911	6	7	6	654	72.3	5.16	22.12	6		NP_005338.1
16579885	60S ribosomal protein L4 [Homo sapiens]	9.36768	5	5	5	427	47.7	11.06	12.37	5		NP_000959.2
17921989	tubulin alpha-4A chain isoform 1 [Homo sapiens]	12.0536	3	3	1	448	49.9	5.06	10.12	3		NP_005991.1
17921993	tubulin alpha-3C/D chain [Homo sapiens]	14.2222	4	4	1	450	49.9	5.1	13.75	4		NP_005992.1
17986258	myosin light polypeptide 6 isoform 1 [Homo sapiens]	26.4901	3	3	3	151	16.9	4.65	10.79	3		NP_066299.2
18105045	histone H2A type 1-H [Homo sapiens]	35.9375	5	5	3	128	13.9	10.89	16.14	5		NP_542163.1
18105048	histone H2B type 1-K [Homo sapiens]	27.7778	3	4	3	126	13.9	10.32	15.29	3		NP_542160.1
18152783	60S ribosomal protein L10-like [Homo sapiens]	8.8785	2	2	2	214	24.5	10.01	5.69	2		NP_542784.1
19557656	histone H2A type 1-B/E [Homo sapiens]	32.3077	4	4	2	130	14.1	11.05	12.59	4		NP_003504.2
20336752	histone H2B type 1-D [Homo sapiens]	27.7778	3	4	3	126	13.9	10.32	15.29	3		NP_619790.1
20336754	histone H2B type 1-J [Homo sapiens]	27.7778	3	4	3	126	13.9	10.32	15.29	3		NP_066402.2
20357599	histone H2A.V isoform 2 [Homo sapiens]	14.0351	2	2	0	114	12.1	10.46	5.66	2		NP_619541.1
21166389	histone H2B type 1-C/E/F/G/I [Homo sapiens]	27.7778	3	4	3	126	13.9	10.32	15.29	3		NP_003517.2
21361322	tubulin beta-4A chain isoform 3 [Homo sapiens]	25	8	9	6	444	49.6	4.88	38.06	8		NP_006078.2
21361657	protein disulfide-isomerase A3 precursor [Homo sapiens]	10.099	4	4	4	505	56.7	6.35	17.19	4		NP_005304.3
21536301	signal transducer and activator of transcription 1-alpha/beta isoform beta [Homo sapiens]	5.19663	3	3	3	712	83	6.42	11.6	3		NP_644671.1
24234686	heat shock cognate 71 kDa protein isoform 2 [Homo sapiens]	10.9533	4	5	4	493	53.5	5.86	18.95	4		NP_694881.1
24234688	stress-70 protein, mitochondrial precursor [Homo sapiens]	16.9367	9	9	9	679	73.6	6.16	31.15	9		NP_004125.3
24430192	keratin, type I cytoskeletal 16 [Homo sapiens]	10.7822	4	6	3	473	51.2	5.05	21.86	4		NP_005548.2
24586679	histone H2B type 1-A [Homo sapiens]	15.748	2	2	2	127	14.2	10.32	5.09	2		NP_733759.1
24638446	histone H2A type 2-C [Homo sapiens]	35.6589	5	5	3	129	14	10.9	16.14	5		NP_003508.1
25092737	histone H2A type 1-A [Homo sapiens]	17.5573	3	3	1	131	14.2	10.86	7.94	3		NP_734466.1
28173554	histone H2B type 3-B [Homo sapiens]	27.7778	3	4	3	126	13.9	10.32	15.29	3		NP_778225.1
28178832	isocitrate dehydrogenase [NADP], mitochondrial isoform 1 precursor [Homo sapiens]	5.75221	2	2	2	452	50.9	8.69	8.93	2		NP_002159.2
29553970	histone H2A.J [Homo sapiens]	35.6589	5	5	3	129	14	10.9	16.14	5		NP_808760.1
29788768	tubulin beta-2B chain [Homo sapiens]	21.1236	8	10	0	445	49.9	4.89	35.21	8		NP_821080.1
29788785	tubulin beta chain isoform b [Homo sapiens]	31.0811	10	12	0	444	49.6	4.89	46.59	10		NP_821133.1
32567786	keratin, type II cytoskeletal 79 [Homo sapiens]	3.92523	2	2	1	535	57.8	7.2	3.33	2		NP_787028.1
33286418	pyruvate kinase PKM isoform a [Homo sapiens]	9.79284	3	3	3	531	57.9	7.84	8.83	3		NP_002645.3
33286422	pyruvate kinase PKM isoform b [Homo sapiens]	9.79284	3	3	3	531	58	7.71	8.83	3		NP_872271.1
34147630	elongation factor Tu, mitochondrial precursor [Homo sapiens]	5.27473	2	2	2	455	49.8	7.61	7.43	2		NP_003312.3
41399285	60 kDa heat shock protein, mitochondrial [Homo sapiens]	5.2356	3	3	3	573	61	5.87	9.45	3		NP_955472.1
41406067	histone H2A.V isoform 3 [Homo sapiens]	20.5882	2	2	1	102	11	10.23	5.06	2		NP_958844.1
41406071	histone H2A.V isoform 5 [Homo sapiens]	23.3333	2	2	1	90	9.4	10.49	5.06	2		NP_958925.1
42558279	tubulin beta-8 chain [Homo sapiens]	19.8198	6	8	6	444	49.7	4.89	29.07	6		NP_817124.1
46409270	tubulin alpha-3E chain [Homo sapiens]	14.2222	4	4	1	450	49.9	5.1	13.75	4		NP_997195.1
47132620	keratin, type II cytoskeletal 2 epidermal [Homo sapiens]	19.8748	8	8	7	639	65.4	8	34.67	8		NP_000414.2
50345982	ATP synthase subunit alpha, mitochondrial isoform c [Homo sapiens]	25.8449	11	12	11	503	54.5	8.24	39.37	11		NP_001001935.1
50345984	ATP synthase subunit alpha, mitochondrial isoform a precursor [Homo sapiens]	23.5081	11	12	11	553	59.7	9.13	39.37	11		NP_001001937.1
50345988	ATP synthase subunit gamma, mitochondrial isoform L (liver) precursor [Homo sapiens]	8.38926	2	2	2	298	33	9.22	3.7	2		NP_001001973.1
50592996	tubulin beta-3 chain isoform 1 [Homo sapiens]	18.6667	7	8	0	450	50.4	4.93	30.22	7		NP_006077.2
55956899	keratin, type I cytoskeletal 9 [Homo sapiens]	37.3997	13	15	13	623	62	5.24	65.12	13		NP_000217.2
56549119	dynamin-2 isoform 3 [Homo sapiens]	3.9261	2	2	2	866	97.6	7.64	8.88	2		NP_004936.2
56549121	dynamin-2 isoform 1 [Homo sapiens]	3.90805	2	2	2	870	98	7.44	8.88	2		NP_001005360.1
56549123	dynamin-2 isoform 2 [Homo sapiens]	3.90805	2	2	2	870	97.9	7.46	8.88	2		NP_001005361.1
56549125	dynamin-2 isoform 4 [Homo sapiens]	3.9261	2	2	2	866	97.5	7.65	8.88	2		NP_001005362.1
57013276	tubulin alpha-1B chain [Homo sapiens]	14.1907	4	4	1	451	50.1	5.06	13.75	4		NP_006073.2
63055057	beta-actin-like protein 2 [Homo sapiens]	19.6809	7	13	0	376	42	5.59	36.79	7		NP_001017992.1
66912162	histone H2B type 2-F isoform a [Homo sapiens]	27.7778	3	4	3	126	13.9	10.32	15.29	3		NP_001019770.1
67782365	keratin, type II cytoskeletal 7 [Homo sapiens]	4.26439	2	2	0	469	51.4	5.48	4.69	2		NP_005547.3
78000183	60S ribosomal protein L14 [Homo sapiens]	11.1628	2	2	2	215	23.4	10.93	6.43	2		NP_001030168.1
83715985	3-hydroxyacyl-CoA dehydrogenase type-2 isoform 2 [Homo sapiens]	18.254	2	2	2	252	26	7.21	12.13	2		NP_001032900.1
88703062	40S ribosomal protein S4, Y isoform 2 [Homo sapiens]	7.60456	2	3	2	263	29.3	10.08	8.93	2		NP_001034656.1
88999583	myosin light polypeptide 6 isoform 2 [Homo sapiens]	26.4901	3	3	3	151	17	4.55	10.79	3		NP_524147.2
92091583	myosin-11 isoform SM2B [Homo sapiens]	2.98201	5	6	5	1945	224.2	5.53	22.05	5		NP_001035202.1
92091586	myosin-11 isoform SM1B [Homo sapiens]	2.93077	5	6	5	1979	227.9	5.5	22.05	5		NP_001035203.1
102469694	galectin-9 isoform short [Homo sapiens]	14.5511	3	3	3	323	35.9	8.13	11.71	3		NP_002299.2
106775678	histone H2A type 2-A [Homo sapiens]	35.3846	5	5	3	130	14.1	10.9	16.14	5		NP_001035807.1
109148552	keratin, type II cytoskeletal 3 [Homo sapiens]	3.34395	2	2	1	628	64.4	6.48	3.33	2		NP_476429.2
111494237	galectin-9B [Homo sapiens]	7.32394	2	2	2	355	39.5	9.52	7.44	2		NP_001036150.1
111494239	galectin-9C [Homo sapiens]	7.30337	2	2	2	356	39.6	9.19	7.44	2		NP_001035167.2
116284394	myosin-14 isoform 2 [Homo sapiens]	1.75439	3	3	3	1995	227.7	5.6	11.94	3		NP_079005.3
119395750	keratin, type II cytoskeletal 1 [Homo sapiens]	42.5466	18	22	17	644	66	8.12	98.59	18		NP_006112.3
119395754	keratin, type II cytoskeletal 5 [Homo sapiens]	7.11864	4	4	2	590	62.3	7.74	9.07	4		NP_000415.2
119703753	keratin, type II cytoskeletal 6B [Homo sapiens]	8.15603	4	4	0	564	60	8	11.74	4		NP_005546.2
134133226	POTE ankyrin domain family member E [Homo sapiens]	7.90698	6	8	2	1075	121.3	6.2	28.71	6		NP_001077007.1
153791352	POTE ankyrin domain family member F [Homo sapiens]	5.76744	5	7	1	1075	121.4	6.2	19.96	5		NP_001093241.1
153791670	keratin, type II cytoskeletal 2 oral [Homo sapiens]	3.29154	2	2	1	638	65.8	8.12	3.33	2		NP_056932.2
155969697	keratin, type II cytoskeletal 6C [Homo sapiens]	9.39716	4	4	2	564	60	8	12.57	4		NP_775109.2
157412270	heterogeneous nuclear ribonucleoprotein M isoform b [Homo sapiens]	3.61795	2	2	2	691	73.6	8.82	5.68	2		NP_112480.2
195972866	keratin, type I cytoskeletal 10 [Homo sapiens]	21.9178	8	11	7	584	58.8	5.21	50.16	8		NP_000412.3
207028494	L-lactate dehydrogenase A chain isoform 2 [Homo sapiens]	24.0876	5	5	5	274	30.2	7.15	18.27	5		NP_001128711.1
224831241	myosin-14 isoform 3 [Homo sapiens]	1.71906	3	3	3	2036	231.9	5.6	11.94	3		NP_001139281.1
226246671	40S ribosomal protein S20 isoform 1 [Homo sapiens]	19.0141	2	2	2	142	16	9.32	3.62	2		NP_001139699.1
238624110	histone H2B type 2-F isoform b [Homo sapiens]	26.1194	3	4	3	134	14.8	10.35	15.29	3		NP_001154806.1
260099723	L-lactate dehydrogenase A chain isoform 3 [Homo sapiens]	29.3629	8	8	8	361	39.8	8.43	29.82	8		NP_001158886.1
260099725	L-lactate dehydrogenase A chain isoform 4 [Homo sapiens]	21.8978	4	4	4	274	30	8	16.27	4		NP_001158887.1
260099727	L-lactate dehydrogenase A chain isoform 5 [Homo sapiens]	24.8963	4	4	4	241	26.7	8.15	16.27	4		NP_001158888.1
299758394	dynamin-2 isoform 5 [Homo sapiens]	3.91254	2	2	2	869	97.9	7.44	8.88	2		NP_001177645.1
308235963	tubulin beta-3 chain isoform 2 [Homo sapiens]	13.2275	4	5	3	378	42.4	4.96	16.13	4		NP_001184110.1
315221152	60S ribosomal protein L11 isoform 2 [Homo sapiens]	12.4294	2	2	2	177	20.1	9.6	6.82	2		NP_001186731.1
315570273	actin, gamma-enteric smooth muscle isoform 2 precursor [Homo sapiens]	22.5225	8	11	0	333	37.1	5.54	21.93	8		NP_001186822.1
316659409	actin, cytoplasmic 2 [Homo sapiens]	60.2667	17	25	5	375	41.8	5.48	79.04	17		NP_001186883.1
332164775	pyruvate kinase PKM isoform c [Homo sapiens]	8.59504	3	3	3	605	65.9	7.87	8.83	3		NP_001193725.1
332164777	pyruvate kinase PKM isoform d [Homo sapiens]	11.3786	3	3	3	457	49.9	7.83	8.83	3		NP_001193726.1
332164779	pyruvate kinase PKM isoform e [Homo sapiens]	7.55814	2	2	2	516	56.2	8.44	4.26	2		NP_001193727.1
332164781	pyruvate kinase PKM isoform f [Homo sapiens]	9.70149	3	3	3	536	58.5	7.71	8.83	3		NP_001193728.1
334191701	ATP-dependent 6-phosphofructokinase, platelet type isoform 2 [Homo sapiens]	3.22165	2	2	2	776	85.3	8.59	6.46	2		NP_001229268.1
367460087	myosin-10 isoform 2 [Homo sapiens]	1.92308	4	4	4	1976	228.9	5.54	9.76	4		NP_005955.3
367460090	myosin-10 isoform 3 [Homo sapiens]	1.91436	4	4	4	1985	229.9	5.57	9.76	4		NP_001243024.1
372466572	keratin, type II cytoskeletal 8 isoform 1 [Homo sapiens]	5.87084	3	3	0	511	56.6	5.43	7.59	3		NP_001243211.1
372466577	keratin, type II cytoskeletal 8 isoform 2 [Homo sapiens]	6.21118	3	3	0	483	53.7	5.59	7.59	3		NP_001243222.1
378404908	glyceraldehyde-3-phosphate dehydrogenase isoform 2 [Homo sapiens]	14.6758	3	3	3	293	31.5	7.61	9.76	3		NP_001243728.1
378548190	40S ribosomal protein S3 isoform 1 [Homo sapiens]	20.5761	4	5	4	243	26.7	9.66	16.64	4		NP_001243731.1
382546007	ATP synthase subunit alpha, mitochondrial isoform b precursor [Homo sapiens]	18.0791	8	8	8	531	57.5	9.29	25.43	8		NP_001244263.1
386869503	40S ribosomal protein S3 isoform 2 [Homo sapiens]	19.305	4	5	4	259	28.5	9.73	16.64	4		NP_001247435.1
386869506	40S ribosomal protein S3 isoform 3 [Homo sapiens]	24.7863	2	3	2	117	12.6	9.28	10.57	2		NP_001247436.1
393715091	tubulin alpha-1A chain isoform 1 [Homo sapiens]	14.1907	4	4	1	451	50.1	5.06	13.75	4		NP_001257328.1
393715095	tubulin alpha-1A chain isoform 2 [Homo sapiens]	15.3846	4	4	1	416	46.3	5.08	13.75	4		NP_001257329.1
395132436	60S ribosomal protein L18 isoform 2 [Homo sapiens]	14.4654	2	3	2	159	18.1	11.84	8.4	2		NP_001257419.1
431822401	heat shock protein HSP 90-beta isoform a [Homo sapiens]	4.00552	3	3	3	724	83.2	5.03	8.66	3		NP_001258898.1
431822406	heat shock protein HSP 90-beta isoform b [Homo sapiens]	4.28994	3	3	3	676	78.2	5.05	8.66	3		NP_001258900.1
431822408	heat shock protein HSP 90-beta isoform c [Homo sapiens]	4.06162	3	3	3	714	82.3	5.06	8.66	3		NP_001258901.1
459352730	POTE ankyrin domain family member J [Homo sapiens]	3.37187	3	4	1	1038	117.3	5.97	12.53	3		NP_001264012.1
475808427	POTE ankyrin domain family member I [Homo sapiens]	4.27907	4	6	1	1075	121.2	6.21	15.91	4		NP_001264335.1
530370916	PREDICTED: tubulin alpha-4A chain isoform X1 [Homo sapiens]	12.4711	3	3	1	433	48.3	5.01	10.12	3		XP_005246889.1
530381854	PREDICTED: histone H2B type 1-D isoform X1 [Homo sapiens]	23.3333	3	4	3	150	16.3	10.32	15.29	3		XP_005249096.1
530392189	PREDICTED: ATP-dependent 6-phosphofructokinase, platelet type isoform X1 [Homo sapiens]	2.99401	2	2	2	835	90.8	7.11	6.46	2		XP_005252522.1
530392191	PREDICTED: ATP-dependent 6-phosphofructokinase, platelet type isoform X3 [Homo sapiens]	3.18878	2	2	2	784	85.4	7.78	6.46	2		XP_005252523.1
530392193	PREDICTED: ATP-dependent 6-phosphofructokinase, platelet type isoform X4 [Homo sapiens]	3.35121	2	2	2	746	81.7	7.55	6.46	2		XP_005252524.1
530405975	PREDICTED: pyruvate kinase PKM isoform X3 [Homo sapiens]	8.79865	3	3	3	591	64.5	8.02	8.83	3		XP_005254500.1
530410341	PREDICTED: myosin-10 isoform X1 [Homo sapiens]	1.89337	4	4	4	2007	232.4	5.55	9.76	4		XP_005256708.1
530410584	PREDICTED: galectin-9C isoform X1 [Homo sapiens]	7.32394	2	2	2	355	39.5	9.19	7.44	2		XP_005256826.1
530410586	PREDICTED: galectin-9C isoform X3 [Homo sapiens]	8.04954	2	2	2	323	35.9	8.38	7.44	2		XP_005256827.1
530412176	PREDICTED: keratin, type I cytoskeletal 10 isoform X1 [Homo sapiens]	20.5128	8	11	7	624	63.3	5.26	50.16	8		XP_005257400.1
530427501	PREDICTED: heterogeneous nuclear ribonucleoprotein M isoform X1 [Homo sapiens]	3.4965	2	2	2	715	76	8.7	5.68	2		XP_005272535.1
530427505	PREDICTED: heterogeneous nuclear ribonucleoprotein M isoform X3 [Homo sapiens]	3.69822	2	2	2	676	72.1	8.82	5.68	2		XP_005272537.1
530427507	PREDICTED: heterogeneous nuclear ribonucleoprotein M isoform X4 [Homo sapiens]	4.09836	2	2	2	610	64.4	8.76	5.68	2		XP_005272538.1
530427511	PREDICTED: heterogeneous nuclear ribonucleoprotein M isoform X5 [Homo sapiens]	4.37828	2	2	2	571	60.5	8.92	5.68	2		XP_005272540.1
574584803	tubulin beta-4A chain isoform 1 [Homo sapiens]	22.0202	7	8	6	495	54.4	5.02	33.14	7		NP_001276052.1
574584811	tubulin beta-4A chain isoform 2 [Homo sapiens]	22.2904	7	8	6	489	53.8	4.98	33.14	7		NP_001276056.1
574584818	tubulin beta-4A chain isoform 4 [Homo sapiens]	20.6989	5	6	5	372	41.6	4.94	23.97	5		NP_001276059.1
578800966	PREDICTED: histone H2B type 2-F isoform X1 [Homo sapiens]	23.8095	3	4	3	147	16.1	9.96	15.29	3		XP_006711398.1
578800968	PREDICTED: histone H2B type 2-F isoform X2 [Homo sapiens]	27.3438	3	4	3	128	14.2	10.29	15.29	3		XP_006711399.1
578804821	PREDICTED: signal transducer and activator of transcription 1-alpha/beta isoform X1 [Homo sapiens]	6.66667	4	4	4	750	87.3	6.05	11.6	4		XP_006712781.1
578813594	PREDICTED: actin, cytoplasmic 1 isoform X1 [Homo sapiens]	49.0119	10	12	3	253	28.2	5.34	32.2	10		XP_006715827.1
578818414	PREDICTED: ATP-dependent 6-phosphofructokinase, platelet type isoform X2 [Homo sapiens]	3.13676	2	2	2	797	87	7.08	6.46	2		XP_006717512.1
578824099	PREDICTED: 60S ribosomal protein L6 isoform X1 [Homo sapiens]	12.8472	4	4	4	288	32.7	10.58	10.62	4		XP_006719611.1
578827087	PREDICTED: pyruvate kinase PKM isoform X2 [Homo sapiens]	8.59504	3	3	3	605	65.8	7.99	8.83	3		XP_006720633.1
578830909	PREDICTED: galectin-9 isoform X1 [Homo sapiens]	15.1125	3	3	3	311	34.7	8.13	11.71	3		XP_006721955.1
578830911	PREDICTED: galectin-9 isoform X2 [Homo sapiens]	16.9065	3	3	3	278	30.4	9.55	11.71	3		XP_006721956.1
578830913	PREDICTED: galectin-9 isoform X3 [Homo sapiens]	19.1057	3	3	3	246	26.8	8.6	11.71	3		XP_006721957.1
578830915	PREDICTED: galectin-9 isoform X4 [Homo sapiens]	20.0855	3	3	3	234	25.6	8.6	11.71	3		XP_006721958.1
578836330	PREDICTED: histone H2B type F-S-like [Homo sapiens]	27.7778	3	4	3	126	13.9	10.37	15.29	3		XP_006723981.1
578837316	PREDICTED: ras-related C3 botulinum toxin substrate 2 isoform X1 [Homo sapiens]	9.31677	2	2	2	161	18	6.32	5.26	2		XP_006724349.1
578846900	PREDICTED: histone H2B type F-S-like [Homo sapiens]	27.7778	3	4	3	126	13.9	10.32	15.29	3		XP_006726868.1
645912968	tubulin beta chain isoform a [Homo sapiens]	25.6466	8	10	0	464	52	4.96	36.2	8		NP_001280141.1
645912972	tubulin beta chain isoform c [Homo sapiens]	26.8595	5	5	2	242	27.3	4.5	22.4	5		NP_001280142.1
645912975	tubulin beta chain isoform d [Homo sapiens]	29.75	8	10	0	400	44.8	4.98	36.2	8		NP_001280143.1
645912980	tubulin beta chain isoform e [Homo sapiens]	27.957	7	9	6	372	41.7	4.91	32.5	7		NP_001280144.1
661902998	heterogeneous nuclear ribonucleoprotein M isoform c [Homo sapiens]	4.20168	2	2	2	595	63	8.78	5.68	2		NP_001284347.1
665821274	peptidyl-prolyl cis-trans isomerase A isoform 2 [Homo sapiens]	48.5714	3	3	3	105	11.4	7.9	15.85	3		NP_001287910.1
733605064	tubulin alpha-1C chain isoform b [Homo sapiens]	15.4589	4	4	1	414	46	5.12	14.94	4		NP_001290045.1
733605926	tubulin alpha-1C chain isoform a [Homo sapiens]	12.3314	4	4	1	519	57.7	5.07	14.94	4		NP_001290043.1
746815975	tubulin beta-6 chain isoform 1 [Homo sapiens]	7.3991	3	4	3	446	49.8	4.88	12.59	3		NP_001290453.1
746815977	tubulin beta-6 chain isoform 5 [Homo sapiens]	8.66142	3	4	3	381	42.5	4.83	12.59	3		NP_001290457.1
746815999	tubulin beta-6 chain isoform 6 [Homo sapiens]	11	3	4	3	300	34.1	4.84	12.59	3		NP_001290459.1
746816060	tubulin beta-6 chain isoform 3 [Homo sapiens]	8.06846	3	4	3	409	45.7	4.84	12.59	3		NP_001290455.1
746816073	tubulin beta-6 chain isoform 4 [Homo sapiens]	8.82353	3	4	3	374	41.9	4.91	12.59	3		NP_001290456.1
746817430	60S ribosomal protein L10 isoform c [Homo sapiens]	10.6742	2	2	2	178	20.4	10.52	5.69	2		NP_001243509.2
746817432	60S ribosomal protein L10 isoform a [Homo sapiens]	8.8785	2	2	2	214	24.6	10.08	5.69	2		NP_001290554.1
767918223	PREDICTED: POTE ankyrin domain family member E isoform X1 [Homo sapiens]	8.88192	6	8	2	957	107.7	6.68	28.71	6		XP_011509518.1
767918225	PREDICTED: POTE ankyrin domain family member E isoform X2 [Homo sapiens]	9.1104	6	8	2	933	105	6.39	28.71	6		XP_011509519.1
767919342	PREDICTED: POTE ankyrin domain family member I isoform X1 [Homo sapiens]	4.23963	4	6	1	1085	122.4	6.2	15.91	4		XP_011509972.1
767919377	PREDICTED: POTE ankyrin domain family member J isoform X1 [Homo sapiens]	3.33969	3	4	1	1048	118.5	5.96	12.53	3		XP_011509985.1
767919570	PREDICTED: POTE ankyrin domain family member F isoform X2 [Homo sapiens]	5.89914	5	7	1	1051	118.7	5.95	19.96	5		XP_011510064.1
767939943	PREDICTED: tubulin beta-2B chain isoform X1 [Homo sapiens]	16.0858	5	7	4	373	41.9	4.91	21.12	5		XP_011512873.1
767942082	PREDICTED: elongation factor 1-alpha 1 isoform X1 [Homo sapiens]	18.1818	6	7	6	462	50.1	9.01	24.01	6		XP_011533816.1
767960019	PREDICTED: tubulin beta-8 chain isoform X1 [Homo sapiens]	19.6237	5	7	5	372	41.8	4.87	25.37	5		XP_011517761.1
767960021	PREDICTED: tubulin beta-8 chain isoform X2 [Homo sapiens]	11.3402	3	4	3	291	33	4.84	12.59	3		XP_011517762.1
767960085	PREDICTED: ATP synthase subunit gamma, mitochondrial isoform X1 [Homo sapiens]	9.96016	2	2	2	251	27.6	6.81	3.7	2		XP_011517792.1
767970091	PREDICTED: heat shock cognate 71 kDa protein isoform X1 [Homo sapiens]	9.75232	5	6	5	646	70.9	5.52	18.95	5		XP_011541100.1
767974193	PREDICTED: keratin, type II cytoskeletal 3 isoform X1 [Homo sapiens]	4.13386	2	2	1	508	54.8	5.36	3.33	2		XP_011536626.1
767974195	PREDICTED: keratin, type II cytoskeletal 7 isoform X1 [Homo sapiens]	4.49438	2	2	0	445	50.2	5.47	4.69	2		XP_011536627.1
767975060	PREDICTED: 60S ribosomal protein L6 isoform X2 [Homo sapiens]	20.904	4	4	4	177	20.4	10.52	10.62	4		XP_011536949.1
767984412	PREDICTED: pyruvate kinase PKM isoform X4 [Homo sapiens]	9.18728	3	3	3	566	61.4	7.81	8.83	3		XP_011519972.1
767984414	PREDICTED: pyruvate kinase PKM isoform X5 [Homo sapiens]	9.18728	3	3	3	566	61.6	7.68	8.83	3		XP_011519973.1
767984416	PREDICTED: pyruvate kinase PKM isoform X6 [Homo sapiens]	9.42029	3	3	3	552	60.2	7.84	8.83	3		XP_011519974.1
767984418	PREDICTED: pyruvate kinase PKM isoform X7 [Homo sapiens]	9.42029	3	3	3	552	60.3	7.69	8.83	3		XP_011519975.1
767987246	PREDICTED: myosin-11 isoform X1 [Homo sapiens]	3.00674	5	6	5	1929	222.5	5.54	22.05	5		XP_011520804.1
767988216	PREDICTED: coronin-1A isoform X1 [Homo sapiens]	8.67679	3	3	3	461	51	6.68	8.8	3		XP_011544016.1
767991998	PREDICTED: galectin-9B isoform X1 [Homo sapiens]	7.30337	2	2	2	356	39.6	9.52	7.44	2		XP_006721568.2
767992000	PREDICTED: galectin-9B isoform X2 [Homo sapiens]	7.47126	2	2	2	348	39	9.76	7.44	2		XP_011522101.1
767992002	PREDICTED: galectin-9B isoform X3 [Homo sapiens]	8.02469	2	2	2	324	36	8.78	7.44	2		XP_011522102.1
767992004	PREDICTED: galectin-9B isoform X4 [Homo sapiens]	8.04954	2	2	2	323	35.9	8.78	7.44	2		XP_011522103.1
767992006	PREDICTED: galectin-9B isoform X5 [Homo sapiens]	8.33333	2	2	2	312	34.8	8.57	7.44	2		XP_011522104.1
767992008	PREDICTED: galectin-9B isoform X6 [Homo sapiens]	8.36013	2	2	2	311	34.7	8.57	7.44	2		XP_011522105.1
767992010	PREDICTED: galectin-9B isoform X7 [Homo sapiens]	8.55263	2	2	2	304	33.2	9.63	7.44	2		XP_011522106.1
767992012	PREDICTED: galectin-9B isoform X8 [Homo sapiens]	9.319	2	2	2	279	30.6	9.77	7.44	2		XP_011522107.1
767992014	PREDICTED: galectin-9B isoform X9 [Homo sapiens]	9.35252	2	2	2	278	30.5	9.77	7.44	2		XP_011522108.1
767992016	PREDICTED: galectin-9B isoform X10 [Homo sapiens]	9.55882	2	2	2	272	29.9	10.23	7.44	2		XP_011522109.1
767992184	PREDICTED: myosin-10 isoform X2 [Homo sapiens]	1.86549	4	4	4	2037	235.7	5.6	9.76	4		XP_011522177.1
767992186	PREDICTED: myosin-10 isoform X3 [Homo sapiens]	1.8664	4	4	4	2036	235.6	5.6	9.76	4		XP_011522178.1
767992188	PREDICTED: myosin-10 isoform X4 [Homo sapiens]	1.87469	4	4	4	2027	234.5	5.57	9.76	4		XP_011522179.1
767992190	PREDICTED: myosin-10 isoform X5 [Homo sapiens]	1.88492	4	4	4	2016	233.3	5.62	9.76	4		XP_011522180.1
767992192	PREDICTED: myosin-10 isoform X6 [Homo sapiens]	1.88586	4	4	4	2015	233.2	5.62	9.76	4		XP_011522181.1
767992194	PREDICTED: myosin-10 isoform X7 [Homo sapiens]	1.89432	4	4	4	2006	232.2	5.58	9.76	4		XP_011522182.1
767992494	PREDICTED: galectin-9C isoform X2 [Homo sapiens]	8.02469	2	2	2	324	36	8.38	7.44	2		XP_011522295.1
767992496	PREDICTED: galectin-9C isoform X4 [Homo sapiens]	8.33333	2	2	2	312	34.8	8.21	7.44	2		XP_011522296.1
767992498	PREDICTED: galectin-9C isoform X5 [Homo sapiens]	8.55263	2	2	2	304	33.1	9.29	7.44	2		XP_011522297.1
767994737	PREDICTED: galectin-9 isoform X5 [Homo sapiens]	14.9321	2	2	2	221	24.3	8.81	8.49	2		XP_011523098.1
768011134	PREDICTED: myosin-14 isoform X2 [Homo sapiens]	1.71317	3	3	3	2043	232.9	5.68	11.94	3		XP_011525622.1
768011138	PREDICTED: myosin-14 isoform X3 [Homo sapiens]	1.7199	3	3	3	2035	232.2	5.68	11.94	3		XP_011525623.1
768011142	PREDICTED: myosin-14 isoform X4 [Homo sapiens]	1.74043	3	3	3	2011	229.4	5.66	11.94	3		XP_011525624.1
768011147	PREDICTED: myosin-14 isoform X1 [Homo sapiens]	1.74738	3	3	3	2003	228.5	5.6	11.94	3		XP_011525625.1
768024950	PREDICTED: myosin-9 isoform X1 [Homo sapiens]	14.3367	24	26	24	1960	226.4	5.6	86.16	24		XP_011528499.1
768040779	PREDICTED: 40S ribosomal protein S4, Y isoform 2 isoform X1 [Homo sapiens]	8.13008	2	3	2	246	27.3	9.79	8.93	2		XP_011529725.1
768054000	PREDICTED: 40S ribosomal protein S9 isoform X1 [Homo sapiens]	8.76289	2	2	2	194	22.6	10.65	4.92	2		XP_011546661.1

## Sheet: U1_PMA_Biotin_TNE50
Accession	Description	Coverage	# Peptides	# PSMs	# Unique Peptides	# AAs	MW [kDa]	calc. pI	Score A Sequest HT	# Peptides A Sequest HT		Protein Accession
4501881	actin, alpha skeletal muscle [Homo sapiens]	28.6472	9	14	1	377	42	5.39	48.81	9		NP_001091.1
4501883	actin, aortic smooth muscle [Homo sapiens]	25.7294	8	13	1	377	42	5.39	45.29	8		NP_001604.1
4501885	actin, cytoplasmic 1 [Homo sapiens]	40.5333	14	19	6	375	41.7	5.48	65.67	14		NP_001092.1
4501889	actin, gamma-enteric smooth muscle isoform 1 precursor [Homo sapiens]	25.7979	8	13	1	376	41.9	5.48	45.29	8		NP_001606.1
4502303	ATP synthase subunit O, mitochondrial precursor [Homo sapiens]	18.7793	3	5	3	213	23.3	9.96	18.33	3		NP_001688.1
4503475	elongation factor 1-alpha 2 [Homo sapiens]	14.0389	6	8	6	463	50.4	9.03	25.49	6		NP_001949.1
4503481	elongation factor 1-gamma [Homo sapiens]	5.26316	2	2	2	437	50.1	6.67	7.27	2		NP_001395.1
4504151	granulins precursor [Homo sapiens]	7.75717	4	4	4	593	63.5	6.83	9.83	4		NP_002078.1
4504165	gelsolin isoform a precursor [Homo sapiens]	6.13811	3	3	3	782	85.6	6.28	14.04	3		NP_000168.1
4504245	histone H2A type 1-C [Homo sapiens]	32.3077	4	4	2	130	14.1	11.05	14.54	4		NP_003503.1
4504249	histone H2A type 1 [Homo sapiens]	35.3846	5	5	3	130	14.1	10.9	18.56	5		NP_003505.1
4504253	histone H2AX [Homo sapiens]	16.0839	3	3	1	143	15.1	10.74	8.97	3		NP_002096.1
4504255	histone H2A.Z [Homo sapiens]	23.4375	3	3	1	128	13.5	10.58	6.05	3		NP_002097.1
4504259	histone H2B type 1-L [Homo sapiens]	26.1905	3	4	3	126	13.9	10.32	15.68	3		NP_003510.1
4504261	histone H2B type 1-N [Homo sapiens]	26.1905	3	4	3	126	13.9	10.32	15.68	3		NP_003511.1
4504263	histone H2B type 1-M [Homo sapiens]	26.1905	3	4	3	126	14	10.32	15.68	3		NP_003512.1
4504269	histone H2B type 1-H [Homo sapiens]	26.1905	3	4	3	126	13.9	10.32	15.68	3		NP_003515.1
4504277	histone H2B type 2-E [Homo sapiens]	26.1905	3	4	3	126	13.9	10.32	15.68	3		NP_003519.1
4504981	galectin-1 [Homo sapiens]	17.037	2	2	2	135	14.7	5.5	6.55	2		NP_002296.1
4505303	myosin light chain 6B [Homo sapiens]	11.5385	2	3	2	208	22.8	5.73	11.8	2		NP_002466.1
4505571	sequestosome-1 isoform 1 [Homo sapiens]	8.63636	2	2	2	440	47.7	5.22	10.02	2		NP_003891.1
4505881	plasminogen isoform 1 precursor [Homo sapiens]	2.46914	3	5	3	810	90.5	7.24	19.44	3		NP_000292.1
4506597	60S ribosomal protein L12 [Homo sapiens]	13.9394	2	3	2	165	17.8	9.42	12.14	2		NP_000967.1
4506605	60S ribosomal protein L23 [Homo sapiens]	12.1429	2	2	2	140	14.9	10.51	5.1	2		NP_000969.1
4506607	60S ribosomal protein L18 isoform 1 [Homo sapiens]	12.766	2	2	2	188	21.6	11.72	8.2	2		NP_000970.1
4506631	60S ribosomal protein L30 [Homo sapiens]	30.4348	2	2	2	115	12.8	9.63	9.42	2		NP_000980.1
4506663	60S ribosomal protein L8 [Homo sapiens]	10.5058	2	3	2	257	28	11.03	8.02	2		NP_000964.1
4506669	60S acidic ribosomal protein P1 isoform 1 [Homo sapiens]	52.6316	2	2	1	114	11.5	4.32	10.97	2		NP_000994.1
4506671	60S acidic ribosomal protein P2 [Homo sapiens]	93.0435	8	10	7	115	11.7	4.54	47	8		NP_000995.1
4506675	dolichyl-diphosphooligosaccharide--protein glycosyltransferase subunit 1 precursor [Homo sapiens]	6.09555	3	3	3	607	68.5	6.38	9.41	3		NP_002941.1
4506693	40S ribosomal protein S17 [Homo sapiens]	8.88889	2	2	2	135	15.5	9.85	6.7	2		NP_001012.1
4506695	40S ribosomal protein S19 [Homo sapiens]	19.3103	3	3	3	145	16.1	10.32	9.55	3		NP_001013.1
4506697	40S ribosomal protein S20 isoform 2 [Homo sapiens]	18.4874	3	3	3	119	13.4	9.94	11.38	3		NP_001014.1
4506723	40S ribosomal protein S3a isoform 1 [Homo sapiens]	12.8788	3	3	3	264	29.9	9.73	5.56	3		NP_000997.1
4506725	40S ribosomal protein S4, X isoform X isoform [Homo sapiens]	15.9696	5	6	5	263	29.6	10.15	21.66	5		NP_000998.1
4506727	40S ribosomal protein S4, Y isoform 1 [Homo sapiens]	4.94297	2	2	2	263	29.4	10.24	8.23	2		NP_000999.1
4506741	40S ribosomal protein S7 [Homo sapiens]	10.3093	2	2	2	194	22.1	10.1	5.95	2		NP_001002.1
4506743	40S ribosomal protein S8 [Homo sapiens]	18.2692	3	4	3	208	24.2	10.32	12.3	3		NP_001003.1
4507729	tubulin beta-2A chain [Homo sapiens]	24.4944	8	9	1	445	49.9	4.89	43.3	8		NP_001060.1
4758670	leupaxin isoform 2 [Homo sapiens]	8.80829	2	2	2	386	43.3	6.01	5.2	2		NP_004802.1
4826898	profilin-1 [Homo sapiens]	29.2857	3	3	3	140	15	8.27	11.68	3		NP_005013.1
4885049	actin, alpha cardiac muscle 1 proprotein [Homo sapiens]	28.6472	9	14	1	377	42	5.39	48.81	9		NP_005150.1
4885373	histone H1.1 [Homo sapiens]	7.44186	2	3	2	215	21.8	10.99	8.69	2		NP_005316.1
4885375	histone H1.2 [Homo sapiens]	11.7371	3	5	3	213	21.4	10.93	14.98	3		NP_005310.1
4885377	histone H1.3 [Homo sapiens]	11.3122	3	5	3	221	22.3	11.02	14.98	3		NP_005311.1
4885379	histone H1.4 [Homo sapiens]	11.4155	3	5	3	219	21.9	11.03	14.98	3		NP_005312.1
5031857	L-lactate dehydrogenase A chain isoform 1 [Homo sapiens]	13.5542	5	6	4	332	36.7	8.27	21.05	5		NP_005557.1
5032051	40S ribosomal protein S14 [Homo sapiens]	31.1258	4	4	4	151	16.3	10.05	15.21	4		NP_005608.1
5174449	histone H1x [Homo sapiens]	12.6761	2	2	2	213	22.5	10.76	8.26	2		NP_006017.1
5174735	tubulin beta-4B chain [Homo sapiens]	33.0337	10	11	1	445	49.8	4.89	54.29	10		NP_006079.1
6912616	histone H2A.V isoform 1 [Homo sapiens]	23.4375	3	3	1	128	13.5	10.58	6.05	3		NP_036544.1
7669492	glyceraldehyde-3-phosphate dehydrogenase isoform 1 [Homo sapiens]	13.4328	3	3	3	335	36	8.46	12.6	3		NP_002037.2
9507215	tubulin alpha-8 chain isoform 1 [Homo sapiens]	14.0312	4	4	4	449	50.1	5.06	15.91	4		NP_061816.1
10800130	histone H2A type 1-D [Homo sapiens]	35.3846	5	5	3	130	14.1	10.9	18.56	5		NP_066409.1
10800140	histone H2B type 1-B [Homo sapiens]	26.1905	3	4	3	126	13.9	10.32	15.68	3		NP_066406.1
10800144	histone cluster 1, H2aj [Homo sapiens]	35.9375	5	5	3	128	13.9	10.89	18.56	5		NP_066544.1
10863927	peptidyl-prolyl cis-trans isomerase A isoform 1 [Homo sapiens]	38.1818	4	5	4	165	18	7.81	16.86	4		NP_066953.1
10864011	sulfide:quinone oxidoreductase, mitochondrial [Homo sapiens]	9.77778	3	3	3	450	49.9	9.11	14.87	3		NP_067022.1
11321601	ATP-dependent 6-phosphofructokinase, platelet type isoform 1 [Homo sapiens]	2.55102	2	3	2	784	85.5	7.55	8	2		NP_002618.1
11415026	60S ribosomal protein L18a [Homo sapiens]	14.7727	3	4	3	176	20.7	10.71	8.09	3		NP_000971.1
11968182	40S ribosomal protein S18 [Homo sapiens]	22.3684	4	5	4	152	17.7	10.99	14.82	4		NP_072045.1
13124875	myosin-11 isoform SM2A [Homo sapiens]	1.59959	2	5	2	1938	223.4	5.53	24.41	2		NP_074035.1
13124879	myosin-11 isoform SM1A [Homo sapiens]	1.57201	2	5	2	1972	227.2	5.5	24.41	2		NP_002465.1
13376181	tubulin alpha chain-like 3 isoform 1 [Homo sapiens]	4.4843	2	2	2	446	49.9	6.05	5.7	2		NP_079079.1
13904866	60S ribosomal protein L28 isoform 2 [Homo sapiens]	23.3577	4	5	4	137	15.7	12.02	15.36	4		NP_000982.2
14141152	heterogeneous nuclear ribonucleoprotein M isoform a [Homo sapiens]	5.47945	3	3	3	730	77.5	8.7	10.52	3		NP_005959.2
14389309	tubulin alpha-1C chain isoform c [Homo sapiens]	21.6036	7	8	7	449	49.9	5.1	31.53	7		NP_116093.1
14591909	60S ribosomal protein L5 [Homo sapiens]	8.41751	2	2	2	297	34.3	9.72	4.83	2		NP_000960.2
15055539	40S ribosomal protein S2 [Homo sapiens]	10.2389	3	3	3	293	31.3	10.24	8.47	3		NP_002943.2
15431301	60S ribosomal protein L7 [Homo sapiens]	8.06452	2	2	2	248	29.2	10.65	5.33	2		NP_000962.2
15431310	keratin, type I cytoskeletal 14 [Homo sapiens]	3.38983	2	2	2	472	51.6	5.16	5.38	2		NP_000517.2
15617199	histone H2A type 3 [Homo sapiens]	32.3077	4	4	2	130	14.1	11.05	14.54	4		NP_254280.1
16306566	histone H2B type 1-O [Homo sapiens]	26.1905	3	4	3	126	13.9	10.32	15.68	3		NP_003518.2
16507237	78 kDa glucose-regulated protein precursor [Homo sapiens]	12.2324	6	6	5	654	72.3	5.16	22.58	6		NP_005338.1
16579885	60S ribosomal protein L4 [Homo sapiens]	13.8173	7	8	7	427	47.7	11.06	26.1	7		NP_000959.2
16933546	60S acidic ribosomal protein P0 [Homo sapiens]	12.3028	3	3	3	317	34.3	5.97	11.69	3		NP_444505.1
17921989	tubulin alpha-4A chain isoform 1 [Homo sapiens]	18.9732	6	6	6	448	49.9	5.06	22.77	6		NP_005991.1
17921993	tubulin alpha-3C/D chain [Homo sapiens]	16.2222	5	5	5	450	49.9	5.1	19.47	5		NP_005992.1
17986258	myosin light polypeptide 6 isoform 1 [Homo sapiens]	56.9536	7	11	7	151	16.9	4.65	39.25	7		NP_066299.2
18105045	histone H2A type 1-H [Homo sapiens]	35.9375	5	5	3	128	13.9	10.89	18.56	5		NP_542163.1
18105048	histone H2B type 1-K [Homo sapiens]	26.1905	3	4	3	126	13.9	10.32	15.68	3		NP_542160.1
18152783	60S ribosomal protein L10-like [Homo sapiens]	8.8785	2	2	2	214	24.5	10.01	3.21	2		NP_542784.1
19557656	histone H2A type 1-B/E [Homo sapiens]	32.3077	4	4	2	130	14.1	11.05	14.54	4		NP_003504.2
20070125	protein disulfide-isomerase precursor [Homo sapiens]	6.49606	3	3	3	508	57.1	4.87	9.73	3		NP_000909.2
20336752	histone H2B type 1-D [Homo sapiens]	26.1905	3	4	3	126	13.9	10.32	15.68	3		NP_619790.1
20336754	histone H2B type 1-J [Homo sapiens]	26.1905	3	4	3	126	13.9	10.32	15.68	3		NP_066402.2
20357599	histone H2A.V isoform 2 [Homo sapiens]	14.0351	2	2	0	114	12.1	10.46	6.05	2		NP_619541.1
20544168	histone H1t [Homo sapiens]	7.72947	2	3	2	207	22	11.71	8.69	2		NP_005314.2
21166389	histone H2B type 1-C/E/F/G/I [Homo sapiens]	26.1905	3	4	3	126	13.9	10.32	15.68	3		NP_003517.2
21361322	tubulin beta-4A chain isoform 3 [Homo sapiens]	26.8018	8	9	0	444	49.6	4.88	44.99	8		NP_006078.2
21361657	protein disulfide-isomerase A3 precursor [Homo sapiens]	8.91089	4	4	4	505	56.7	6.35	15.55	4		NP_005304.3
21536301	signal transducer and activator of transcription 1-alpha/beta isoform beta [Homo sapiens]	7.58427	4	4	4	712	83	6.42	17.06	4		NP_644671.1
24234686	heat shock cognate 71 kDa protein isoform 2 [Homo sapiens]	6.89655	3	3	2	493	53.5	5.86	10.37	3		NP_694881.1
24234688	stress-70 protein, mitochondrial precursor [Homo sapiens]	9.27835	5	5	5	679	73.6	6.16	15.76	5		NP_004125.3
24430192	keratin, type I cytoskeletal 16 [Homo sapiens]	3.38266	2	2	2	473	51.2	5.05	5.38	2		NP_005548.2
24586679	histone H2B type 1-A [Homo sapiens]	14.1732	2	2	2	127	14.2	10.32	5.32	2		NP_733759.1
24638446	histone H2A type 2-C [Homo sapiens]	35.6589	5	5	3	129	14	10.9	18.56	5		NP_003508.1
25092737	histone H2A type 1-A [Homo sapiens]	17.5573	3	3	1	131	14.2	10.86	8.97	3		NP_734466.1
28173554	histone H2B type 3-B [Homo sapiens]	20.6349	2	3	2	126	13.9	10.32	13.64	2		NP_778225.1
29553970	histone H2A.J [Homo sapiens]	35.6589	5	5	3	129	14	10.9	18.56	5		NP_808760.1
29788768	tubulin beta-2B chain [Homo sapiens]	24.4944	8	9	1	445	49.9	4.89	43.3	8		NP_821080.1
29788785	tubulin beta chain isoform b [Homo sapiens]	40.7658	13	14	4	444	49.6	4.89	63.02	13		NP_821133.1
33286418	pyruvate kinase PKM isoform a [Homo sapiens]	5.64972	2	2	2	531	57.9	7.84	9.11	2		NP_002645.3
33286422	pyruvate kinase PKM isoform b [Homo sapiens]	5.64972	2	2	2	531	58	7.71	9.11	2		NP_872271.1
34147630	elongation factor Tu, mitochondrial precursor [Homo sapiens]	4.83516	2	2	2	455	49.8	7.61	7.57	2		NP_003312.3
41406067	histone H2A.V isoform 3 [Homo sapiens]	20.5882	2	2	1	102	11	10.23	2.52	2		NP_958844.1
41406071	histone H2A.V isoform 5 [Homo sapiens]	23.3333	2	2	1	90	9.4	10.49	2.52	2		NP_958925.1
42558279	tubulin beta-8 chain [Homo sapiens]	14.6396	4	4	0	444	49.7	4.89	18.14	4		NP_817124.1
45439306	aspartate--tRNA ligase, cytoplasmic isoform 1 [Homo sapiens]	4.99002	2	2	2	501	57.1	6.55	7.76	2		NP_001340.2
46409270	tubulin alpha-3E chain [Homo sapiens]	9.33333	3	3	3	450	49.9	5.1	10.99	3		NP_997195.1
46593007	cytochrome b-c1 complex subunit 1, mitochondrial precursor [Homo sapiens]	6.25	2	2	2	480	52.6	6.37	8.02	2		NP_003356.2
47132620	keratin, type II cytoskeletal 2 epidermal [Homo sapiens]	6.10329	2	2	2	639	65.4	8	9.88	2		NP_000414.2
50345982	ATP synthase subunit alpha, mitochondrial isoform c [Homo sapiens]	18.4891	7	7	7	503	54.5	8.24	24.93	7		NP_001001935.1
50345984	ATP synthase subunit alpha, mitochondrial isoform a precursor [Homo sapiens]	16.8174	7	7	7	553	59.7	9.13	24.93	7		NP_001001937.1
50345988	ATP synthase subunit gamma, mitochondrial isoform L (liver) precursor [Homo sapiens]	8.38926	2	2	2	298	33	9.22	3.85	2		NP_001001973.1
50592996	tubulin beta-3 chain isoform 1 [Homo sapiens]	11.7778	5	5	1	450	50.4	4.93	20.06	5		NP_006077.2
55956899	keratin, type I cytoskeletal 9 [Homo sapiens]	14.7673	4	4	4	623	62	5.24	24.94	4		NP_000217.2
57013276	tubulin alpha-1B chain [Homo sapiens]	24.3902	8	9	8	451	50.1	5.06	35.59	8		NP_006073.2
62241042	bifunctional glutamate/proline--tRNA ligase [Homo sapiens]	2.18254	3	3	3	1512	170.5	7.33	7.93	3		NP_004437.2
63055057	beta-actin-like protein 2 [Homo sapiens]	11.7021	4	7	1	376	42	5.59	26.03	4		NP_001017992.1
66912162	histone H2B type 2-F isoform a [Homo sapiens]	26.1905	3	4	3	126	13.9	10.32	15.68	3		NP_001019770.1
78000183	60S ribosomal protein L14 [Homo sapiens]	16.2791	3	3	3	215	23.4	10.93	8.43	3		NP_001030168.1
88999583	myosin light polypeptide 6 isoform 2 [Homo sapiens]	56.9536	7	11	7	151	17	4.55	39.25	7		NP_524147.2
92091583	myosin-11 isoform SM2B [Homo sapiens]	1.59383	2	5	2	1945	224.2	5.53	24.41	2		NP_001035202.1
92091586	myosin-11 isoform SM1B [Homo sapiens]	1.56645	2	5	2	1979	227.9	5.5	24.41	2		NP_001035203.1
106775678	histone H2A type 2-A [Homo sapiens]	35.3846	5	5	3	130	14.1	10.9	18.56	5		NP_001035807.1
114431246	keratin, type I cytoskeletal 28 [Homo sapiens]	3.44828	2	2	2	464	50.5	5.47	5.38	2		NP_853513.2
119395750	keratin, type II cytoskeletal 1 [Homo sapiens]	12.5776	5	6	5	644	66	8.12	31.49	5		NP_006112.3
134133226	POTE ankyrin domain family member E [Homo sapiens]	5.76744	6	7	2	1075	121.3	6.2	25.78	6		NP_001077007.1
148536853	coatomer subunit alpha isoform 2 [Homo sapiens]	6.78105	5	5	5	1224	138.3	7.66	23.87	5		NP_004362.2
148536855	coatomer subunit alpha isoform 1 [Homo sapiens]	6.73155	5	5	5	1233	139.2	7.59	23.87	5		NP_001091868.1
153791352	POTE ankyrin domain family member F [Homo sapiens]	5.76744	6	7	2	1075	121.4	6.2	25.78	6		NP_001093241.1
156071462	ADP/ATP translocase 3 [Homo sapiens]	7.04698	2	2	2	298	32.8	9.74	6.68	2		NP_001627.2
157412270	heterogeneous nuclear ribonucleoprotein M isoform b [Homo sapiens]	5.78871	3	3	3	691	73.6	8.82	10.52	3		NP_112480.2
167614485	3-ketoacyl-CoA thiolase, mitochondrial [Homo sapiens]	7.30479	2	2	2	397	41.9	8.09	2.37	2		NP_006102.2
189083776	gelsolin isoform b [Homo sapiens]	6.56635	3	3	3	731	80.6	5.85	14.04	3		NP_001121136.1
195972866	keratin, type I cytoskeletal 10 [Homo sapiens]	11.1301	5	5	5	584	58.8	5.21	18.23	5		NP_000412.3
207028494	L-lactate dehydrogenase A chain isoform 2 [Homo sapiens]	8.0292	2	2	1	274	30.2	7.15	7.33	2		NP_001128711.1
209915581	60S ribosomal protein L28 isoform 1 [Homo sapiens]	19.6319	4	5	4	163	18.4	10.78	15.36	4		NP_001129606.1
209915584	60S ribosomal protein L28 isoform 3 [Homo sapiens]	18.9349	4	5	4	169	19.1	10.83	15.36	4		NP_001129607.1
209915586	60S ribosomal protein L28 isoform 4 [Homo sapiens]	36.7816	4	5	4	87	10.1	10.67	15.36	4		NP_001129608.1
209915588	60S ribosomal protein L28 isoform 5 [Homo sapiens]	46.3768	4	5	4	69	7.9	10.7	15.36	4		NP_001129609.1
214830451	sequestosome-1 isoform 2 [Homo sapiens]	10.6742	2	2	2	356	38.6	5.47	10.02	2		NP_001135771.1
221316659	leupaxin isoform 1 [Homo sapiens]	8.69565	2	2	2	391	43.7	6.18	5.2	2		NP_001137467.1
222144324	myosin regulatory light chain 12B [Homo sapiens]	17.4419	2	2	2	172	19.8	4.84	8.25	2		NP_001138416.1
226246671	40S ribosomal protein S20 isoform 1 [Homo sapiens]	15.493	3	3	3	142	16	9.32	11.38	3		NP_001139699.1
238624110	histone H2B type 2-F isoform b [Homo sapiens]	24.6269	3	4	3	134	14.8	10.35	15.68	3		NP_001154806.1
260099723	L-lactate dehydrogenase A chain isoform 3 [Homo sapiens]	12.4654	5	6	4	361	39.8	8.43	21.05	5		NP_001158886.1
260099725	L-lactate dehydrogenase A chain isoform 4 [Homo sapiens]	12.7737	4	5	3	274	30	8	17.63	4		NP_001158887.1
260099727	L-lactate dehydrogenase A chain isoform 5 [Homo sapiens]	14.5228	4	5	3	241	26.7	8.15	17.63	4		NP_001158888.1
285395246	tubulin alpha chain-like 3 isoform 2 [Homo sapiens]	4.92611	2	2	2	406	45.5	6.32	5.7	2		NP_001165335.1
291575128	L-lactate dehydrogenase B chain [Homo sapiens]	10.479	3	3	2	334	36.6	6.05	9.21	3		NP_001167568.1
301171345	tubulin alpha-8 chain isoform 2 [Homo sapiens]	16.4491	4	4	4	383	42.9	5.08	15.91	4		NP_001180343.1
308235963	tubulin beta-3 chain isoform 2 [Homo sapiens]	5.02646	2	2	0	378	42.4	4.96	5.78	2		NP_001184110.1
315570273	actin, gamma-enteric smooth muscle isoform 2 precursor [Homo sapiens]	17.4174	5	6	0	333	37.1	5.54	22.58	5		NP_001186822.1
316659409	actin, cytoplasmic 2 [Homo sapiens]	40.5333	14	19	6	375	41.8	5.48	65.67	14		NP_001186883.1
332164775	pyruvate kinase PKM isoform c [Homo sapiens]	4.95868	2	2	2	605	65.9	7.87	9.11	2		NP_001193725.1
332164777	pyruvate kinase PKM isoform d [Homo sapiens]	6.56455	2	2	2	457	49.9	7.83	9.11	2		NP_001193726.1
332164781	pyruvate kinase PKM isoform f [Homo sapiens]	5.59701	2	2	2	536	58.5	7.71	9.11	2		NP_001193728.1
334191701	ATP-dependent 6-phosphofructokinase, platelet type isoform 2 [Homo sapiens]	2.57732	2	3	2	776	85.3	8.59	8	2		NP_001229268.1
378404908	glyceraldehyde-3-phosphate dehydrogenase isoform 2 [Homo sapiens]	15.3584	3	3	3	293	31.5	7.61	12.6	3		NP_001243728.1
378548190	40S ribosomal protein S3 isoform 1 [Homo sapiens]	16.0494	3	4	3	243	26.7	9.66	15.99	3		NP_001243731.1
382546007	ATP synthase subunit alpha, mitochondrial isoform b precursor [Homo sapiens]	10.9228	5	5	5	531	57.5	9.29	16.72	5		NP_001244263.1
384475528	gelsolin isoform d [Homo sapiens]	6.41711	3	3	3	748	82.5	5.63	14.04	3		NP_001244958.1
386869503	40S ribosomal protein S3 isoform 2 [Homo sapiens]	15.0579	3	4	3	259	28.5	9.73	15.99	3		NP_001247435.1
386869506	40S ribosomal protein S3 isoform 3 [Homo sapiens]	22.2222	2	3	2	117	12.6	9.28	11.38	2		NP_001247436.1
390517030	gelsolin isoform f [Homo sapiens]	6.25815	3	3	3	767	84.7	5.83	14.04	3		NP_001121135.2
393715091	tubulin alpha-1A chain isoform 1 [Homo sapiens]	21.5078	7	8	7	451	50.1	5.06	31.53	7		NP_001257328.1
393715095	tubulin alpha-1A chain isoform 2 [Homo sapiens]	23.3173	7	8	7	416	46.3	5.08	31.53	7		NP_001257329.1
395132436	60S ribosomal protein L18 isoform 2 [Homo sapiens]	15.0943	2	2	2	159	18.1	11.84	8.2	2		NP_001257419.1
427918083	gelsolin isoform e [Homo sapiens]	6.49526	3	3	3	739	81.4	5.85	14.04	3		NP_001244959.1
431822401	heat shock protein HSP 90-beta isoform a [Homo sapiens]	3.31492	2	2	2	724	83.2	5.03	6.85	2		NP_001258898.1
431822406	heat shock protein HSP 90-beta isoform b [Homo sapiens]	3.5503	2	2	2	676	78.2	5.05	6.85	2		NP_001258900.1
431822408	heat shock protein HSP 90-beta isoform c [Homo sapiens]	3.36134	2	2	2	714	82.3	5.06	6.85	2		NP_001258901.1
459352730	POTE ankyrin domain family member J [Homo sapiens]	3.37187	4	4	2	1038	117.3	5.97	13.48	4		NP_001264012.1
475808427	POTE ankyrin domain family member I [Homo sapiens]	4.27907	5	5	2	1075	121.2	6.21	16.7	5		NP_001264335.1
530370916	PREDICTED: tubulin alpha-4A chain isoform X1 [Homo sapiens]	19.6305	6	6	6	433	48.3	5.01	22.77	6		XP_005246889.1
530381068	PREDICTED: 60S ribosomal protein L26-like 1 isoform X2 [Homo sapiens]	17.2414	3	4	3	174	20.2	10.56	4.77	3		XP_005265978.1
530381854	PREDICTED: histone H2B type 1-D isoform X1 [Homo sapiens]	22	3	4	3	150	16.3	10.32	15.68	3		XP_005249096.1
530391018	PREDICTED: gelsolin isoform X6 [Homo sapiens]	6.38298	3	3	3	752	82.8	5.85	14.04	3		XP_005251997.1
530392189	PREDICTED: ATP-dependent 6-phosphofructokinase, platelet type isoform X1 [Homo sapiens]	2.39521	2	3	2	835	90.8	7.11	8	2		XP_005252522.1
530392191	PREDICTED: ATP-dependent 6-phosphofructokinase, platelet type isoform X3 [Homo sapiens]	2.55102	2	3	2	784	85.4	7.78	8	2		XP_005252523.1
530392193	PREDICTED: ATP-dependent 6-phosphofructokinase, platelet type isoform X4 [Homo sapiens]	2.68097	2	3	2	746	81.7	7.55	8	2		XP_005252524.1
530405975	PREDICTED: pyruvate kinase PKM isoform X3 [Homo sapiens]	5.07614	2	2	2	591	64.5	8.02	9.11	2		XP_005254500.1
530410545	PREDICTED: 60S ribosomal protein L26 isoform X1 [Homo sapiens]	20.6897	3	4	3	145	17.2	10.55	4.77	3		XP_005256807.1
530412176	PREDICTED: keratin, type I cytoskeletal 10 isoform X1 [Homo sapiens]	10.4167	5	5	5	624	63.3	5.26	18.23	5		XP_005257400.1
530416988	PREDICTED: 60S ribosomal protein L28 isoform X1 [Homo sapiens]	18.8235	4	5	4	170	19.1	11.46	15.36	4		XP_005259189.1
530427501	PREDICTED: heterogeneous nuclear ribonucleoprotein M isoform X1 [Homo sapiens]	5.59441	3	3	3	715	76	8.7	10.52	3		XP_005272535.1
530427505	PREDICTED: heterogeneous nuclear ribonucleoprotein M isoform X3 [Homo sapiens]	5.91716	3	3	3	676	72.1	8.82	10.52	3		XP_005272537.1
530427507	PREDICTED: heterogeneous nuclear ribonucleoprotein M isoform X4 [Homo sapiens]	6.55738	3	3	3	610	64.4	8.76	10.52	3		XP_005272538.1
530427511	PREDICTED: heterogeneous nuclear ribonucleoprotein M isoform X5 [Homo sapiens]	7.00525	3	3	3	571	60.5	8.92	10.52	3		XP_005272540.1
567757609	chloride intracellular channel protein 1 [Homo sapiens]	7.88382	2	2	2	241	26.9	5.17	6.26	2		NP_001274523.1
574584803	tubulin beta-4A chain isoform 1 [Homo sapiens]	23.6364	7	8	0	495	54.4	5.02	39.52	7		NP_001276052.1
574584811	tubulin beta-4A chain isoform 2 [Homo sapiens]	23.9264	7	8	0	489	53.8	4.98	39.52	7		NP_001276056.1
574584818	tubulin beta-4A chain isoform 4 [Homo sapiens]	26.8817	6	7	0	372	41.6	4.94	34.86	6		NP_001276059.1
578800966	PREDICTED: histone H2B type 2-F isoform X1 [Homo sapiens]	22.449	3	4	3	147	16.1	9.96	15.68	3		XP_006711398.1
578800968	PREDICTED: histone H2B type 2-F isoform X2 [Homo sapiens]	25.7812	3	4	3	128	14.2	10.29	15.68	3		XP_006711399.1
578804821	PREDICTED: signal transducer and activator of transcription 1-alpha/beta isoform X1 [Homo sapiens]	7.2	4	4	4	750	87.3	6.05	17.06	4		XP_006712781.1
578813594	PREDICTED: actin, cytoplasmic 1 isoform X1 [Homo sapiens]	31.2253	8	9	5	253	28.2	5.34	33.39	8		XP_006715827.1
578815687	PREDICTED: 60S ribosomal protein L7 isoform X1 [Homo sapiens]	9.61538	2	2	2	208	24.4	10.67	5.33	2		XP_006716526.1
578818414	PREDICTED: ATP-dependent 6-phosphofructokinase, platelet type isoform X2 [Homo sapiens]	2.50941	2	3	2	797	87	7.08	8	2		XP_006717512.1
578822859	PREDICTED: L-lactate dehydrogenase B chain isoform X1 [Homo sapiens]	9.91501	3	3	2	353	39.4	8.9	9.21	3		XP_006719137.1
578824099	PREDICTED: 60S ribosomal protein L6 isoform X1 [Homo sapiens]	10.4167	4	5	4	288	32.7	10.58	12.59	4		XP_006719611.1
578825850	PREDICTED: phosphoenolpyruvate carboxykinase [GTP], mitochondrial isoform X2 [Homo sapiens]	5.4326	2	2	2	497	53.6	8.18	4.09	2		XP_006720221.1
578827087	PREDICTED: pyruvate kinase PKM isoform X2 [Homo sapiens]	4.95868	2	2	2	605	65.8	7.99	9.11	2		XP_006720633.1
578836330	PREDICTED: histone H2B type F-S-like [Homo sapiens]	26.1905	3	4	3	126	13.9	10.37	15.68	3		XP_006723981.1
578846900	PREDICTED: histone H2B type F-S-like [Homo sapiens]	26.1905	3	4	3	126	13.9	10.32	15.68	3		XP_006726868.1
614458221	phosphoenolpyruvate carboxykinase [GTP], mitochondrial isoform 1 precursor [Homo sapiens]	4.21875	2	2	2	640	70.7	7.62	4.09	2		NP_004554.3
614458223	phosphoenolpyruvate carboxykinase [GTP], mitochondrial isoform 2 precursor [Homo sapiens]	6.12245	2	2	2	441	47.5	8.13	4.09	2		NP_001018083.2
645912968	tubulin beta chain isoform a [Homo sapiens]	34.9138	11	12	4	464	52	4.96	52.89	11		NP_001280141.1
645912972	tubulin beta chain isoform c [Homo sapiens]	31.405	6	7	3	242	27.3	4.5	31.56	6		NP_001280142.1
645912975	tubulin beta chain isoform d [Homo sapiens]	36.5	9	10	2	400	44.8	4.98	49.18	9		NP_001280143.1
645912980	tubulin beta chain isoform e [Homo sapiens]	35.2151	8	9	1	372	41.7	4.91	45.03	8		NP_001280144.1
648216372	aspartate--tRNA ligase, cytoplasmic isoform 2 [Homo sapiens]	6.23441	2	2	2	401	45.7	5.71	7.76	2		NP_001280241.1
661902998	heterogeneous nuclear ribonucleoprotein M isoform c [Homo sapiens]	6.72269	3	3	3	595	63	8.78	10.52	3		NP_001284347.1
665821274	peptidyl-prolyl cis-trans isomerase A isoform 2 [Homo sapiens]	48.5714	3	3	3	105	11.4	7.9	13.43	3		NP_001287910.1
733605064	tubulin alpha-1C chain isoform b [Homo sapiens]	23.43	7	8	7	414	46	5.12	31.53	7		NP_001290045.1
733605926	tubulin alpha-1C chain isoform a [Homo sapiens]	18.6898	7	8	7	519	57.7	5.07	31.53	7		NP_001290043.1
740087125	myosin regulatory light chain 12A isoform 1 [Homo sapiens]	17.5439	2	2	2	171	19.8	4.81	8.25	2		NP_001289976.1
740087210	myosin regulatory light chain 12A isoform 2 [Homo sapiens]	16.9492	2	2	2	177	20.4	4.75	8.25	2		NP_001289978.1
746815975	tubulin beta-6 chain isoform 1 [Homo sapiens]	7.3991	3	3	0	446	49.8	4.88	9.67	3		NP_001290453.1
746815977	tubulin beta-6 chain isoform 5 [Homo sapiens]	8.66142	3	3	0	381	42.5	4.83	9.67	3		NP_001290457.1
746815999	tubulin beta-6 chain isoform 6 [Homo sapiens]	11	3	3	0	300	34.1	4.84	9.67	3		NP_001290459.1
746816060	tubulin beta-6 chain isoform 3 [Homo sapiens]	8.06846	3	3	0	409	45.7	4.84	9.67	3		NP_001290455.1
746816073	tubulin beta-6 chain isoform 4 [Homo sapiens]	8.82353	3	3	0	374	41.9	4.91	9.67	3		NP_001290456.1
746817430	60S ribosomal protein L10 isoform c [Homo sapiens]	10.6742	2	2	2	178	20.4	10.52	3.21	2		NP_001243509.2
746817432	60S ribosomal protein L10 isoform a [Homo sapiens]	8.8785	2	2	2	214	24.6	10.08	3.21	2		NP_001290554.1
767918223	PREDICTED: POTE ankyrin domain family member E isoform X1 [Homo sapiens]	6.47858	6	7	2	957	107.7	6.68	25.78	6		XP_011509518.1
767918225	PREDICTED: POTE ankyrin domain family member E isoform X2 [Homo sapiens]	6.64523	6	7	2	933	105	6.39	25.78	6		XP_011509519.1
767919342	PREDICTED: POTE ankyrin domain family member I isoform X1 [Homo sapiens]	4.23963	5	5	2	1085	122.4	6.2	16.7	5		XP_011509972.1
767919377	PREDICTED: POTE ankyrin domain family member J isoform X1 [Homo sapiens]	3.33969	4	4	2	1048	118.5	5.96	13.48	4		XP_011509985.1
767919570	PREDICTED: POTE ankyrin domain family member F isoform X2 [Homo sapiens]	5.89914	6	7	2	1051	118.7	5.95	25.78	6		XP_011510064.1
767938408	PREDICTED: 60S ribosomal protein L26-like 1 isoform X1 [Homo sapiens]	20.6897	3	4	3	145	17.2	10.55	4.77	3		XP_011532867.1
767939943	PREDICTED: tubulin beta-2B chain isoform X1 [Homo sapiens]	20.1072	5	6	0	373	41.9	4.91	29.02	5		XP_011512873.1
767942082	PREDICTED: elongation factor 1-alpha 1 isoform X1 [Homo sapiens]	25.3247	8	11	8	462	50.1	9.01	39.56	8		XP_011533816.1
767957185	PREDICTED: gelsolin isoform X3 [Homo sapiens]	6.03774	3	3	3	795	87	6.28	14.04	3		XP_006717138.2
767957187	PREDICTED: gelsolin isoform X4 [Homo sapiens]	6.15385	3	3	3	780	86.1	5.83	14.04	3		XP_011516886.1
767957189	PREDICTED: gelsolin isoform X5 [Homo sapiens]	6.30749	3	3	3	761	83.8	5.63	14.04	3		XP_011516887.1
767957196	PREDICTED: gelsolin isoform X2 [Homo sapiens]	6.469	3	3	3	742	81.9	5.85	14.04	3		XP_011516890.1
767957209	PREDICTED: gelsolin isoform X7 [Homo sapiens]	8.37696	3	3	3	573	62.8	5.82	14.04	3		XP_011516896.1
767960019	PREDICTED: tubulin beta-8 chain isoform X1 [Homo sapiens]	17.4731	4	4	0	372	41.8	4.87	18.14	4		XP_011517761.1
767960021	PREDICTED: tubulin beta-8 chain isoform X2 [Homo sapiens]	11.3402	3	3	0	291	33	4.84	9.67	3		XP_011517762.1
767960085	PREDICTED: ATP synthase subunit gamma, mitochondrial isoform X1 [Homo sapiens]	9.96016	2	2	2	251	27.6	6.81	3.85	2		XP_011517792.1
767969108	PREDICTED: leupaxin isoform X1 [Homo sapiens]	9.28962	2	2	2	366	41.6	7.84	5.2	2		XP_011543694.1
767970091	PREDICTED: heat shock cognate 71 kDa protein isoform X1 [Homo sapiens]	5.26316	3	3	2	646	70.9	5.52	10.37	3		XP_011541100.1
767975060	PREDICTED: 60S ribosomal protein L6 isoform X2 [Homo sapiens]	16.9492	4	5	4	177	20.4	10.52	12.59	4		XP_011536949.1
767984412	PREDICTED: pyruvate kinase PKM isoform X4 [Homo sapiens]	5.30035	2	2	2	566	61.4	7.81	9.11	2		XP_011519972.1
767984414	PREDICTED: pyruvate kinase PKM isoform X5 [Homo sapiens]	5.30035	2	2	2	566	61.6	7.68	9.11	2		XP_011519973.1
767984416	PREDICTED: pyruvate kinase PKM isoform X6 [Homo sapiens]	5.43478	2	2	2	552	60.2	7.84	9.11	2		XP_011519974.1
767984418	PREDICTED: pyruvate kinase PKM isoform X7 [Homo sapiens]	5.43478	2	2	2	552	60.3	7.69	9.11	2		XP_011519975.1
767987246	PREDICTED: myosin-11 isoform X1 [Homo sapiens]	1.60705	2	5	2	1929	222.5	5.54	24.41	2		XP_011520804.1
767988216	PREDICTED: coronin-1A isoform X1 [Homo sapiens]	14.5336	5	6	5	461	51	6.68	24.86	5		XP_011544016.1
768024950	PREDICTED: myosin-9 isoform X1 [Homo sapiens]	18.5204	26	31	26	1960	226.4	5.6	112.25	26		XP_011528499.1

## Sheet: U1_Biotin_TNE300
Accession	Description	Coverage	# Peptides	# PSMs	# Unique Peptides	# AAs	MW [kDa]	calc. pI	Score A Sequest HT	# Peptides A Sequest HT		Protein Accession
4501881	actin, alpha skeletal muscle [Homo sapiens]	30.504	12	16	1	377	42	5.39	50.52	12		NP_001091.1
4501883	actin, aortic smooth muscle [Homo sapiens]	33.687	13	17	1	377	42	5.39	58.44	13		NP_001604.1
4501885	actin, cytoplasmic 1 [Homo sapiens]	60	18	23	5	375	41.7	5.48	83.3	18		NP_001092.1
4501889	actin, gamma-enteric smooth muscle isoform 1 precursor [Homo sapiens]	27.6596	11	15	1	376	41.9	5.48	46.45	11		NP_001606.1
4502303	ATP synthase subunit O, mitochondrial precursor [Homo sapiens]	39.4366	7	8	7	213	23.3	9.96	29.44	7		NP_001688.1
4503475	elongation factor 1-alpha 2 [Homo sapiens]	7.77538	3	4	3	463	50.4	9.03	15.67	3		NP_001949.1
4504041	guanine nucleotide-binding protein G(i) subunit alpha-2 isoform 1 [Homo sapiens]	16.6197	6	6	6	355	40.4	5.54	21.79	6		NP_002061.1
4504245	histone H2A type 1-C [Homo sapiens]	32.3077	4	4	2	130	14.1	11.05	12.75	4		NP_003503.1
4504249	histone H2A type 1 [Homo sapiens]	35.3846	5	5	3	130	14.1	10.9	16.58	5		NP_003505.1
4504253	histone H2AX [Homo sapiens]	16.0839	3	3	1	143	15.1	10.74	8.14	3		NP_002096.1
4504255	histone H2A.Z [Homo sapiens]	23.4375	3	3	1	128	13.5	10.58	5.56	3		NP_002097.1
4504259	histone H2B type 1-L [Homo sapiens]	27.7778	3	4	3	126	13.9	10.32	14.84	3		NP_003510.1
4504261	histone H2B type 1-N [Homo sapiens]	27.7778	3	4	3	126	13.9	10.32	14.84	3		NP_003511.1
4504263	histone H2B type 1-M [Homo sapiens]	27.7778	3	4	3	126	14	10.32	14.84	3		NP_003512.1
4504269	histone H2B type 1-H [Homo sapiens]	27.7778	3	4	3	126	13.9	10.32	14.84	3		NP_003515.1
4504277	histone H2B type 2-E [Homo sapiens]	27.7778	3	4	3	126	13.9	10.32	14.84	3		NP_003519.1
4504281	histone H3.1 [Homo sapiens]	28.6765	2	2	2	136	15.4	11.12	9.07	2		NP_003520.1
4504347	hemoglobin subunit alpha [Homo sapiens]	16.9014	2	2	2	142	15.2	8.68	8.56	2		NP_000549.1
4504349	hemoglobin subunit beta [Homo sapiens]	12.9252	2	2	2	147	16	7.28	5.93	2		NP_000509.1
4504351	hemoglobin subunit delta [Homo sapiens]	12.9252	2	2	2	147	16	8.05	5.93	2		NP_000510.1
4504981	galectin-1 [Homo sapiens]	57.037	5	8	5	135	14.7	5.5	33.42	5		NP_002296.1
4505303	myosin light chain 6B [Homo sapiens]	11.5385	2	2	2	208	22.8	5.73	6.93	2		NP_002466.1
4505763	phosphoglycerate kinase 1 [Homo sapiens]	6.23501	2	2	2	417	44.6	8.1	4.61	2		NP_000282.1
4505881	plasminogen isoform 1 precursor [Homo sapiens]	4.44444	4	7	4	810	90.5	7.24	29.14	4		NP_000292.1
4506649	60S ribosomal protein L3 isoform a [Homo sapiens]	6.45161	2	2	2	403	46.1	10.18	5.18	2		NP_000958.1
4506661	60S ribosomal protein L7a [Homo sapiens]	12.782	2	2	2	266	30	10.61	4.87	2		NP_000963.1
4506669	60S acidic ribosomal protein P1 isoform 1 [Homo sapiens]	51.7544	2	2	2	114	11.5	4.32	10.19	2		NP_000994.1
4506671	60S acidic ribosomal protein P2 [Homo sapiens]	41.7391	4	4	4	115	11.7	4.54	21.22	4		NP_000995.1
4506691	40S ribosomal protein S16 [Homo sapiens]	17.1233	2	2	2	146	16.4	10.21	6.37	2		NP_001011.1
4506725	40S ribosomal protein S4, X isoform X isoform [Homo sapiens]	11.4068	3	3	3	263	29.6	10.15	10.75	3		NP_000998.1
4507677	endoplasmin precursor [Homo sapiens]	4.48319	3	3	3	803	92.4	4.84	12.8	3		NP_003290.1
4507729	tubulin beta-2A chain [Homo sapiens]	30.7865	9	9	1	445	49.9	4.89	41.19	9		NP_001060.1
4826898	profilin-1 [Homo sapiens]	49.2857	5	5	5	140	15	8.27	21.08	5		NP_005013.1
4885049	actin, alpha cardiac muscle 1 proprotein [Homo sapiens]	36.6048	14	18	1	377	42	5.39	62.51	14		NP_005150.1
4885079	ATP synthase subunit gamma, mitochondrial isoform H (heart) precursor [Homo sapiens]	12.4579	3	3	3	297	32.9	9.31	5.41	3		NP_005165.1
4885399	structural maintenance of chromosomes protein 3 [Homo sapiens]	1.80772	2	2	2	1217	141.5	7.18	7.13	2		NP_005436.1
5031857	L-lactate dehydrogenase A chain isoform 1 [Homo sapiens]	29.5181	9	11	9	332	36.7	8.27	42.06	9		NP_005557.1
5174735	tubulin beta-4B chain [Homo sapiens]	38.2022	12	12	4	445	49.8	4.89	54.59	12		NP_006079.1
6912616	histone H2A.V isoform 1 [Homo sapiens]	23.4375	3	3	1	128	13.5	10.58	5.56	3		NP_036544.1
7669492	glyceraldehyde-3-phosphate dehydrogenase isoform 1 [Homo sapiens]	24.4776	5	5	5	335	36	8.46	16.9	5		NP_002037.2
9507215	tubulin alpha-8 chain isoform 1 [Homo sapiens]	14.922	4	5	4	449	50.1	5.06	19.24	4		NP_061816.1
10800130	histone H2A type 1-D [Homo sapiens]	35.3846	5	5	3	130	14.1	10.9	16.58	5		NP_066409.1
10800140	histone H2B type 1-B [Homo sapiens]	27.7778	3	4	3	126	13.9	10.32	14.84	3		NP_066406.1
10800144	histone cluster 1, H2aj [Homo sapiens]	35.9375	5	5	3	128	13.9	10.89	16.58	5		NP_066544.1
10863927	peptidyl-prolyl cis-trans isomerase A isoform 1 [Homo sapiens]	23.0303	2	2	2	165	18	7.81	11.86	2		NP_066953.1
11415026	60S ribosomal protein L18a [Homo sapiens]	10.2273	2	2	2	176	20.7	10.71	4.82	2		NP_000971.1
14141152	heterogeneous nuclear ribonucleoprotein M isoform a [Homo sapiens]	10.5479	5	5	5	730	77.5	8.7	15.93	5		NP_005959.2
14389309	tubulin alpha-1C chain isoform c [Homo sapiens]	22.7171	7	8	7	449	49.9	5.1	29.82	7		NP_116093.1
15055539	40S ribosomal protein S2 [Homo sapiens]	10.2389	3	3	3	293	31.3	10.24	8.4	3		NP_002943.2
15431290	60S ribosomal protein L11 isoform 1 [Homo sapiens]	12.3596	2	2	2	178	20.2	9.6	5.23	2		NP_000966.2
15431301	60S ribosomal protein L7 [Homo sapiens]	17.3387	6	6	6	248	29.2	10.65	18.39	6		NP_000962.2
15617199	histone H2A type 3 [Homo sapiens]	32.3077	4	4	2	130	14.1	11.05	12.75	4		NP_254280.1
16306566	histone H2B type 1-O [Homo sapiens]	27.7778	3	4	3	126	13.9	10.32	14.84	3		NP_003518.2
16507237	78 kDa glucose-regulated protein precursor [Homo sapiens]	12.2324	6	6	5	654	72.3	5.16	22.18	6		NP_005338.1
17921989	tubulin alpha-4A chain isoform 1 [Homo sapiens]	23.8839	6	7	6	448	49.9	5.06	27.95	6		NP_005991.1
17921993	tubulin alpha-3C/D chain [Homo sapiens]	22.8889	6	6	6	450	49.9	5.1	21.26	6		NP_005992.1
17986258	myosin light polypeptide 6 isoform 1 [Homo sapiens]	15.894	2	2	2	151	16.9	4.65	6.93	2		NP_066299.2
18105045	histone H2A type 1-H [Homo sapiens]	35.9375	5	5	3	128	13.9	10.89	16.58	5		NP_542163.1
18105048	histone H2B type 1-K [Homo sapiens]	27.7778	3	4	3	126	13.9	10.32	14.84	3		NP_542160.1
19557656	histone H2A type 1-B/E [Homo sapiens]	32.3077	4	4	2	130	14.1	11.05	12.75	4		NP_003504.2
20336752	histone H2B type 1-D [Homo sapiens]	27.7778	3	4	3	126	13.9	10.32	14.84	3		NP_619790.1
20336754	histone H2B type 1-J [Homo sapiens]	27.7778	3	4	3	126	13.9	10.32	14.84	3		NP_066402.2
20357599	histone H2A.V isoform 2 [Homo sapiens]	14.0351	2	2	0	114	12.1	10.46	5.56	2		NP_619541.1
21166389	histone H2B type 1-C/E/F/G/I [Homo sapiens]	27.7778	3	4	3	126	13.9	10.32	14.84	3		NP_003517.2
21361322	tubulin beta-4A chain isoform 3 [Homo sapiens]	22.0721	6	6	3	444	49.6	4.88	31.23	6		NP_006078.2
21361657	protein disulfide-isomerase A3 precursor [Homo sapiens]	5.14851	2	2	2	505	56.7	6.35	9.16	2		NP_005304.3
24234686	heat shock cognate 71 kDa protein isoform 2 [Homo sapiens]	13.3874	6	6	5	493	53.5	5.86	18.18	6		NP_694881.1
24234688	stress-70 protein, mitochondrial precursor [Homo sapiens]	8.83652	4	4	4	679	73.6	6.16	12.43	4		NP_004125.3
24586679	histone H2B type 1-A [Homo sapiens]	15.748	2	2	2	127	14.2	10.32	4.93	2		NP_733759.1
24638446	histone H2A type 2-C [Homo sapiens]	35.6589	5	5	3	129	14	10.9	16.58	5		NP_003508.1
25092737	histone H2A type 1-A [Homo sapiens]	17.5573	3	3	1	131	14.2	10.86	8.14	3		NP_734466.1
28173554	histone H2B type 3-B [Homo sapiens]	27.7778	3	4	3	126	13.9	10.32	14.84	3		NP_778225.1
28178832	isocitrate dehydrogenase [NADP], mitochondrial isoform 1 precursor [Homo sapiens]	8.62832	4	4	4	452	50.9	8.69	12.09	4		NP_002159.2
29553970	histone H2A.J [Homo sapiens]	35.6589	5	5	3	129	14	10.9	16.58	5		NP_808760.1
29788768	tubulin beta-2B chain [Homo sapiens]	30.7865	9	9	1	445	49.9	4.89	41.19	9		NP_821080.1
29788785	tubulin beta chain isoform b [Homo sapiens]	35.8108	12	12	0	444	49.6	4.89	53.76	12		NP_821133.1
30581135	structural maintenance of chromosomes protein 1A isoform 1 [Homo sapiens]	1.62206	2	2	2	1233	143.1	7.64	5.98	2		NP_006297.2
33286418	pyruvate kinase PKM isoform a [Homo sapiens]	9.79284	3	3	3	531	57.9	7.84	14.2	3		NP_002645.3
33286422	pyruvate kinase PKM isoform b [Homo sapiens]	5.64972	2	2	2	531	58	7.71	8.94	2		NP_872271.1
34147630	elongation factor Tu, mitochondrial precursor [Homo sapiens]	16.9231	5	5	5	455	49.8	7.61	20.63	5		NP_003312.3
38202257	neutral alpha-glucosidase AB isoform 2 precursor [Homo sapiens]	4.55508	2	2	2	944	106.8	6.14	3.49	2		NP_938148.1
41399285	60 kDa heat shock protein, mitochondrial [Homo sapiens]	8.02792	4	4	4	573	61	5.87	14.99	4		NP_955472.1
41406067	histone H2A.V isoform 3 [Homo sapiens]	20.5882	2	2	1	102	11	10.23	2.55	2		NP_958844.1
41406071	histone H2A.V isoform 5 [Homo sapiens]	23.3333	2	2	1	90	9.4	10.49	2.55	2		NP_958925.1
42558279	tubulin beta-8 chain [Homo sapiens]	9.00901	2	2	1	444	49.7	4.89	9.04	2		NP_817124.1
45439306	aspartate--tRNA ligase, cytoplasmic isoform 1 [Homo sapiens]	4.99002	2	2	2	501	57.1	6.55	5.85	2		NP_001340.2
46409270	tubulin alpha-3E chain [Homo sapiens]	18.2222	5	5	5	450	49.9	5.1	18.83	5		NP_997195.1
50345982	ATP synthase subunit alpha, mitochondrial isoform c [Homo sapiens]	30.6163	12	12	12	503	54.5	8.24	43.48	12		NP_001001935.1
50345984	ATP synthase subunit alpha, mitochondrial isoform a precursor [Homo sapiens]	27.8481	12	12	12	553	59.7	9.13	43.48	12		NP_001001937.1
50345988	ATP synthase subunit gamma, mitochondrial isoform L (liver) precursor [Homo sapiens]	16.7785	4	4	4	298	33	9.22	9.3	4		NP_001001973.1
50592988	cytochrome b-c1 complex subunit 2, mitochondrial precursor [Homo sapiens]	8.38852	3	3	3	453	48.4	8.63	12.08	3		NP_003357.2
50592996	tubulin beta-3 chain isoform 1 [Homo sapiens]	14.8889	6	6	0	450	50.4	4.93	25.5	6		NP_006077.2
57013276	tubulin alpha-1B chain [Homo sapiens]	27.9379	8	9	8	451	50.1	5.06	34.46	8		NP_006073.2
58761500	obg-like ATPase 1 isoform 1 [Homo sapiens]	5.30303	2	2	2	396	44.7	7.81	6.65	2		NP_037473.3
63055057	beta-actin-like protein 2 [Homo sapiens]	19.6809	8	11	0	376	42	5.59	40.71	8		NP_001017992.1
63252886	prolyl 4-hydroxylase subunit alpha-1 isoform 1 precursor [Homo sapiens]	8.2397	3	3	3	534	60.9	6.01	11.02	3		NP_000908.2
66912162	histone H2B type 2-F isoform a [Homo sapiens]	27.7778	3	4	3	126	13.9	10.32	14.84	3		NP_001019770.1
78000183	60S ribosomal protein L14 [Homo sapiens]	11.1628	2	2	2	215	23.4	10.93	6.78	2		NP_001030168.1
88900491	neutral alpha-glucosidase AB isoform 3 precursor [Homo sapiens]	4.45135	2	2	2	966	109.4	6.24	3.49	2		NP_938149.2
88999583	myosin light polypeptide 6 isoform 2 [Homo sapiens]	15.894	2	2	2	151	17	4.55	6.93	2		NP_524147.2
106775678	histone H2A type 2-A [Homo sapiens]	35.3846	5	5	3	130	14.1	10.9	16.58	5		NP_001035807.1
134133226	POTE ankyrin domain family member E [Homo sapiens]	4.74419	4	5	1	1075	121.3	6.2	19.11	4		NP_001077007.1
153791352	POTE ankyrin domain family member F [Homo sapiens]	4.74419	4	5	1	1075	121.4	6.2	19.11	4		NP_001093241.1
153792590	heat shock protein HSP 90-alpha isoform 1 [Homo sapiens]	2.9274	2	2	2	854	98.1	5.16	7.21	2		NP_001017963.2
154146191	heat shock protein HSP 90-alpha isoform 2 [Homo sapiens]	3.4153	2	2	2	732	84.6	5.02	7.21	2		NP_005339.3
157412270	heterogeneous nuclear ribonucleoprotein M isoform b [Homo sapiens]	11.1433	5	5	5	691	73.6	8.82	15.93	5		NP_112480.2
195972866	keratin, type I cytoskeletal 10 [Homo sapiens]	5.13699	3	3	3	584	58.8	5.21	9.46	3		NP_000412.3
207028494	L-lactate dehydrogenase A chain isoform 2 [Homo sapiens]	30.6569	8	10	8	274	30.2	7.15	39.27	8		NP_001128711.1
217272849	prolyl 4-hydroxylase subunit alpha-1 isoform 2 precursor [Homo sapiens]	8.2397	3	3	3	534	61	6.01	11.02	3		NP_001136067.1
217272851	prolyl 4-hydroxylase subunit alpha-1 isoform 3 precursor [Homo sapiens]	8.52713	3	3	3	516	58.9	6.02	11.02	3		NP_001136068.1
238624110	histone H2B type 2-F isoform b [Homo sapiens]	26.1194	3	4	3	134	14.8	10.35	14.84	3		NP_001154806.1
260099723	L-lactate dehydrogenase A chain isoform 3 [Homo sapiens]	27.1468	9	11	9	361	39.8	8.43	42.06	9		NP_001158886.1
261878575	guanine nucleotide-binding protein G(i) subunit alpha-2 isoform 2 [Homo sapiens]	18.5535	6	6	6	318	36.4	5.59	21.79	6		NP_001159897.1
301171345	tubulin alpha-8 chain isoform 2 [Homo sapiens]	17.4935	4	5	4	383	42.9	5.08	19.24	4		NP_001180343.1
308235963	tubulin beta-3 chain isoform 2 [Homo sapiens]	12.6984	4	4	0	378	42.4	4.96	15.96	4		NP_001184110.1
315221152	60S ribosomal protein L11 isoform 2 [Homo sapiens]	12.4294	2	2	2	177	20.1	9.6	5.23	2		NP_001186731.1
315570273	actin, gamma-enteric smooth muscle isoform 2 precursor [Homo sapiens]	19.5195	8	9	0	333	37.1	5.54	25.86	8		NP_001186822.1
316659409	actin, cytoplasmic 2 [Homo sapiens]	60	18	23	5	375	41.8	5.48	83.3	18		NP_001186883.1
332164775	pyruvate kinase PKM isoform c [Homo sapiens]	4.95868	2	2	2	605	65.9	7.87	8.94	2		NP_001193725.1
332164777	pyruvate kinase PKM isoform d [Homo sapiens]	11.3786	3	3	3	457	49.9	7.83	14.2	3		NP_001193726.1
332164779	pyruvate kinase PKM isoform e [Homo sapiens]	7.55814	2	2	2	516	56.2	8.44	9.9	2		NP_001193727.1
332164781	pyruvate kinase PKM isoform f [Homo sapiens]	5.59701	2	2	2	536	58.5	7.71	8.94	2		NP_001193728.1
378404908	glyceraldehyde-3-phosphate dehydrogenase isoform 2 [Homo sapiens]	27.9863	5	5	5	293	31.5	7.61	16.9	5		NP_001243728.1
382546007	ATP synthase subunit alpha, mitochondrial isoform b precursor [Homo sapiens]	22.5989	10	10	10	531	57.5	9.29	36.6	10		NP_001244263.1
393715091	tubulin alpha-1A chain isoform 1 [Homo sapiens]	24.8337	7	7	7	451	50.1	5.06	24.41	7		NP_001257328.1
393715095	tubulin alpha-1A chain isoform 2 [Homo sapiens]	26.9231	7	7	7	416	46.3	5.08	24.41	7		NP_001257329.1
431822401	heat shock protein HSP 90-beta isoform a [Homo sapiens]	3.45304	2	2	2	724	83.2	5.03	7.21	2		NP_001258898.1
431822406	heat shock protein HSP 90-beta isoform b [Homo sapiens]	3.69822	2	2	2	676	78.2	5.05	7.21	2		NP_001258900.1
431822408	heat shock protein HSP 90-beta isoform c [Homo sapiens]	3.5014	2	2	2	714	82.3	5.06	7.21	2		NP_001258901.1
459352730	POTE ankyrin domain family member J [Homo sapiens]	2.31214	2	2	1	1038	117.3	5.97	6.75	2		NP_001264012.1
475808427	POTE ankyrin domain family member I [Homo sapiens]	3.25581	3	3	1	1075	121.2	6.21	9.37	3		NP_001264335.1
499589572	neutral alpha-glucosidase AB isoform 4 [Homo sapiens]	5.04695	2	2	2	852	96.5	5.94	3.49	2		NP_001265121.1
499589599	neutral alpha-glucosidase AB isoform 5 [Homo sapiens]	5.18072	2	2	2	830	93.9	5.82	3.49	2		NP_001265122.1
499589768	neutral alpha-glucosidase AB isoform 6 [Homo sapiens]	5.07674	2	2	2	847	96.2	5.72	3.49	2		NP_001265123.1
527317371	structural maintenance of chromosomes protein 1A isoform 2 [Homo sapiens]	1.65153	2	2	2	1211	140.8	7.4	5.98	2		NP_001268392.1
528281411	trifunctional enzyme subunit beta, mitochondrial isoform 2 precursor [Homo sapiens]	3.7037	2	2	2	459	49.6	9.42	5.37	2		NP_001268441.1
530370916	PREDICTED: tubulin alpha-4A chain isoform X1 [Homo sapiens]	24.7113	6	7	6	433	48.3	5.01	27.95	6		XP_005246889.1
530381854	PREDICTED: histone H2B type 1-D isoform X1 [Homo sapiens]	23.3333	3	4	3	150	16.3	10.32	14.84	3		XP_005249096.1
530405975	PREDICTED: pyruvate kinase PKM isoform X3 [Homo sapiens]	8.79865	3	3	3	591	64.5	8.02	14.2	3		XP_005254500.1
530412176	PREDICTED: keratin, type I cytoskeletal 10 isoform X1 [Homo sapiens]	4.80769	3	3	3	624	63.3	5.26	9.46	3		XP_005257400.1
530427501	PREDICTED: heterogeneous nuclear ribonucleoprotein M isoform X1 [Homo sapiens]	10.7692	5	5	5	715	76	8.7	15.93	5		XP_005272535.1
530427503	PREDICTED: heterogeneous nuclear ribonucleoprotein M isoform X2 [Homo sapiens]	8.70787	4	4	4	712	75.6	8.57	12.71	4		XP_005272536.1
530427505	PREDICTED: heterogeneous nuclear ribonucleoprotein M isoform X3 [Homo sapiens]	11.3905	5	5	5	676	72.1	8.82	15.93	5		XP_005272537.1
530427507	PREDICTED: heterogeneous nuclear ribonucleoprotein M isoform X4 [Homo sapiens]	12.623	5	5	5	610	64.4	8.76	15.93	5		XP_005272538.1
530427511	PREDICTED: heterogeneous nuclear ribonucleoprotein M isoform X5 [Homo sapiens]	13.4851	5	5	5	571	60.5	8.92	15.93	5		XP_005272540.1
543583773	guanine nucleotide-binding protein G(i) subunit alpha-2 isoform 3 [Homo sapiens]	19.4719	6	6	6	303	34.9	5.38	21.79	6		NP_001269546.1
543583775	guanine nucleotide-binding protein G(i) subunit alpha-2 isoform 4 [Homo sapiens]	16.7883	5	5	5	274	31.5	5.44	17.53	5		NP_001269547.1
543583777	guanine nucleotide-binding protein G(i) subunit alpha-2 isoform 5 [Homo sapiens]	17.4041	6	6	6	339	38.4	5.48	21.79	6		NP_001269548.1
543583779	guanine nucleotide-binding protein G(i) subunit alpha-2 isoform 6 [Homo sapiens]	17.4041	6	6	6	339	38.7	5.86	21.79	6		NP_001269549.1
567757609	chloride intracellular channel protein 1 [Homo sapiens]	11.6183	2	2	2	241	26.9	5.17	7.61	2		NP_001274523.1
574584803	tubulin beta-4A chain isoform 1 [Homo sapiens]	19.3939	5	5	3	495	54.4	5.02	26.72	5		NP_001276052.1
574584811	tubulin beta-4A chain isoform 2 [Homo sapiens]	19.6319	5	5	3	489	53.8	4.98	26.72	5		NP_001276056.1
574584818	tubulin beta-4A chain isoform 4 [Homo sapiens]	21.2366	4	4	3	372	41.6	4.94	21.69	4		NP_001276059.1
578800966	PREDICTED: histone H2B type 2-F isoform X1 [Homo sapiens]	23.8095	3	4	3	147	16.1	9.96	14.84	3		XP_006711398.1
578800968	PREDICTED: histone H2B type 2-F isoform X2 [Homo sapiens]	27.3438	3	4	3	128	14.2	10.29	14.84	3		XP_006711399.1
578813594	PREDICTED: actin, cytoplasmic 1 isoform X1 [Homo sapiens]	59.6838	13	15	4	253	28.2	5.34	54.74	13		XP_006715827.1
578815687	PREDICTED: 60S ribosomal protein L7 isoform X1 [Homo sapiens]	20.6731	6	6	6	208	24.4	10.67	18.39	6		XP_006716526.1
578824099	PREDICTED: 60S ribosomal protein L6 isoform X1 [Homo sapiens]	13.1944	5	5	5	288	32.7	10.58	13.33	5		XP_006719611.1
578827087	PREDICTED: pyruvate kinase PKM isoform X2 [Homo sapiens]	8.59504	3	3	3	605	65.8	7.99	14.2	3		XP_006720633.1
578836330	PREDICTED: histone H2B type F-S-like [Homo sapiens]	27.7778	3	4	3	126	13.9	10.37	14.84	3		XP_006723981.1
578846900	PREDICTED: histone H2B type F-S-like [Homo sapiens]	27.7778	3	4	3	126	13.9	10.32	14.84	3		XP_006726868.1
583966148	isocitrate dehydrogenase [NADP], mitochondrial isoform 2 [Homo sapiens]	5.5	2	2	2	400	45.2	7.75	3.4	2		NP_001276839.1
645912968	tubulin beta chain isoform a [Homo sapiens]	30.1724	10	10	0	464	52	4.96	44.22	10		NP_001280141.1
645912972	tubulin beta chain isoform c [Homo sapiens]	38.843	8	8	3	242	27.3	4.5	37.46	8		NP_001280142.1
645912975	tubulin beta chain isoform d [Homo sapiens]	35	10	10	0	400	44.8	4.98	44.22	10		NP_001280143.1
645912980	tubulin beta chain isoform e [Homo sapiens]	37.6344	10	10	0	372	41.7	4.91	44.22	10		NP_001280144.1
648216372	aspartate--tRNA ligase, cytoplasmic isoform 2 [Homo sapiens]	6.23441	2	2	2	401	45.7	5.71	5.85	2		NP_001280241.1
661902998	heterogeneous nuclear ribonucleoprotein M isoform c [Homo sapiens]	12.9412	5	5	5	595	63	8.78	15.93	5		NP_001284347.1
665821274	peptidyl-prolyl cis-trans isomerase A isoform 2 [Homo sapiens]	36.1905	2	2	2	105	11.4	7.9	11.86	2		NP_001287910.1
733605064	tubulin alpha-1C chain isoform b [Homo sapiens]	24.6377	7	8	7	414	46	5.12	29.82	7		NP_001290045.1
733605926	tubulin alpha-1C chain isoform a [Homo sapiens]	19.6532	7	8	7	519	57.7	5.07	29.82	7		NP_001290043.1
767914416	PREDICTED: trifunctional enzyme subunit beta, mitochondrial isoform X1 [Homo sapiens]	3.5865	2	2	2	474	51.3	9.41	5.37	2		XP_011531105.1
767914418	PREDICTED: trifunctional enzyme subunit beta, mitochondrial isoform X2 [Homo sapiens]	3.76106	2	2	2	452	48.8	9.17	5.37	2		XP_011531106.1
767918223	PREDICTED: POTE ankyrin domain family member E isoform X1 [Homo sapiens]	5.32915	4	5	1	957	107.7	6.68	19.11	4		XP_011509518.1
767918225	PREDICTED: POTE ankyrin domain family member E isoform X2 [Homo sapiens]	5.46624	4	5	1	933	105	6.39	19.11	4		XP_011509519.1
767919342	PREDICTED: POTE ankyrin domain family member I isoform X1 [Homo sapiens]	3.22581	3	3	1	1085	122.4	6.2	9.37	3		XP_011509972.1
767919377	PREDICTED: POTE ankyrin domain family member J isoform X1 [Homo sapiens]	2.29008	2	2	1	1048	118.5	5.96	6.75	2		XP_011509985.1
767919570	PREDICTED: POTE ankyrin domain family member F isoform X2 [Homo sapiens]	4.85252	4	5	1	1051	118.7	5.95	19.11	4		XP_011510064.1
767939943	PREDICTED: tubulin beta-2B chain isoform X1 [Homo sapiens]	31.6354	7	7	1	373	41.9	4.91	31.65	7		XP_011512873.1
767942082	PREDICTED: elongation factor 1-alpha 1 isoform X1 [Homo sapiens]	12.987	4	6	4	462	50.1	9.01	25.61	4		XP_011533816.1
767960019	PREDICTED: tubulin beta-8 chain isoform X1 [Homo sapiens]	10.7527	2	2	1	372	41.8	4.87	9.04	2		XP_011517761.1
767960085	PREDICTED: ATP synthase subunit gamma, mitochondrial isoform X1 [Homo sapiens]	19.9203	4	4	4	251	27.6	6.81	9.3	4		XP_011517792.1
767970091	PREDICTED: heat shock cognate 71 kDa protein isoform X1 [Homo sapiens]	17.6471	8	8	7	646	70.9	5.52	27.79	8		XP_011541100.1
767975060	PREDICTED: 60S ribosomal protein L6 isoform X2 [Homo sapiens]	21.4689	5	5	5	177	20.4	10.52	13.33	5		XP_011536949.1
767980445	PREDICTED: heat shock protein HSP 90-alpha isoform X1 [Homo sapiens]	2.93083	2	2	2	853	98	5.16	7.21	2		XP_011535020.1
767984412	PREDICTED: pyruvate kinase PKM isoform X4 [Homo sapiens]	9.18728	3	3	3	566	61.4	7.81	14.2	3		XP_011519972.1
767984414	PREDICTED: pyruvate kinase PKM isoform X5 [Homo sapiens]	5.30035	2	2	2	566	61.6	7.68	8.94	2		XP_011519973.1
767984416	PREDICTED: pyruvate kinase PKM isoform X6 [Homo sapiens]	9.42029	3	3	3	552	60.2	7.84	14.2	3		XP_011519974.1
767984418	PREDICTED: pyruvate kinase PKM isoform X7 [Homo sapiens]	5.43478	2	2	2	552	60.3	7.69	8.94	2		XP_011519975.1
767988216	PREDICTED: coronin-1A isoform X1 [Homo sapiens]	18.6551	6	6	6	461	51	6.68	26.05	6		XP_011544016.1
767988754	PREDICTED: elongation factor Tu, mitochondrial isoform X1 [Homo sapiens]	12.8806	3	3	3	427	46.8	7.39	12.85	3		XP_011544230.1

## Sheet: U1_Biotin_TNE50
Accession	Description	Coverage	# Peptides	# PSMs	# Unique Peptides	# AAs	MW [kDa]	calc. pI	Score A Sequest HT	# Peptides A Sequest HT			Protein Accession
4501881	actin, alpha skeletal muscle [Homo sapiens]	29.443	10	20	1	377	42	5.39	67.59	10			NP_001091.1
4501883	actin, aortic smooth muscle [Homo sapiens]	26.5252	9	19	1	377	42	5.39	63.48	9			NP_001604.1
4501885	actin, cytoplasmic 1 [Homo sapiens]	42.4	15	26	6	375	41.7	5.48	92.52	15			NP_001092.1
4501889	actin, gamma-enteric smooth muscle isoform 1 precursor [Homo sapiens]	26.5957	9	19	1	376	41.9	5.48	63.48	9			NP_001606.1
4502303	ATP synthase subunit O, mitochondrial precursor [Homo sapiens]	29.5775	5	7	5	213	23.3	9.96	27.74	5			NP_001688.1
4503149	cathepsin G preproprotein [Homo sapiens]	19.2157	5	5	5	255	28.8	11.19	15.14	5			NP_001902.1
4503475	elongation factor 1-alpha 2 [Homo sapiens]	10.3672	4	6	4	463	50.4	9.03	15.31	4			NP_001949.1
4503481	elongation factor 1-gamma [Homo sapiens]	5.26316	2	2	2	437	50.1	6.67	7.61	2			NP_001395.1
4503483	elongation factor 2 [Homo sapiens]	8.85781	5	5	5	858	95.3	6.83	19.53	5			NP_001952.1
4503571	alpha-enolase isoform 1 [Homo sapiens]	7.37327	2	2	2	434	47.1	7.39	8.69	2			NP_001419.1
4504041	guanine nucleotide-binding protein G(i) subunit alpha-2 isoform 1 [Homo sapiens]	16.338	4	4	4	355	40.4	5.54	8.99	4			NP_002061.1
4504151	granulins precursor [Homo sapiens]	7.08263	3	3	3	593	63.5	6.83	12.02	3			NP_002078.1
4504245	histone H2A type 1-C [Homo sapiens]	32.3077	4	4	2	130	14.1	11.05	12.59	4			NP_003503.1
4504249	histone H2A type 1 [Homo sapiens]	35.3846	5	6	3	130	14.1	10.9	19.91	5			NP_003505.1
4504253	histone H2AX [Homo sapiens]	16.0839	3	3	1	143	15.1	10.74	8.86	3			NP_002096.1
4504255	histone H2A.Z [Homo sapiens]	31.25	4	4	2	128	13.5	10.58	8.71	4			NP_002097.1
4504259	histone H2B type 1-L [Homo sapiens]	28.5714	4	8	4	126	13.9	10.32	32.82	4			NP_003510.1
4504261	histone H2B type 1-N [Homo sapiens]	28.5714	4	8	4	126	13.9	10.32	32.82	4			NP_003511.1
4504263	histone H2B type 1-M [Homo sapiens]	28.5714	4	8	4	126	14	10.32	32.82	4			NP_003512.1
4504269	histone H2B type 1-H [Homo sapiens]	28.5714	4	8	4	126	13.9	10.32	32.82	4			NP_003515.1
4504277	histone H2B type 2-E [Homo sapiens]	28.5714	4	8	4	126	13.9	10.32	32.82	4			NP_003519.1
4504323	histone H4 [Homo sapiens]	39.8058	5	6	5	103	11.4	11.36	13.88	5			NP_003539.1
4504347	hemoglobin subunit alpha [Homo sapiens]	16.9014	2	2	2	142	15.2	8.68	7.93	2			NP_000549.1
4504447	heterogeneous nuclear ribonucleoproteins A2/B1 isoform A2 [Homo sapiens]	8.21114	2	2	2	341	36	8.65	6.58	2			NP_002128.1
4504505	peroxisomal multifunctional enzyme type 2 isoform 2 [Homo sapiens]	5.84239	3	3	3	736	79.6	8.84	11.34	3			NP_000405.1
4504511	dnaJ homolog subfamily A member 1 [Homo sapiens]	6.80101	2	2	2	397	44.8	7.08	3.52	2			NP_001530.1
4505227	myeloid cell nuclear differentiation antigen [Homo sapiens]	16.2162	5	5	5	407	45.8	9.76	18	5			NP_002423.1
4505303	myosin light chain 6B [Homo sapiens]	11.5385	2	2	2	208	22.8	5.73	7.63	2			NP_002466.1
4505763	phosphoglycerate kinase 1 [Homo sapiens]	10.7914	3	4	3	417	44.6	8.1	19.53	3			NP_000282.1
4505881	plasminogen isoform 1 precursor [Homo sapiens]	4.44444	4	10	4	810	90.5	7.24	39.77	4			NP_000292.1
4506381	ras-related C3 botulinum toxin substrate 2 [Homo sapiens]	26.0417	5	5	4	192	21.4	7.61	12.43	5			NP_002863.1
4506597	60S ribosomal protein L12 [Homo sapiens]	32.7273	4	5	4	165	17.8	9.42	22.07	4			NP_000967.1
4506605	60S ribosomal protein L23 [Homo sapiens]	13.5714	2	2	2	140	14.9	10.51	6.52	2			NP_000969.1
4506607	60S ribosomal protein L18 isoform 1 [Homo sapiens]	28.1915	5	7	5	188	21.6	11.72	24.04	5			NP_000970.1
4506625	60S ribosomal protein L27a [Homo sapiens]	8.78378	2	2	2	148	16.6	11	6.03	2			NP_000981.1
4506631	60S ribosomal protein L30 [Homo sapiens]	40.8696	3	3	3	115	12.8	9.63	13.79	3			NP_000980.1
4506661	60S ribosomal protein L7a [Homo sapiens]	23.3083	4	4	4	266	30	10.61	15.32	4			NP_000963.1
4506663	60S ribosomal protein L8 [Homo sapiens]	17.8988	4	5	4	257	28	11.03	17.7	4			NP_000964.1
4506671	60S acidic ribosomal protein P2 [Homo sapiens]	77.3913	6	10	6	115	11.7	4.54	53.32	6			NP_000995.1
4506675	dolichyl-diphosphooligosaccharide--protein glycosyltransferase subunit 1 precursor [Homo sapiens]	3.78913	2	2	2	607	68.5	6.38	7.87	2			NP_002941.1
4506685	40S ribosomal protein S13 [Homo sapiens]	18.543	2	2	2	151	17.2	10.54	4.02	2			NP_001008.1
4506693	40S ribosomal protein S17 [Homo sapiens]	15.5556	3	4	3	135	15.5	9.85	12.74	3			NP_001012.1
4506697	40S ribosomal protein S20 isoform 2 [Homo sapiens]	22.6891	3	3	3	119	13.4	9.94	10.5	3			NP_001014.1
4506701	40S ribosomal protein S23 [Homo sapiens]	23.7762	3	3	3	143	15.8	10.49	7.95	3			NP_001016.1
4506703	40S ribosomal protein S24 isoform c [Homo sapiens]	17.2932	2	2	2	133	15.4	10.78	6.85	2			NP_001017.1
4506723	40S ribosomal protein S3a isoform 1 [Homo sapiens]	21.2121	5	6	5	264	29.9	9.73	12.52	5			NP_000997.1
4506725	40S ribosomal protein S4, X isoform X isoform [Homo sapiens]	35.3612	9	9	9	263	29.6	10.15	34.18	9			NP_000998.1
4506727	40S ribosomal protein S4, Y isoform 1 [Homo sapiens]	8.36502	2	2	2	263	29.4	10.24	7.14	2			NP_000999.1
4506743	40S ribosomal protein S8 [Homo sapiens]	26.4423	4	4	4	208	24.2	10.32	10.66	4			NP_001003.1
4506901	serine/arginine-rich splicing factor 3 [Homo sapiens]	17.0732	3	3	3	164	19.3	11.65	9.8	3			NP_003008.1
4507729	tubulin beta-2A chain [Homo sapiens]	25.8427	7	11	0	445	49.9	4.89	48.59	7			NP_001060.1
4508047	zyxin [Homo sapiens]	7.51748	3	3	3	572	61.2	6.67	11.56	3			NP_003452.1
4557014	catalase [Homo sapiens]	20.6831	8	8	8	527	59.7	7.39	29.66	8			NP_001743.1
4557237	acetyl-CoA acetyltransferase, mitochondrial precursor [Homo sapiens]	5.62061	2	2	1	427	45.2	8.85	8.03	2			NP_000010.1
4557894	lysozyme C precursor [Homo sapiens]	41.8919	4	4	4	148	16.5	9.16	16.64	4			NP_000230.1
4757900	calreticulin precursor [Homo sapiens]	8.15348	3	3	3	417	48.1	4.44	9.99	3			NP_004334.1
4759098	transformer-2 protein homolog beta isoform 1 [Homo sapiens]	8.68056	2	3	2	288	33.6	11.25	12.46	2			NP_004584.1
4826686	ATP-dependent RNA helicase DDX1 [Homo sapiens]	2.43243	2	2	2	740	82.4	7.23	2.97	2			NP_004930.1
4826898	profilin-1 [Homo sapiens]	57.1429	8	10	8	140	15	8.27	39.4	8			NP_005013.1
4826962	ras-related C3 botulinum toxin substrate 3 [Homo sapiens]	10.9375	2	2	1	192	21.4	8.15	6.57	2			NP_005043.1
4885049	actin, alpha cardiac muscle 1 proprotein [Homo sapiens]	29.443	10	20	1	377	42	5.39	67.59	10			NP_005150.1
4885079	ATP synthase subunit gamma, mitochondrial isoform H (heart) precursor [Homo sapiens]	7.40741	2	2	2	297	32.9	9.31	6.16	2			NP_005165.1
4885373	histone H1.1 [Homo sapiens]	7.44186	3	3	3	215	21.8	10.99	14.28	3			NP_005316.1
4885375	histone H1.2 [Homo sapiens]	17.8404	5	8	5	213	21.4	10.93	33.02	5			NP_005310.1
4885377	histone H1.3 [Homo sapiens]	17.6471	6	9	6	221	22.3	11.02	37.33	6			NP_005311.1
4885379	histone H1.4 [Homo sapiens]	17.8082	6	9	6	219	21.9	11.03	37.33	6			NP_005312.1
4885385	histone H3.3 [Homo sapiens]	28.6765	2	2	2	136	15.3	11.27	9.07	2			NP_005315.1
5031571	actin-related protein 2 isoform b [Homo sapiens]	3.29949	2	3	2	394	44.7	6.74	10.01	2			NP_005713.1
5031635	cofilin-1 [Homo sapiens]	20.4819	3	3	3	166	18.5	8.09	14.27	3			NP_005498.1
5031857	L-lactate dehydrogenase A chain isoform 1 [Homo sapiens]	16.2651	5	5	4	332	36.7	8.27	19.38	5			NP_005557.1
5031877	lamin-B1 isoform 1 [Homo sapiens]	19.2833	9	10	9	586	66.4	5.16	34.21	9			NP_005564.1
5032179	transcription intermediary factor 1-beta [Homo sapiens]	2.03593	2	2	2	835	88.5	5.77	6.23	2			NP_005753.1
5174449	histone H1x [Homo sapiens]	17.8404	3	3	3	213	22.5	10.76	11.39	3			NP_006017.1
5174735	tubulin beta-4B chain [Homo sapiens]	35.0562	9	14	1	445	49.8	4.89	59.16	9			NP_006079.1
5453555	GTP-binding nuclear protein Ran isoform 1 [Homo sapiens]	10.6481	2	2	2	216	24.4	7.49	6.54	2			NP_006316.1
5729850	guanine nucleotide-binding protein G(k) subunit alpha [Homo sapiens]	7.06215	2	2	2	354	40.5	5.69	2.76	2			NP_006487.1
5902076	serine/arginine-rich splicing factor 1 isoform 1 [Homo sapiens]	12.0968	3	3	3	248	27.7	10.36	8.26	3			NP_008855.1
6678271	TAR DNA-binding protein 43 [Homo sapiens]	6.52174	2	2	2	414	44.7	6.19	6.63	2			NP_031401.1
6912616	histone H2A.V isoform 1 [Homo sapiens]	31.25	4	4	2	128	13.5	10.58	8.71	4			NP_036544.1
7669492	glyceraldehyde-3-phosphate dehydrogenase isoform 1 [Homo sapiens]	18.806	5	5	5	335	36	8.46	17.51	5			NP_002037.2
8923390	MICOS complex subunit MIC19 [Homo sapiens]	12.7753	2	2	2	227	26.1	8.28	5.28	2			NP_060282.1
9257257	WD repeat-containing protein 1 isoform 1 [Homo sapiens]	4.62046	2	2	2	606	66.2	6.65	7.39	2			NP_059830.1
9507215	tubulin alpha-8 chain isoform 1 [Homo sapiens]	19.1537	6	9	6	449	50.1	5.06	33.24	6			NP_061816.1
9845509	ras-related C3 botulinum toxin substrate 1 isoform Rac1b [Homo sapiens]	9.95261	2	2	1	211	23.5	8.63	6.57	2			NP_061485.1
9845511	ras-related C3 botulinum toxin substrate 1 isoform Rac1 [Homo sapiens]	10.9375	2	2	1	192	21.4	8.5	6.57	2			NP_008839.2
10800130	histone H2A type 1-D [Homo sapiens]	35.3846	5	6	3	130	14.1	10.9	19.91	5			NP_066409.1
10800140	histone H2B type 1-B [Homo sapiens]	28.5714	4	8	4	126	13.9	10.32	32.82	4			NP_066406.1
10800144	histone cluster 1, H2aj [Homo sapiens]	35.9375	5	6	3	128	13.9	10.89	19.91	5			NP_066544.1
10863927	peptidyl-prolyl cis-trans isomerase A isoform 1 [Homo sapiens]	61.8182	7	13	7	165	18	7.81	44.24	7			NP_066953.1
11415026	60S ribosomal protein L18a [Homo sapiens]	24.4318	5	6	5	176	20.7	10.71	12.78	5			NP_000971.1
11968182	40S ribosomal protein S18 [Homo sapiens]	24.3421	7	7	7	152	17.7	10.99	15.18	7			NP_072045.1
12229217	activity-dependent neuroprotector homeobox protein [Homo sapiens]	4.99093	3	3	3	1102	123.5	7.34	12.37	3			NP_056154.1
13904866	60S ribosomal protein L28 isoform 2 [Homo sapiens]	13.8686	2	2	2	137	15.7	12.02	8	2			NP_000982.2
14141152	heterogeneous nuclear ribonucleoprotein M isoform a [Homo sapiens]	13.8356	7	8	2	730	77.5	8.7	31.92	7			NP_005959.2
14141161	heterogeneous nuclear ribonucleoprotein U isoform b [Homo sapiens]	2.8536	2	2	2	806	88.9	5.78	4.47	2			NP_004492.2
14389309	tubulin alpha-1C chain isoform c [Homo sapiens]	24.4989	8	10	8	449	49.9	5.1	33.64	8			NP_116093.1
14591909	60S ribosomal protein L5 [Homo sapiens]	12.7946	3	4	3	297	34.3	9.72	13.79	3			NP_000960.2
14916501	40S ribosomal protein S24 isoform a [Homo sapiens]	17.6923	2	2	2	130	15.1	10.89	6.85	2			NP_148982.1
15431290	60S ribosomal protein L11 isoform 1 [Homo sapiens]	17.9775	3	4	3	178	20.2	9.6	13.31	3			NP_000966.2
15431293	60S ribosomal protein L15 isoform 1 [Homo sapiens]	21.5686	3	3	3	204	24.1	11.62	9.7	3			NP_002939.2
15431301	60S ribosomal protein L7 [Homo sapiens]	27.4194	7	8	7	248	29.2	10.65	23.82	7			NP_000962.2
15617199	histone H2A type 3 [Homo sapiens]	32.3077	4	4	2	130	14.1	11.05	12.59	4			NP_254280.1
16306566	histone H2B type 1-O [Homo sapiens]	28.5714	4	8	4	126	13.9	10.32	32.82	4			NP_003518.2
16507237	78 kDa glucose-regulated protein precursor [Homo sapiens]	15.2905	9	9	9	654	72.3	5.16	33.09	9			NP_005338.1
16579885	60S ribosomal protein L4 [Homo sapiens]	9.83607	5	6	5	427	47.7	11.06	23.68	5			NP_000959.2
16933546	60S acidic ribosomal protein P0 [Homo sapiens]	10.4101	2	2	2	317	34.3	5.97	7.46	2			NP_444505.1
17921989	tubulin alpha-4A chain isoform 1 [Homo sapiens]	25.6696	8	11	8	448	49.9	5.06	41.67	8			NP_005991.1
17921993	tubulin alpha-3C/D chain [Homo sapiens]	21.7778	7	9	7	450	49.9	5.1	30.43	7			NP_005992.1
17986258	myosin light polypeptide 6 isoform 1 [Homo sapiens]	26.4901	3	3	3	151	16.9	4.65	10.36	3			NP_066299.2
18105045	histone H2A type 1-H [Homo sapiens]	35.9375	5	6	3	128	13.9	10.89	19.91	5			NP_542163.1
18105048	histone H2B type 1-K [Homo sapiens]	28.5714	4	8	4	126	13.9	10.32	32.82	4			NP_542160.1
19557656	histone H2A type 1-B/E [Homo sapiens]	32.3077	4	4	2	130	14.1	11.05	12.59	4			NP_003504.2
20127408	trifunctional enzyme subunit alpha, mitochondrial precursor [Homo sapiens]	6.02883	2	2	2	763	82.9	9.04	10.5	2			NP_000173.2
20336752	histone H2B type 1-D [Homo sapiens]	28.5714	4	8	4	126	13.9	10.32	32.82	4			NP_619790.1
20336754	histone H2B type 1-J [Homo sapiens]	28.5714	4	8	4	126	13.9	10.32	32.82	4			NP_066402.2
20357599	histone H2A.V isoform 2 [Homo sapiens]	22.807	3	3	1	114	12.1	10.46	8.71	3			NP_619541.1
20544168	histone H1t [Homo sapiens]	7.72947	3	3	3	207	22	11.71	14.28	3			NP_005314.2
21166389	histone H2B type 1-C/E/F/G/I [Homo sapiens]	28.5714	4	8	4	126	13.9	10.32	32.82	4			NP_003517.2
21361322	tubulin beta-4A chain isoform 3 [Homo sapiens]	27.4775	7	12	1	444	49.6	4.88	48.62	7			NP_006078.2
21361657	protein disulfide-isomerase A3 precursor [Homo sapiens]	9.50495	4	4	4	505	56.7	6.35	17.28	4			NP_005304.3
21687102	mitochondrial import inner membrane translocase subunit TIM14 isoform 1 [Homo sapiens]	24.1379	2	2	2	116	12.5	10.1	8.76	2			NP_660304.1
24234686	heat shock cognate 71 kDa protein isoform 2 [Homo sapiens]	5.07099	2	3	2	493	53.5	5.86	11.55	2			NP_694881.1
24234688	stress-70 protein, mitochondrial precursor [Homo sapiens]	15.1694	7	7	7	679	73.6	6.16	28.43	7			NP_004125.3
24234750	interleukin enhancer-binding factor 3 isoform a [Homo sapiens]	2.57271	2	2	2	894	95.3	8.76	6.97	2			NP_036350.2
24234753	interleukin enhancer-binding factor 3 isoform b [Homo sapiens]	3.27635	2	2	2	702	76	7.75	6.97	2			NP_004507.2
24234756	interleukin enhancer-binding factor 3 isoform c [Homo sapiens]	3.33333	2	2	2	690	74.6	8.24	6.97	2			NP_703194.1
24308207	leucine-rich repeat-containing protein 47 [Homo sapiens]	2.74443	2	2	2	583	63.4	8.28	4.86	2			NP_065761.1
24586679	histone H2B type 1-A [Homo sapiens]	16.5354	3	4	3	127	14.2	10.32	11.87	3			NP_733759.1
24638446	histone H2A type 2-C [Homo sapiens]	35.6589	5	6	3	129	14	10.9	19.91	5			NP_003508.1
25092737	histone H2A type 1-A [Homo sapiens]	17.5573	3	3	1	131	14.2	10.86	8.86	3			NP_734466.1
27436946	lamin isoform A [Homo sapiens]	6.62651	3	3	3	664	74.1	7.02	11.45	3			NP_733821.1
27436948	lamin isoform A-delta10 [Homo sapiens]	4.73186	2	2	2	634	70.6	8.4	7.53	2			NP_733822.1
28173554	histone H2B type 3-B [Homo sapiens]	23.0159	3	7	3	126	13.9	10.32	30.67	3			NP_778225.1
28178832	isocitrate dehydrogenase [NADP], mitochondrial isoform 1 precursor [Homo sapiens]	13.9381	5	5	5	452	50.9	8.69	19.71	5			NP_002159.2
29553970	histone H2A.J [Homo sapiens]	35.6589	5	6	3	129	14	10.9	19.91	5			NP_808760.1
29788768	tubulin beta-2B chain [Homo sapiens]	25.8427	7	11	0	445	49.9	4.89	48.59	7			NP_821080.1
29788785	tubulin beta chain isoform b [Homo sapiens]	46.1712	13	19	1	444	49.6	4.89	70.56	13			NP_821133.1
30581135	structural maintenance of chromosomes protein 1A isoform 1 [Homo sapiens]	3.40633	3	3	3	1233	143.1	7.64	10.06	3			NP_006297.2
30795212	insulin-like growth factor 2 mRNA-binding protein 3 [Homo sapiens]	8.46287	3	3	3	579	63.7	8.87	10.04	3			NP_006538.2
33286418	pyruvate kinase PKM isoform a [Homo sapiens]	19.5857	8	9	8	531	57.9	7.84	38.21	8			NP_002645.3
33286422	pyruvate kinase PKM isoform b [Homo sapiens]	13.1827	5	6	5	531	58	7.71	25.98	5			NP_872271.1
33946278	cofilin-2 isoform 1 [Homo sapiens]	12.0482	2	2	2	166	18.7	7.88	9.55	2			NP_619579.1
33946324	guanine nucleotide-binding protein G(i) subunit alpha-1 isoform 1 [Homo sapiens]	7.06215	2	2	2	354	40.3	5.97	2.76	2			NP_002060.4
34147630	elongation factor Tu, mitochondrial precursor [Homo sapiens]	22.4176	7	7	7	455	49.8	7.61	29.09	7			NP_003312.3
38201710	probable ATP-dependent RNA helicase DDX17 isoform 1 [Homo sapiens]	9.32785	5	5	5	729	80.2	8.27	20.97	5			NP_006377.2
38570132	arf-GAP domain and FG repeat-containing protein 1 isoform 2 [Homo sapiens]	6.04982	2	2	2	562	58.2	8.63	6.04	2			NP_004495.2
41399285	60 kDa heat shock protein, mitochondrial [Homo sapiens]	8.37696	3	3	3	573	61	5.87	10.55	3			NP_955472.1
41406067	histone H2A.V isoform 3 [Homo sapiens]	30.3922	3	3	2	102	11	10.23	5.38	3			NP_958844.1
41406071	histone H2A.V isoform 5 [Homo sapiens]	34.4444	3	3	2	90	9.4	10.49	5.38	3			NP_958925.1
42558279	tubulin beta-8 chain [Homo sapiens]	15.7658	4	7	1	444	49.7	4.89	24.05	4			NP_817124.1
45439306	aspartate--tRNA ligase, cytoplasmic isoform 1 [Homo sapiens]	4.99002	2	2	2	501	57.1	6.55	5.69	2			NP_001340.2
46249393	rho-related GTP-binding protein RhoG precursor [Homo sapiens]	14.6597	2	2	1	191	21.3	8.12	7.5	2			NP_001656.2
46409270	tubulin alpha-3E chain [Homo sapiens]	19.3333	6	8	6	450	49.9	5.1	27.67	6			NP_997195.1
46593007	cytochrome b-c1 complex subunit 1, mitochondrial precursor [Homo sapiens]	4.16667	2	2	2	480	52.6	6.37	2.77	2			NP_003356.2
50345982	ATP synthase subunit alpha, mitochondrial isoform c [Homo sapiens]	27.2366	13	15	13	503	54.5	8.24	58.03	13			NP_001001935.1
50345984	ATP synthase subunit alpha, mitochondrial isoform a precursor [Homo sapiens]	24.774	13	15	13	553	59.7	9.13	58.03	13			NP_001001937.1
50345988	ATP synthase subunit gamma, mitochondrial isoform L (liver) precursor [Homo sapiens]	11.745	3	3	3	298	33	9.22	11.49	3			NP_001001973.1
50592996	tubulin beta-3 chain isoform 1 [Homo sapiens]	13.1111	4	7	0	450	50.4	4.93	25.48	4			NP_006077.2
51873064	lysosomal alpha-mannosidase isoform 1 precursor [Homo sapiens]	2.17606	2	2	2	1011	113.7	7.28	7.86	2			NP_000519.2
52632383	heterogeneous nuclear ribonucleoprotein L isoform a [Homo sapiens]	3.90492	2	2	2	589	64.1	8.22	6.88	2			NP_001524.2
52632385	heterogeneous nuclear ribonucleoprotein L isoform b [Homo sapiens]	5.04386	2	2	2	456	50.5	7.5	6.88	2			NP_001005335.1
53692187	actin-related protein 2 isoform a [Homo sapiens]	3.25815	2	3	2	399	45.3	7.2	10.01	2			NP_001005386.1
54860079	rho GTPase-activating protein 17 isoform 1 [Homo sapiens]	2.27015	2	2	2	881	95.4	7.62	6.04	2			NP_001006635.1
54860105	rho GTPase-activating protein 17 isoform 2 [Homo sapiens]	2.49066	2	2	2	803	87.6	7.59	6.04	2			NP_060524.4
55956788	nucleolin [Homo sapiens]	9.29577	4	4	4	710	76.6	4.7	17.9	4			NP_005372.2
55956899	keratin, type I cytoskeletal 9 [Homo sapiens]	4.6549	2	2	2	623	62	5.24	9.67	2			NP_000217.2
56676393	rho GDP-dissociation inhibitor 2 [Homo sapiens]	24.8756	3	3	3	201	23	5.21	9.03	3			NP_001166.3
57013276	tubulin alpha-1B chain [Homo sapiens]	31.0421	10	13	10	451	50.1	5.06	49.44	10			NP_006073.2
62241042	bifunctional glutamate/proline--tRNA ligase [Homo sapiens]	6.94444	6	6	6	1512	170.5	7.33	23.25	6			NP_004437.2
63055057	beta-actin-like protein 2 [Homo sapiens]	18.3511	6	14	0	376	42	5.59	45.8	6			NP_001017992.1
63252886	prolyl 4-hydroxylase subunit alpha-1 isoform 1 precursor [Homo sapiens]	16.1049	6	6	6	534	60.9	6.01	24.39	6			NP_000908.2
66912162	histone H2B type 2-F isoform a [Homo sapiens]	28.5714	4	8	4	126	13.9	10.32	32.82	4			NP_001019770.1
66933016	inosine-5'-monophosphate dehydrogenase 2 [Homo sapiens]	8.36576	3	3	3	514	55.8	6.9	10.09	3			NP_000875.2
68160937	E3 ubiquitin/ISG15 ligase TRIM25 [Homo sapiens]	5.55556	2	2	2	630	70.9	8.09	6.77	2			NP_005073.2
74136883	heterogeneous nuclear ribonucleoprotein U isoform a [Homo sapiens]	2.78788	2	2	2	825	90.5	6	4.47	2			NP_114032.2
75677353	ATPase family AAA domain-containing protein 3B [Homo sapiens]	3.39506	2	2	2	648	72.5	9.2	5.99	2			NP_114127.3
88703062	40S ribosomal protein S4, Y isoform 2 [Homo sapiens]	7.98479	2	2	2	263	29.3	10.08	6.04	2			NP_001034656.1
88999583	myosin light polypeptide 6 isoform 2 [Homo sapiens]	26.4901	3	3	3	151	17	4.55	10.36	3			NP_524147.2
106775678	histone H2A type 2-A [Homo sapiens]	35.3846	5	6	3	130	14.1	10.9	19.91	5			NP_001035807.1
109452591	succinyl-CoA ligase [ADP/GDP-forming] subunit alpha, mitochondrial precursor [Homo sapiens]	12.4277	3	4	3	346	36.2	8.79	13.36	3			NP_003840.2
116812577	putative RNA-binding protein Luc7-like 2 isoform 1 [Homo sapiens]	6.37755	2	2	2	392	46.5	10.01	7.64	2			NP_057103.2
117190174	heterogeneous nuclear ribonucleoproteins C1/C2 isoform b [Homo sapiens]	12.2867	3	4	3	293	32.3	5.08	13.75	3			NP_004491.2
118582269	serine/arginine-rich splicing factor 1 isoform 2 [Homo sapiens]	9.95025	2	2	2	201	22.4	7.94	5.36	2			NP_001071634.1
134133226	POTE ankyrin domain family member E [Homo sapiens]	5.76744	6	8	2	1075	121.3	6.2	27.98	6			NP_001077007.1
148536853	coatomer subunit alpha isoform 2 [Homo sapiens]	3.67647	3	3	3	1224	138.3	7.66	7.92	3			NP_004362.2
148536855	coatomer subunit alpha isoform 1 [Homo sapiens]	3.64964	3	3	3	1233	139.2	7.59	7.92	3			NP_001091868.1
148613856	probable ATP-dependent RNA helicase DDX17 isoform 3 [Homo sapiens]	9.30233	5	5	5	731	80.4	8.37	20.97	5			NP_001091974.1
149999611	signal recognition particle 14 kDa protein [Homo sapiens]	20.5882	3	3	3	136	14.6	10.04	7.8	3			NP_003125.3
151301228	pre-mRNA-processing factor 40 homolog A [Homo sapiens]	4.19355	3	3	3	930	105.9	7.99	9.42	3			NP_060362.3
153791352	POTE ankyrin domain family member F [Homo sapiens]	5.76744	6	8	2	1075	121.4	6.2	27.98	6			NP_001093241.1
153792590	heat shock protein HSP 90-alpha isoform 1 [Homo sapiens]	3.62998	3	3	1	854	98.1	5.16	10.63	3			NP_001017963.2
154146191	heat shock protein HSP 90-alpha isoform 2 [Homo sapiens]	4.23497	3	3	1	732	84.6	5.02	10.63	3			NP_005339.3
156071459	ADP/ATP translocase 2 [Homo sapiens]	7.04698	2	2	2	298	32.8	9.69	7.7	2			NP_001143.2
156523968	poly [ADP-ribose] polymerase 1 [Homo sapiens]	2.76134	2	2	2	1014	113	8.88	9.55	2			NP_001609.2
157412270	heterogeneous nuclear ribonucleoprotein M isoform b [Homo sapiens]	14.6165	7	8	2	691	73.6	8.82	31.92	7			NP_112480.2
167614485	3-ketoacyl-CoA thiolase, mitochondrial [Homo sapiens]	18.6398	3	3	3	397	41.9	8.09	10.63	3			NP_006102.2
194239727	elongation factor 1-delta isoform 2 [Homo sapiens]	9.96441	3	3	3	281	31.1	5.01	11.75	3			NP_001123527.1
194239729	elongation factor 1-delta isoform 4 [Homo sapiens]	10.8949	3	3	3	257	28.5	4.92	11.75	3			NP_001123528.1
206597505	arf-GAP domain and FG repeat-containing protein 1 isoform 1 [Homo sapiens]	5.82192	2	2	2	584	60.7	8.56	6.04	2			NP_001128659.1
206597507	arf-GAP domain and FG repeat-containing protein 1 isoform 3 [Homo sapiens]	6.07143	2	2	2	560	58.1	8.63	6.04	2			NP_001128660.1
206597509	arf-GAP domain and FG repeat-containing protein 1 isoform 4 [Homo sapiens]	6.51341	2	2	2	522	54.1	8.92	6.04	2			NP_001128661.1
207028494	L-lactate dehydrogenase A chain isoform 2 [Homo sapiens]	8.39416	3	3	2	274	30.2	7.15	11.21	3			NP_001128711.1
209915581	60S ribosomal protein L28 isoform 1 [Homo sapiens]	11.6564	2	2	2	163	18.4	10.78	8	2			NP_001129606.1
209915584	60S ribosomal protein L28 isoform 3 [Homo sapiens]	11.2426	2	2	2	169	19.1	10.83	8	2			NP_001129607.1
209915586	60S ribosomal protein L28 isoform 4 [Homo sapiens]	21.8391	2	2	2	87	10.1	10.67	8	2			NP_001129608.1
209915588	60S ribosomal protein L28 isoform 5 [Homo sapiens]	27.5362	2	2	2	69	7.9	10.7	8	2			NP_001129609.1
212549553	interleukin enhancer-binding factor 3 isoform d [Homo sapiens]	2.56125	2	2	2	898	95.7	8.81	6.97	2			NP_060090.2
212549555	interleukin enhancer-binding factor 3 isoform e [Homo sapiens]	3.25779	2	2	2	706	76.5	7.91	6.97	2			NP_001131145.1
214010222	40S ribosomal protein S24 isoform e [Homo sapiens]	17.4242	2	2	2	132	15.3	10.92	6.85	2			NP_001135755.1
214010224	40S ribosomal protein S24 isoform b [Homo sapiens]	17.5573	2	2	2	131	15.2	10.9	6.85	2			NP_001135754.1
214010226	40S ribosomal protein S24 isoform d [Homo sapiens]	7.95848	2	2	2	289	32.4	10.15	6.85	2			NP_001135757.1
217272849	prolyl 4-hydroxylase subunit alpha-1 isoform 2 precursor [Homo sapiens]	16.1049	6	6	6	534	61	6.01	24.39	6			NP_001136067.1
217272851	prolyl 4-hydroxylase subunit alpha-1 isoform 3 precursor [Homo sapiens]	16.6667	6	6	6	516	58.9	6.02	24.39	6			NP_001136068.1
222136639	C-1-tetrahydrofolate synthase, cytoplasmic [Homo sapiens]	3.74332	3	3	3	935	101.5	7.3	8.46	3			NP_005947.3
222352151	poly(rC)-binding protein 1 [Homo sapiens]	11.5169	3	3	3	356	37.5	7.09	9.61	3			NP_006187.2
226246671	40S ribosomal protein S20 isoform 1 [Homo sapiens]	19.0141	3	3	3	142	16	9.32	10.5	3			NP_001139699.1
238624110	histone H2B type 2-F isoform b [Homo sapiens]	26.8657	4	8	4	134	14.8	10.35	32.82	4			NP_001154806.1
239582755	unconventional myosin-Ig [Homo sapiens]	6.28684	5	5	5	1018	116.4	8.73	17.05	5			NP_149043.2
260099723	L-lactate dehydrogenase A chain isoform 3 [Homo sapiens]	14.9584	5	5	4	361	39.8	8.43	19.38	5			NP_001158886.1
260099725	L-lactate dehydrogenase A chain isoform 4 [Homo sapiens]	15.6934	3	3	2	274	30	8	12.25	3			NP_001158887.1
260099727	L-lactate dehydrogenase A chain isoform 5 [Homo sapiens]	17.8423	3	3	2	241	26.7	8.15	12.25	3			NP_001158888.1
261878575	guanine nucleotide-binding protein G(i) subunit alpha-2 isoform 2 [Homo sapiens]	18.239	4	4	4	318	36.4	5.59	8.99	4			NP_001159897.1
283436220	ATPase family AAA domain-containing protein 3A isoform 1 [Homo sapiens]	3.47003	2	2	2	634	71.3	8.98	5.99	2			NP_060658.3
283436222	ATPase family AAA domain-containing protein 3A isoform 2 [Homo sapiens]	3.75427	2	2	2	586	66.2	9.25	5.99	2			NP_001164006.1
291045220	lysosomal alpha-mannosidase isoform 2 precursor [Homo sapiens]	2.17822	2	2	2	1010	113.5	7.28	7.86	2			NP_001166969.1
291575128	L-lactate dehydrogenase B chain [Homo sapiens]	9.58084	3	3	2	334	36.6	6.05	9.74	3			NP_001167568.1
296179427	hydroxyacyl-coenzyme A dehydrogenase, mitochondrial isoform 1 precursor [Homo sapiens]	13.2931	2	2	2	331	36	8.53	7.09	2			NP_001171634.2
296179429	hydroxyacyl-coenzyme A dehydrogenase, mitochondrial isoform 2 precursor [Homo sapiens]	14.0127	2	2	2	314	34.3	8.85	7.09	2			NP_005318.3
298231213	mitochondrial import inner membrane translocase subunit TIM14 isoform 2 [Homo sapiens]	30.7692	2	2	2	91	10.1	10.05	8.76	2			NP_001177162.1
301171345	tubulin alpha-8 chain isoform 2 [Homo sapiens]	22.4543	6	9	6	383	42.9	5.08	33.24	6			NP_001180343.1
304555581	elongation factor 1-delta isoform 1 [Homo sapiens]	4.32767	3	3	3	647	71.4	6.42	11.75	3			NP_115754.3
308235963	tubulin beta-3 chain isoform 2 [Homo sapiens]	7.14286	2	5	0	378	42.4	4.96	16.01	2			NP_001184110.1
310689049	lamin-B1 isoform 2 [Homo sapiens]	15.1596	4	4	4	376	43	5.12	12.23	4			NP_001185486.1
313151210	peroxisomal multifunctional enzyme type 2 isoform 3 [Homo sapiens]	4.17827	2	2	2	718	77.8	8.76	7.28	2			NP_001186221.1
313482810	peroxisomal multifunctional enzyme type 2 isoform 1 [Homo sapiens]	3.94218	2	2	2	761	83	8.76	7.28	2			NP_001186220.1
315221152	60S ribosomal protein L11 isoform 2 [Homo sapiens]	18.0791	3	4	3	177	20.1	9.6	13.31	3			NP_001186731.1
315570273	actin, gamma-enteric smooth muscle isoform 2 precursor [Homo sapiens]	18.3183	6	9	0	333	37.1	5.54	26.7	6			NP_001186822.1
316659409	actin, cytoplasmic 2 [Homo sapiens]	42.4	15	26	6	375	41.8	5.48	92.52	15			NP_001186883.1
319996655	c-myc promoter-binding protein-1 isoform MBP-1 [Homo sapiens]	9.38416	2	2	2	341	36.9	6.28	8.69	2			NP_001188412.1
332164775	pyruvate kinase PKM isoform c [Homo sapiens]	11.5702	5	6	5	605	65.9	7.87	25.98	5			NP_001193725.1
332164777	pyruvate kinase PKM isoform d [Homo sapiens]	19.256	7	8	7	457	49.9	7.83	33.82	7			NP_001193726.1
332164779	pyruvate kinase PKM isoform e [Homo sapiens]	14.5349	6	6	6	516	56.2	8.44	24.77	6			NP_001193727.1
332164781	pyruvate kinase PKM isoform f [Homo sapiens]	13.0597	5	6	5	536	58.5	7.71	25.98	5			NP_001193728.1
347446676	C7orf55-LUC7L2 protein [Homo sapiens]	5.45852	2	2	2	458	54.2	10.13	7.64	2			NP_001231513.1
347446678	putative RNA-binding protein Luc7-like 2 isoform 3 [Homo sapiens]	6.42674	2	2	2	389	46.2	10.05	7.64	2			NP_001231514.1
371502127	macrophage-capping protein isoform 2 [Homo sapiens]	7.50751	2	2	2	333	36.8	7.2	7.02	2			NP_001243069.1
374081863	guanine nucleotide-binding protein G(i) subunit alpha-1 isoform 2 [Homo sapiens]	8.27815	2	2	2	302	34.8	5.74	2.76	2			NP_001243343.1
378404908	glyceraldehyde-3-phosphate dehydrogenase isoform 2 [Homo sapiens]	18.7713	4	4	4	293	31.5	7.61	14.76	4			NP_001243728.1
378548190	40S ribosomal protein S3 isoform 1 [Homo sapiens]	32.5103	8	8	8	243	26.7	9.66	24.88	8			NP_001243731.1
382546007	ATP synthase subunit alpha, mitochondrial isoform b precursor [Homo sapiens]	19.209	9	11	9	531	57.5	9.29	39.71	9			NP_001244263.1
383792150	lamin isoform D [Homo sapiens]	5.22648	2	2	2	574	63.9	6.74	6.88	2			NP_001244303.1
386869503	40S ribosomal protein S3 isoform 2 [Homo sapiens]	30.5019	8	8	8	259	28.5	9.73	24.88	8			NP_001247435.1
386869506	40S ribosomal protein S3 isoform 3 [Homo sapiens]	35.8974	4	4	4	117	12.6	9.28	11.12	4			NP_001247436.1
392494079	lipoamide acyltransferase component of branched-chain alpha-keto acid dehydrogenase complex, mitochondrial precursor [Homo sapiens]	4.77178	2	2	2	482	53.5	8.51	7.51	2			NP_001909.3
393715091	tubulin alpha-1A chain isoform 1 [Homo sapiens]	25.0554	8	10	8	451	50.1	5.06	35.12	8			NP_001257328.1
393715095	tubulin alpha-1A chain isoform 2 [Homo sapiens]	27.1635	8	10	8	416	46.3	5.08	35.12	8			NP_001257329.1
395132436	60S ribosomal protein L18 isoform 2 [Homo sapiens]	33.3333	5	7	5	159	18.1	11.84	24.04	5			NP_001257419.1
397174790	putative RNA-binding protein Luc7-like 2 isoform 4 [Homo sapiens]	6.39386	2	2	2	391	46.4	10.08	7.64	2			NP_001257572.1
431822401	heat shock protein HSP 90-beta isoform a [Homo sapiens]	11.4641	7	7	5	724	83.2	5.03	25.31	7			NP_001258898.1
431822406	heat shock protein HSP 90-beta isoform b [Homo sapiens]	10.503	6	6	5	676	78.2	5.05	21.04	6			NP_001258900.1
431822408	heat shock protein HSP 90-beta isoform c [Homo sapiens]	11.6246	7	7	5	714	82.3	5.06	25.31	7			NP_001258901.1
459352730	POTE ankyrin domain family member J [Homo sapiens]	3.37187	4	4	2	1038	117.3	5.97	12.68	4			NP_001264012.1
475808427	POTE ankyrin domain family member I [Homo sapiens]	4.27907	5	6	2	1075	121.2	6.21	18.57	5			NP_001264335.1
527317371	structural maintenance of chromosomes protein 1A isoform 2 [Homo sapiens]	3.46821	3	3	3	1211	140.8	7.4	10.06	3			NP_001268392.1
528281411	trifunctional enzyme subunit beta, mitochondrial isoform 2 precursor [Homo sapiens]	5.01089	2	2	2	459	49.6	9.42	5.72	2			NP_001268441.1
530360439	PREDICTED: ATPase family AAA domain-containing protein 3B isoform X1 [Homo sapiens]	3.75427	2	2	2	586	66.3	9.35	5.99	2			XP_005244863.1
530360444	PREDICTED: ATPase family AAA domain-containing protein 3B isoform X4 [Homo sapiens]	5.40541	2	2	2	407	45.8	9.94	5.99	2			XP_005244865.1
530361115	PREDICTED: heterochromatin protein 1-binding protein 3 isoform X1 [Homo sapiens]	5.78662	4	4	4	553	61.2	9.67	13.72	4			NP_001363718.
530361961	PREDICTED: lipoamide acyltransferase component of branched-chain alpha-keto acid dehydrogenase complex, mitochondrial isoform X1 [Homo sapiens]	7.6412	2	2	2	301	33	8.84	7.51	2			XP_005270602.1
530369312	PREDICTED: ras-related protein Ral-B isoform X3 [Homo sapiens]	10.9649	2	2	2	228	26	7.81	7.61	2			XP_005263781.1
530369322	PREDICTED: ras-related protein Ral-B isoform X1 [Homo sapiens]	12.1359	2	2	2	206	23.4	6.62	7.61	2			XP_005263786.1
530370273	PREDICTED: arf-GAP domain and FG repeat-containing protein 1 isoform X4 [Homo sapiens]	5.80205	2	2	2	586	60.9	8.56	6.04	2			XP_005246573.1
530370601	PREDICTED: pre-mRNA-processing factor 40 homolog A isoform X6 [Homo sapiens]	3.9959	3	3	3	976	110.7	7.96	9.42	3			XP_005246735.1
530370916	PREDICTED: tubulin alpha-4A chain isoform X1 [Homo sapiens]	26.5589	8	11	8	433	48.3	5.01	41.67	8			XP_005246889.1
530376503	PREDICTED: 60S ribosomal protein L9 isoform X1 [Homo sapiens]	22.9167	3	4	3	192	21.9	9.95	15.99	3			NP_001020092.
530377639	PREDICTED: hydroxyacyl-coenzyme A dehydrogenase, mitochondrial isoform X1 [Homo sapiens]	13.8365	2	2	2	318	35.2	7.21	7.09	2			NP_001317956
530381854	PREDICTED: histone H2B type 1-D isoform X1 [Homo sapiens]	24	4	8	4	150	16.3	10.32	32.82	4			XP_005249096.1
530384720	PREDICTED: heterogeneous nuclear ribonucleoproteins A2/B1 isoform X1 [Homo sapiens]	7.93201	2	2	2	353	37.4	8.95	6.58	2			XP_005249786.1
530388819	PREDICTED: elongation factor 1-delta isoform X1 [Homo sapiens]	4.06977	3	3	3	688	75.6	6.43	11.75	3			XP_005250877.1
530402140	PREDICTED: S-formylglutathione hydrolase isoform X1 [Homo sapiens]	9.57447	2	2	2	282	31.4	7.02	4.29	2			XP_005266335.1
530405975	PREDICTED: pyruvate kinase PKM isoform X3 [Homo sapiens]	17.5973	8	9	8	591	64.5	8.02	38.21	8			XP_005254500.1
530414822	PREDICTED: interleukin enhancer-binding factor 3 isoform X4 [Homo sapiens]	3.63349	2	2	2	633	66.3	9.39	6.97	2			XP_005259952.1
530414862	PREDICTED: lysosomal alpha-mannosidase isoform X1 [Homo sapiens]	2.17391	2	2	2	1012	113.8	7.28	7.86	2			XP_005259970.1
530416988	PREDICTED: 60S ribosomal protein L28 isoform X1 [Homo sapiens]	11.1765	2	2	2	170	19.1	11.46	8	2			XP_005259189.1
530427501	PREDICTED: heterogeneous nuclear ribonucleoprotein M isoform X1 [Homo sapiens]	10.9091	6	6	2	715	76	8.7	20.11	6			XP_005272535.1
530427503	PREDICTED: heterogeneous nuclear ribonucleoprotein M isoform X2 [Homo sapiens]	12.6404	6	7	1	712	75.6	8.57	28	6			XP_005272536.1
530427505	PREDICTED: heterogeneous nuclear ribonucleoprotein M isoform X3 [Homo sapiens]	11.5385	6	6	2	676	72.1	8.82	20.11	6			XP_005272537.1
530427507	PREDICTED: heterogeneous nuclear ribonucleoprotein M isoform X4 [Homo sapiens]	16.5574	7	8	2	610	64.4	8.76	31.92	7			XP_005272538.1
530427511	PREDICTED: heterogeneous nuclear ribonucleoprotein M isoform X5 [Homo sapiens]	17.6883	7	8	2	571	60.5	8.92	31.92	7			XP_005272540.1
530438702	PREDICTED: 40S ribosomal protein S26 [Homo sapiens]	23.4783	2	2	2	115	13	11	4.39	2			XP_005276741.1
543583773	guanine nucleotide-binding protein G(i) subunit alpha-2 isoform 3 [Homo sapiens]	19.1419	4	4	4	303	34.9	5.38	8.99	4			NP_001269546.1
543583775	guanine nucleotide-binding protein G(i) subunit alpha-2 isoform 4 [Homo sapiens]	21.1679	4	4	4	274	31.5	5.44	8.99	4			NP_001269547.1
543583777	guanine nucleotide-binding protein G(i) subunit alpha-2 isoform 5 [Homo sapiens]	17.1091	4	4	4	339	38.4	5.48	8.99	4			NP_001269548.1
543583779	guanine nucleotide-binding protein G(i) subunit alpha-2 isoform 6 [Homo sapiens]	17.1091	4	4	4	339	38.7	5.86	8.99	4			NP_001269549.1
544063464	lamin isoform E [Homo sapiens]	6.10998	2	2	2	491	55.7	7.02	6.88	2			NP_001269553.1
544063466	lamin isoform C [Homo sapiens]	7.69231	3	3	3	572	65.1	6.84	11.45	3			NP_001269554.1
544063468	lamin isoform A-delta50 [Homo sapiens]	7.16612	3	3	3	614	69.2	6.64	11.45	3			NP_001269555.1
567757609	chloride intracellular channel protein 1 [Homo sapiens]	11.6183	2	2	2	241	26.9	5.17	7.7	2			NP_001274523.1
574584803	tubulin beta-4A chain isoform 1 [Homo sapiens]	24.6465	7	12	1	495	54.4	5.02	48.62	7			NP_001276052.1
574584811	tubulin beta-4A chain isoform 2 [Homo sapiens]	24.9489	7	12	1	489	53.8	4.98	48.62	7			NP_001276056.1
574584818	tubulin beta-4A chain isoform 4 [Homo sapiens]	24.1935	5	10	0	372	41.6	4.94	39.25	5			NP_001276059.1
578798587	PREDICTED: alpha-enolase isoform X1 [Homo sapiens]	7.37327	2	2	2	434	47.3	6.99	8.69	2			NP_001340275
578800966	PREDICTED: histone H2B type 2-F isoform X1 [Homo sapiens]	24.4898	4	8	4	147	16.1	9.96	32.82	4			XP_006711398.1
578800968	PREDICTED: histone H2B type 2-F isoform X2 [Homo sapiens]	28.125	4	8	4	128	14.2	10.29	32.82	4			XP_006711399.1
578804211	PREDICTED: arf-GAP domain and FG repeat-containing protein 1 isoform X1 [Homo sapiens]	5.64784	2	2	2	602	62.6	8.56	6.04	2			XP_006712541.1
578804213	PREDICTED: arf-GAP domain and FG repeat-containing protein 1 isoform X2 [Homo sapiens]	5.66667	2	2	2	600	62.4	8.56	6.04	2			XP_006712542.1
578804215	PREDICTED: arf-GAP domain and FG repeat-containing protein 1 isoform X5 [Homo sapiens]	5.88235	2	2	2	578	59.9	8.65	6.04	2			XP_006712543.1
578804568	PREDICTED: pre-mRNA-processing factor 40 homolog A isoform X4 [Homo sapiens]	4.17559	3	3	3	934	106.3	7.99	9.42	3			NP_001352529
578806039	PREDICTED: inosine-5'-monophosphate dehydrogenase 2 isoform X1 [Homo sapiens]	7.07237	3	3	3	608	66.1	8.5	10.09	3			XP_006713191.1
578807655	PREDICTED: transformer-2 protein homolog beta isoform X1 [Homo sapiens]	13.2979	2	3	2	188	21.9	10.15	12.46	2			XP_006713787.1
578813467	PREDICTED: heterogeneous nuclear ribonucleoproteins A2/B1 isoform X2 [Homo sapiens]	8.94569	2	2	2	313	33.9	9.03	6.58	2			XP_006715777.1
578813594	PREDICTED: actin, cytoplasmic 1 isoform X1 [Homo sapiens]	33.9921	9	12	5	253	28.2	5.34	43.84	9			XP_006715827.1
578813852	PREDICTED: actin-related protein 2/3 complex subunit 1B isoform X1 [Homo sapiens]	6.1828	2	2	2	372	40.9	8.35	7.1	2			XP_006715889.1
578815687	PREDICTED: 60S ribosomal protein L7 isoform X1 [Homo sapiens]	26.9231	6	7	6	208	24.4	10.67	21.22	6			NP_001350666
578815872	PREDICTED: elongation factor 1-delta isoform X4 [Homo sapiens]	4.32767	3	3	3	647	71.4	6.42	11.75	3			XP_006716586.1
578822176	PREDICTED: acetyl-CoA acetyltransferase, mitochondrial isoform X1 [Homo sapiens]	8.01187	2	2	1	337	35.5	7.37	8.36	2			XP_006718897.1
578824099	PREDICTED: 60S ribosomal protein L6 isoform X1 [Homo sapiens]	14.5833	4	6	4	288	32.7	10.58	17.77	4			NP_001307066.
578827087	PREDICTED: pyruvate kinase PKM isoform X2 [Homo sapiens]	17.1901	8	9	8	605	65.8	7.99	38.21	8			XP_006720633.1
578831236	PREDICTED: serine/arginine-rich splicing factor 1 isoform X1 [Homo sapiens]	10.2041	2	2	2	196	21.8	8.69	5.36	2			XP_006722075.1
578833231	PREDICTED: interleukin enhancer-binding factor 3 isoform X2 [Homo sapiens]	2.69006	2	2	2	855	91.9	8.78	6.97	2			XP_006722805.1
578836330	PREDICTED: histone H2B type F-S-like [Homo sapiens]	28.5714	4	8	4	126	13.9	10.37	32.82	4			XP_006723981.1
578837316	PREDICTED: ras-related C3 botulinum toxin substrate 2 isoform X1 [Homo sapiens]	24.8447	4	4	3	161	18	6.32	9.35	4			XP_006724349.1
578839678	PREDICTED: elongation factor 1-delta isoform X2 [Homo sapiens]	4.07569	3	3	3	687	75.5	6.43	11.75	3			XP_006725128.1
578839680	PREDICTED: elongation factor 1-delta isoform X3 [Homo sapiens]	4.21687	3	3	3	664	73	6.34	11.75	3			XP_006725129.1
578846900	PREDICTED: histone H2B type F-S-like [Homo sapiens]	28.5714	4	8	4	126	13.9	10.32	32.82	4			XP_006726868.1
583966148	isocitrate dehydrogenase [NADP], mitochondrial isoform 2 [Homo sapiens]	15.75	5	5	5	400	45.2	7.75	19.71	5			NP_001276839.1
588282794	isocitrate dehydrogenase [NADP], mitochondrial isoform 3 [Homo sapiens]	19.5652	5	5	5	322	36.1	8.38	19.71	5			NP_001277043.1
635372936	peroxisomal multifunctional enzyme type 2 isoform 4 [Homo sapiens]	4.21348	2	2	2	712	77.5	8.72	7.28	2			NP_001278956.1
635372938	peroxisomal multifunctional enzyme type 2 isoform 5 [Homo sapiens]	5.03356	2	2	2	596	64.6	8.72	7.28	2			NP_001278957.1
645912968	tubulin beta chain isoform a [Homo sapiens]	40.5172	12	18	1	464	52	4.96	65.38	12			NP_001280141.1
645912972	tubulin beta chain isoform c [Homo sapiens]	50.8264	8	9	1	242	27.3	4.5	35.01	8			NP_001280142.1
645912975	tubulin beta chain isoform d [Homo sapiens]	43	10	16	1	400	44.8	4.98	61.85	10			NP_001280143.1
645912980	tubulin beta chain isoform e [Homo sapiens]	42.2043	9	15	1	372	41.7	4.91	57.56	9			NP_001280144.1
648216372	aspartate--tRNA ligase, cytoplasmic isoform 2 [Homo sapiens]	6.23441	2	2	2	401	45.7	5.71	5.69	2			NP_001280241.1
661902998	heterogeneous nuclear ribonucleoprotein M isoform c [Homo sapiens]	13.1092	6	6	2	595	63	8.78	20.11	6			NP_001284347.1
665821274	peptidyl-prolyl cis-trans isomerase A isoform 2 [Homo sapiens]	60.9524	4	8	4	105	11.4	7.9	38.31	4			NP_001287910.1
733605064	tubulin alpha-1C chain isoform b [Homo sapiens]	26.57	8	10	8	414	46	5.12	33.64	8			NP_001290045.1
733605926	tubulin alpha-1C chain isoform a [Homo sapiens]	21.1946	8	10	8	519	57.7	5.07	33.64	8			NP_001290043.1
746815975	tubulin beta-6 chain isoform 1 [Homo sapiens]	5.15695	2	5	0	446	49.8	4.88	15.08	2			NP_001290453.1
746815977	tubulin beta-6 chain isoform 5 [Homo sapiens]	6.03675	2	5	0	381	42.5	4.83	15.08	2			NP_001290457.1
746815999	tubulin beta-6 chain isoform 6 [Homo sapiens]	7.66667	2	5	0	300	34.1	4.84	15.08	2			NP_001290459.1
746816060	tubulin beta-6 chain isoform 3 [Homo sapiens]	5.62347	2	5	0	409	45.7	4.84	15.08	2			NP_001290455.1
746816073	tubulin beta-6 chain isoform 4 [Homo sapiens]	6.14973	2	5	0	374	41.9	4.91	15.08	2			NP_001290456.1
767904518	PREDICTED: heterochromatin protein 1-binding protein 3 isoform X2 [Homo sapiens]	6.21359	4	4	4	515	57.2	9.76	13.72	4			XP_011539834.1
767904524	PREDICTED: heterochromatin protein 1-binding protein 3 isoform X3 [Homo sapiens]	9.43953	4	4	4	339	37.9	9.35	13.72	4			XP_011539837.1
767906265	PREDICTED: ATPase family AAA domain-containing protein 3B isoform X2 [Homo sapiens]	4.55487	2	2	2	483	54	9.86	5.99	2			XP_011540542.1
767906275	PREDICTED: ATPase family AAA domain-containing protein 3B isoform X5 [Homo sapiens]	3.16092	2	2	2	696	77.6	8.98	5.99	2			XP_011540546.1
767909266	PREDICTED: lamin isoform X1 [Homo sapiens]	5.43478	2	2	2	552	61.3	6.74	6.88	2			XP_011507835.1
767909268	PREDICTED: lamin isoform X2 [Homo sapiens]	6.57895	2	2	2	456	50	9.7	6.88	2			XP_011507836.1
767914416	PREDICTED: trifunctional enzyme subunit beta, mitochondrial isoform X1 [Homo sapiens]	4.85232	2	2	2	474	51.3	9.41	5.72	2			XP_011531105.1
767914418	PREDICTED: trifunctional enzyme subunit beta, mitochondrial isoform X2 [Homo sapiens]	5.0885	2	2	2	452	48.8	9.17	5.72	2			XP_011531106.1
767915282	PREDICTED: macrophage-capping protein isoform X1 [Homo sapiens]	7.18391	2	2	2	348	38.5	6.19	7.02	2			XP_011531424.1
767917855	PREDICTED: arf-GAP domain and FG repeat-containing protein 1 isoform X3 [Homo sapiens]	5.79216	2	2	2	587	60.9	8.06	6.04	2			XP_011509373.1
767917859	PREDICTED: arf-GAP domain and FG repeat-containing protein 1 isoform X6 [Homo sapiens]	6.3197	2	2	2	538	55.9	8.92	6.04	2			XP_011509374.1
767918223	PREDICTED: POTE ankyrin domain family member E isoform X1 [Homo sapiens]	6.47858	6	8	2	957	107.7	6.68	27.98	6			XP_011509518.1
767918225	PREDICTED: POTE ankyrin domain family member E isoform X2 [Homo sapiens]	6.64523	6	8	2	933	105	6.39	27.98	6			XP_011509519.1
767918778	PREDICTED: pre-mRNA-processing factor 40 homolog A isoform X1 [Homo sapiens]	3.76448	3	3	3	1036	116.8	7.94	9.42	3			NP_001352526
767918780	PREDICTED: pre-mRNA-processing factor 40 homolog A isoform X2 [Homo sapiens]	3.81605	3	3	3	1022	115.3	7.81	9.42	3			NP_001352527
767918782	PREDICTED: pre-mRNA-processing factor 40 homolog A isoform X3 [Homo sapiens]	3.84236	3	3	3	1015	114.3	8.44	9.42	3			XP_011509749.1
767918785	PREDICTED: pre-mRNA-processing factor 40 homolog A isoform X5 [Homo sapiens]	4.25764	3	3	3	916	104.4	7.84	9.42	3			NP_001352530
767918788	PREDICTED: pre-mRNA-processing factor 40 homolog A isoform X7 [Homo sapiens]	4.44191	3	3	3	878	100.4	7.37	9.42	3			XP_011509751.1
767919101	PREDICTED: ras-related protein Ral-B isoform X2 [Homo sapiens]	10.917	2	2	2	229	26	7.81	7.61	2			XP_011509875.1
767919103	PREDICTED: ras-related protein Ral-B isoform X4 [Homo sapiens]	12.8205	2	2	2	195	22.6	7.87	7.61	2			XP_011509876.1
767919342	PREDICTED: POTE ankyrin domain family member I isoform X1 [Homo sapiens]	4.23963	5	6	2	1085	122.4	6.2	18.57	5			XP_011509972.1
767919377	PREDICTED: POTE ankyrin domain family member J isoform X1 [Homo sapiens]	3.33969	4	4	2	1048	118.5	5.96	12.68	4			XP_011509985.1
767919570	PREDICTED: POTE ankyrin domain family member F isoform X2 [Homo sapiens]	5.89914	6	8	2	1051	118.7	5.95	27.98	6			XP_011510064.1
767930270	PREDICTED: sister chromatid cohesion protein PDS5 homolog A isoform X1 [Homo sapiens]	3.59013	3	3	3	1337	150.7	7.91	14.67	3			XP_011511974.1
767930272	PREDICTED: sister chromatid cohesion protein PDS5 homolog A isoform X2 [Homo sapiens]	3.66972	3	3	3	1308	147.2	7.93	14.67	3			XP_011511975.1
767930274	PREDICTED: sister chromatid cohesion protein PDS5 homolog A isoform X3 [Homo sapiens]	3.71805	3	3	3	1291	145.8	7.87	14.67	3			XP_011511976.1
767939943	PREDICTED: tubulin beta-2B chain isoform X1 [Homo sapiens]	22.252	5	9	0	373	41.9	4.91	39.11	5			XP_011512873.1
767942082	PREDICTED: elongation factor 1-alpha 1 isoform X1 [Homo sapiens]	24.2424	7	9	7	462	50.1	9.01	27.45	7			XP_011533816.1
767944776	PREDICTED: insulin-like growth factor 2 mRNA-binding protein 3 isoform X1 [Homo sapiens]	8.39041	3	3	3	584	64.2	8.94	10.04	3			XP_011513391.1
767944778	PREDICTED: insulin-like growth factor 2 mRNA-binding protein 3 isoform X2 [Homo sapiens]	5.52017	2	2	2	471	51.7	9.42	7.13	2			XP_011513392.1
767944780	PREDICTED: insulin-like growth factor 2 mRNA-binding protein 3 isoform X3 [Homo sapiens]	6.16114	2	2	2	422	46.1	9.48	7.13	2			XP_011513393.1
767944782	PREDICTED: insulin-like growth factor 2 mRNA-binding protein 3 isoform X4 [Homo sapiens]	5.34979	2	2	2	486	53.2	8.92	7.13	2			XP_011513394.1
767948171	PREDICTED: MICOS complex subunit MIC19 isoform X1 [Homo sapiens]	12.5	2	2	2	232	26.7	7.75	5.28	2			NP_001304106
767948714	PREDICTED: zyxin isoform X1 [Homo sapiens]	6.8038	3	3	3	632	67.2	7.23	11.56	3			XP_011514869.1
767948716	PREDICTED: zyxin isoform X2 [Homo sapiens]	6.81458	3	3	3	631	67.1	7.23	11.56	3			XP_011514870.1
767948718	PREDICTED: zyxin isoform X3 [Homo sapiens]	7.15474	3	3	3	601	63.7	7.49	11.56	3			XP_011514871.1
767960019	PREDICTED: tubulin beta-8 chain isoform X1 [Homo sapiens]	14.7849	3	6	0	372	41.8	4.87	19.87	3			XP_011517761.1
767960021	PREDICTED: tubulin beta-8 chain isoform X2 [Homo sapiens]	7.90378	2	5	0	291	33	4.84	15.08	2			XP_011517762.1
767960085	PREDICTED: ATP synthase subunit gamma, mitochondrial isoform X1 [Homo sapiens]	13.9442	3	3	3	251	27.6	6.81	11.49	3			NP_001307815
767963460	PREDICTED: 40S ribosomal protein S24 isoform X1 [Homo sapiens]	12.5	2	2	2	184	20.9	10.55	6.85	2			XP_011538336.1
767963462	PREDICTED: 40S ribosomal protein S24 isoform X2 [Homo sapiens]	12.5683	2	2	2	183	20.8	10.62	6.85	2			XP_011538337.1
767963464	PREDICTED: 40S ribosomal protein S24 isoform X3 [Homo sapiens]	12.6374	2	2	2	182	20.7	10.62	6.85	2			XP_011538338.1
767963468	PREDICTED: 40S ribosomal protein S24 isoform X5 [Homo sapiens]	12.7072	2	2	2	181	20.6	10.61	6.85	2			XP_011538340.1
767970091	PREDICTED: heat shock cognate 71 kDa protein isoform X1 [Homo sapiens]	6.81115	4	5	4	646	70.9	5.52	17.74	4			XP_011541100.1
767975060	PREDICTED: 60S ribosomal protein L6 isoform X2 [Homo sapiens]	23.7288	4	6	4	177	20.4	10.52	17.77	4			NP_001307071
767977350	PREDICTED: S-formylglutathione hydrolase isoform X2 [Homo sapiens]	9.57447	2	2	2	282	31.2	7.65	4.29	2			XP_011533255.1
767977354	PREDICTED: S-formylglutathione hydrolase isoform X3 [Homo sapiens]	10.6719	2	2	2	253	28.2	6.79	4.29	2			XP_011533257.1
767979555	PREDICTED: cofilin-2 isoform X1 [Homo sapiens]	13.4228	2	2	2	149	16.9	8.62	9.55	2			XP_011534665.1
767979880	PREDICTED: cathepsin G isoform X1 [Homo sapiens]	18.2156	5	5	5	269	30.2	10.98	15.14	5			XP_011534801.1
767980428	PREDICTED: heterogeneous nuclear ribonucleoproteins C1/C2 isoform X1 [Homo sapiens]	11.7647	3	4	3	306	33.7	5.08	13.75	3			XP_011535013.1
767980445	PREDICTED: heat shock protein HSP 90-alpha isoform X1 [Homo sapiens]	3.63423	3	3	1	853	98	5.16	10.63	3			XP_011535020.1
767984412	PREDICTED: pyruvate kinase PKM isoform X4 [Homo sapiens]	18.3746	8	9	8	566	61.4	7.81	38.21	8			XP_011519972.1
767984414	PREDICTED: pyruvate kinase PKM isoform X5 [Homo sapiens]	12.3675	5	6	5	566	61.6	7.68	25.98	5			NP_001307071
767984416	PREDICTED: pyruvate kinase PKM isoform X6 [Homo sapiens]	18.8406	8	9	8	552	60.2	7.84	38.21	8			XP_011519974.1
767984418	PREDICTED: pyruvate kinase PKM isoform X7 [Homo sapiens]	12.6812	5	6	5	552	60.3	7.69	25.98	5			XP_011519975.1
767988216	PREDICTED: coronin-1A isoform X1 [Homo sapiens]	17.5705	6	7	6	461	51	6.68	29.52	6			XP_011544016.1
767988616	PREDICTED: rho GTPase-activating protein 17 isoform X1 [Homo sapiens]	2.19058	2	2	2	913	98.9	7.46	6.04	2			XP_011544175.1
767988621	PREDICTED: rho GTPase-activating protein 17 isoform X3 [Homo sapiens]	2.25989	2	2	2	885	95.6	7.66	6.04	2			XP_011544177.1
767988623	PREDICTED: rho GTPase-activating protein 17 isoform X4 [Homo sapiens]	2.29358	2	2	2	872	94.3	7.91	6.04	2			XP_011544178.1
767988628	PREDICTED: rho GTPase-activating protein 17 isoform X6 [Homo sapiens]	2.39521	2	2	2	835	91	7.44	6.04	2			XP_011544180.1
767988754	PREDICTED: elongation factor Tu, mitochondrial isoform X1 [Homo sapiens]	21.0773	6	6	6	427	46.8	7.39	24.74	6			XP_011544230.1
768000519	PREDICTED: ATP-dependent RNA helicase DDX39A isoform X1 [Homo sapiens]	9.83607	4	4	4	427	49.1	5.68	14.47	4			XP_011525922.1
768000524	PREDICTED: ATP-dependent RNA helicase DDX39A isoform X2 [Homo sapiens]	13.0631	2	2	2	222	26.1	5.97	6.6	2			XP_011525923.1
768002274	PREDICTED: interleukin enhancer-binding factor 3 isoform X1 [Homo sapiens]	2.56983	2	2	2	895	95.4	8.75	6.97	2			XP_011526286.1
768002280	PREDICTED: interleukin enhancer-binding factor 3 isoform X3 [Homo sapiens]	2.9601	2	2	2	777	83.3	8.62	6.97	2			XP_011526287.1
768002289	PREDICTED: interleukin enhancer-binding factor 3 isoform X5 [Homo sapiens]	4.08526	2	2	2	563	58.8	9.55	6.97	2			XP_011526289.1
768002454	PREDICTED: lysosomal alpha-mannosidase isoform X2 [Homo sapiens]	3.41615	2	2	2	644	72	8.31	7.86	2			XP_011526319.1
768008730	PREDICTED: heterogeneous nuclear ribonucleoprotein L isoform X2 [Homo sapiens]	4.44015	2	2	2	518	57.4	7.53	6.88	2			XP_011525188.1
768008733	PREDICTED: heterogeneous nuclear ribonucleoprotein L isoform X3 [Homo sapiens]	4.32331	2	2	2	532	59.3	7.84	6.88	2			XP_011525189.1
768008736	PREDICTED: heterogeneous nuclear ribonucleoprotein L isoform X4 [Homo sapiens]	4.35606	2	2	2	528	57.4	8.15	6.88	2			XP_011525190.1
768016784	PREDICTED: activity-dependent neuroprotector homeobox protein isoform X2 [Homo sapiens]	4.9505	3	3	3	1111	124.6	7.4	12.37	3			XP_011527050.1
768024950	PREDICTED: myosin-9 isoform X1 [Homo sapiens]	6.88776	9	9	9	1960	226.4	5.6	41.13	9			XP_011528499.1
768040779	PREDICTED: 40S ribosomal protein S4, Y isoform 2 isoform X1 [Homo sapiens]	8.53659	2	2	2	246	27.3	9.79	6.04	2			XP_011529725.1
768044336	PREDICTED: ribonuclease inhibitor isoform X1 [Homo sapiens]	6.72451	2	2	2	461	49.9	4.82	6.85	2			XP_011544908.1
768054000	PREDICTED: 40S ribosomal protein S9 isoform X1 [Homo sapiens]	13.9175	3	4	3	194	22.6	10.65	13.78	3			NP_001308631
